# Supplementary material for: The hidden demography of the 21st century global forest carbon sink
Source: Research Square preprint supplement (doi:10.21203/rs.3.rs-8515526/v1), 2026-01-29
Supplement: Supplementary file 1 [file 106393273e33b08c001f8b90.docx]

**Data S2.Aboveground Biomass (AGB) Growth Rates by Ecozone and Forest Age Class Based on MATRIX Simulations (IPCC Format).** Values represent the net annual change in aboveground biomass (Mg·ha⁻¹·yr⁻¹), along with its key components: mortality, ingrowth, and growth. The standard deviation (SD) reflects the variability in simulated growth within each 3-km pixel and across pixels within each continent–ecozone–age category. n indicates the number of 3-km pixels used for each category. For each 3-km grid cell, annual biomass increments were calculated as the difference between consecutive years over the simulation period. The annual increments were then averaged to obtain a per-cell mean net change (∆AGB), with parallel calculations for the demographic components of growth (G), recruitment (R), and mortality (M). Forest age class was assigned from the Global Primary Forest (GPF) raster(*1*): primary (GPF = 1), secondary ≤20 years (GPF = 2), and secondary >20 years (GPF = 3). Ecozone and continent codes were extracted from the GEZ layer(*2*) and matched to ecozone names using a lookup table.

| **Ecozone** | **Age** | **Net AGB Change and Components (Mg·ha-1yr-1)** | | | | | **n** |
| --- | --- | --- | --- | --- | --- | --- | --- |
| mean | SD | M | R | G |
| **Africa** | | | | | | | |
| Subtrop. dry | Primary | 2.93 | 0.43 | 1.63 | 0.25 | 4.30 | 13 |
| Subtrop. dry | Secondary<=20 | 3.73 | 0.84 | 1.22 | 0.38 | 4.56 | 626 |
| Subtrop. dry | Secondary>20 | 3.91 | 0.85 | 1.21 | 0.37 | 4.72 | 746 |
| Subtrop. mountain | Primary | 2.80 | 0.56 | 1.38 | 0.33 | 3.83 | 19 |
| Subtrop. mountain | Secondary<=20 | 2.76 | 0.61 | 1.72 | 0.32 | 4.14 | 1448 |
| Subtrop. mountain | Secondary>20 | 3.10 | 0.81 | 1.35 | 0.34 | 4.09 | 352 |
| Subtrop. steppe | Secondary<=20 | 3.43 | 1.48 | 0.07 | 0.19 | 3.29 | 27 |
| Subtrop. steppe | Secondary>20 | 3.25 | 2.05 | 0.04 | 0.19 | 3.07 | 22 |
| Tropical dry | Primary | 1.69 | 0.72 | 2.36 | 0.30 | 3.75 | 16839 |
| Tropical dry | Secondary<=20 | 2.11 | 0.99 | 2.26 | 0.29 | 4.07 | 30768 |
| Tropical dry | Secondary>20 | 1.95 | 0.87 | 2.33 | 0.30 | 3.96 | 24256 |
| Tropical moist | Primary | 1.84 | 0.60 | 2.47 | 0.21 | 4.09 | 88215 |
| Tropical moist | Secondary<=20 | 1.94 | 0.72 | 2.30 | 0.21 | 4.01 | 110894 |
| Tropical moist | Secondary>20 | 1.90 | 0.71 | 2.34 | 0.24 | 3.99 | 88159 |
| Tropical mountain | Primary | 0.02 | 0.68 | 4.55 | 0.33 | 4.21 | 11266 |
| Tropical mountain | Secondary<=20 | 0.05 | 0.65 | 4.39 | 0.33 | 4.09 | 16422 |
| Tropical mountain | Secondary>20 | 0.06 | 0.60 | 4.30 | 0.32 | 4.01 | 5830 |
| Tropical rainforest | Primary | 1.43 | 0.89 | 4.22 | 0.29 | 5.36 | 237392 |
| Tropical rainforest | Secondary<=20 | 1.55 | 1.07 | 4.78 | 0.27 | 6.07 | 98083 |
| Tropical rainforest | Secondary>20 | 1.28 | 0.96 | 4.53 | 0.25 | 5.57 | 22788 |
| Tropical shrubland | Primary | 0.95 | 0.81 | 3.26 | 0.26 | 3.95 | 401 |
| Tropical shrubland | Secondary<=20 | 0.77 | 0.81 | 3.52 | 0.26 | 4.01 | 918 |
| Tropical shrubland | Secondary>20 | 0.96 | 0.75 | 3.55 | 0.24 | 4.26 | 1051 |
| **Eurasia** | | | | | | | |
| Boreal conifer | Primary | 4.13 | 1.67 | 4.81 | 2.82 | 6.14 | 481135 |
| Boreal conifer | Secondary<=20 | 4.18 | 1.69 | 4.69 | 2.53 | 6.36 | 417619 |
| Boreal conifer | Secondary>20 | 4.46 | 1.57 | 4.93 | 2.59 | 6.84 | 363863 |
| Boreal mountain | Primary | 3.42 | 1.88 | 4.98 | 2.18 | 6.26 | 423028 |
| Boreal mountain | Secondary<=20 | 3.15 | 1.86 | 4.49 | 2.03 | 5.64 | 210170 |
| Boreal mountain | Secondary>20 | 4.17 | 1.89 | 5.10 | 2.33 | 6.99 | 112851 |
| Polar | Primary | 1.57 | 0.73 | 0.64 | 0.88 | 1.33 | 360 |
| Polar | Secondary<=20 | 1.51 | 0.62 | 0.62 | 0.86 | 1.26 | 19042 |
| Polar | Secondary>20 | 2.03 | 0.71 | 0.73 | 1.09 | 1.67 | 61 |
| Subtrop. dry | Primary | 4.09 | 1.88 | 1.29 | 0.34 | 5.01 | 68 |
| Subtrop. dry | Secondary<=20 | 2.69 | 1.80 | 0.92 | 0.19 | 3.39 | 12579 |
| Subtrop. dry | Secondary>20 | 2.43 | 1.48 | 1.01 | 0.20 | 3.23 | 12641 |
| Subtrop. humid | Primary | 6.17 | 2.69 | 2.23 | 1.11 | 7.26 | 4362 |
| Subtrop. humid | Secondary<=20 | 9.69 | 3.36 | 1.79 | 1.14 | 10.23 | 123282 |
| Subtrop. humid | Secondary>20 | 7.81 | 3.12 | 2.07 | 1.10 | 8.73 | 58324 |
| Subtrop. mountain | Primary | 4.61 | 1.62 | 2.33 | 0.78 | 6.14 | 10687 |
| Subtrop. mountain | Secondary<=20 | 5.03 | 2.51 | 1.88 | 0.68 | 6.20 | 47970 |
| Subtrop. mountain | Secondary>20 | 4.81 | 2.18 | 1.98 | 0.71 | 6.06 | 59817 |
| Temp. continental | Primary | 2.00 | 0.96 | 4.11 | 0.94 | 5.18 | 30162 |
| Temp. continental | Secondary<=20 | 2.71 | 1.68 | 4.38 | 0.74 | 6.37 | 211005 |
| Temp. continental | Secondary>20 | 2.52 | 1.79 | 4.26 | 0.82 | 5.97 | 185631 |
| Temp. mountain | Primary | 1.01 | 1.39 | 5.24 | 0.75 | 5.50 | 32266 |
| Temp. mountain | Secondary<=20 | 2.44 | 1.73 | 4.06 | 0.50 | 6.00 | 66149 |
| Temp. mountain | Secondary>20 | 1.98 | 1.67 | 4.32 | 0.56 | 5.74 | 80685 |
| Temp. oceanic | Primary | 4.79 | 2.53 | 3.97 | 0.53 | 8.24 | 45 |
| Temp. oceanic | Secondary<=20 | 4.81 | 3.14 | 4.78 | 0.53 | 9.06 | 59794 |
| Temp. oceanic | Secondary>20 | 4.08 | 2.88 | 3.81 | 0.44 | 7.46 | 20441 |
| Tropical dry | Primary | 8.09 | 3.61 | 3.63 | 0.65 | 10.91 | 5027 |
| Tropical dry | Secondary<=20 | 8.05 | 3.56 | 3.42 | 0.60 | 10.71 | 13425 |
| Tropical dry | Secondary>20 | 9.23 | 3.57 | 3.43 | 0.59 | 11.88 | 13389 |
| Tropical moist | Primary | 6.70 | 2.54 | 1.77 | 0.65 | 7.73 | 18532 |
| Tropical moist | Secondary<=20 | 6.67 | 2.63 | 1.65 | 0.62 | 7.61 | 42370 |
| Tropical moist | Secondary>20 | 7.27 | 2.63 | 1.74 | 0.63 | 8.26 | 30894 |
| Tropical rainforest | Primary | 4.48 | 2.73 | 3.00 | 0.61 | 6.84 | 160100 |
| Tropical rainforest | Secondary<=20 | 5.72 | 2.77 | 2.89 | 0.63 | 7.93 | 133612 |
| Tropical rainforest | Secondary>20 | 6.91 | 3.47 | 3.05 | 0.72 | 9.17 | 28340 |
| Tundra woodland | Primary | 1.33 | 0.46 | 0.69 | 0.76 | 1.27 | 33337 |
| Tundra woodland | Secondary<=20 | 1.34 | 0.48 | 0.69 | 0.78 | 1.28 | 30729 |
| Tundra woodland | Secondary>20 | 1.42 | 0.44 | 0.71 | 0.78 | 1.36 | 6144 |
| **North and Central America** | | | | | | | |
| Boreal conifer | Primary | 0.74 | 0.84 | 1.70 | 0.47 | 1.97 | 94890 |
| Boreal conifer | Secondary<=20 | 1.01 | 0.87 | 1.71 | 0.47 | 2.25 | 72891 |
| Boreal conifer | Secondary>20 | 1.28 | 0.91 | 1.72 | 0.44 | 2.56 | 63474 |
| Boreal mountain | Primary | 0.79 | 0.82 | 1.98 | 0.50 | 2.28 | 86671 |
| Boreal mountain | Secondary<=20 | 0.92 | 1.03 | 1.78 | 0.50 | 2.20 | 41107 |
| Boreal mountain | Secondary>20 | 1.12 | 1.01 | 1.81 | 0.46 | 2.47 | 6266 |
| Polar | Primary | 0.76 | 1.91 | 2.25 | 0.39 | 2.62 | 258 |
| Polar | Secondary<=20 | 1.02 | 2.10 | 2.73 | 0.51 | 3.24 | 6843 |
| Polar | Secondary>20 | 2.15 | 1.72 | 1.44 | 0.34 | 3.25 | 27 |
| Subtrop. desert | Primary | 1.19 | 0.80 | 1.13 | 0.51 | 1.81 | 13 |
| Subtrop. desert | Secondary<=20 | 0.60 | 0.71 | 1.37 | 0.57 | 1.40 | 641 |
| Subtrop. desert | Secondary>20 | 0.73 | 0.28 | 1.09 | 0.43 | 1.39 | 28 |
| Subtrop. dry | Secondary<=20 | 1.20 | n/a | 0.68 | 0.14 | 1.72 | 1 |
| Subtrop. dry | Secondary>20 | 1.22 | n/a | 0.52 | 0.16 | 1.58 | 1 |
| Subtrop. humid | Primary | 2.65 | 1.50 | 2.81 | 0.44 | 5.03 | 190 |
| Subtrop. humid | Secondary<=20 | 1.21 | 1.01 | 4.00 | 0.59 | 4.65 | 86612 |
| Subtrop. humid | Secondary>20 | 1.50 | 1.00 | 3.56 | 0.57 | 4.52 | 45347 |
| Subtrop. mountain | Primary | 1.66 | 1.05 | 1.64 | 0.44 | 2.85 | 9996 |
| Subtrop. mountain | Secondary<=20 | 1.64 | 1.22 | 1.75 | 0.39 | 2.99 | 14730 |
| Subtrop. mountain | Secondary>20 | 1.81 | 1.22 | 1.58 | 0.37 | 3.01 | 21586 |
| Subtrop. steppe | Primary | 1.58 | 0.73 | 1.43 | 0.66 | 2.34 | 474 |
| Subtrop. steppe | Secondary<=20 | 1.42 | 0.83 | 2.06 | 0.47 | 3.01 | 3040 |
| Subtrop. steppe | Secondary>20 | 1.41 | 0.86 | 1.95 | 0.44 | 2.92 | 3012 |
| Temp. continental | Primary | 0.92 | 0.99 | 2.39 | 0.42 | 2.90 | 12192 |
| Temp. continental | Secondary<=20 | 2.07 | 1.15 | 1.64 | 0.42 | 3.29 | 90558 |
| Temp. continental | Secondary>20 | 1.94 | 1.15 | 1.68 | 0.41 | 3.21 | 135539 |
| Temp. desert | Primary | 1.03 | 0.68 | 0.97 | 0.19 | 1.81 | 360 |
| Temp. desert | Secondary<=20 | 0.54 | 1.35 | 3.21 | 0.30 | 3.44 | 10091 |
| Temp. desert | Secondary>20 | 1.51 | 1.16 | 1.15 | 0.22 | 2.44 | 426 |
| Temp. mountain | Primary | 1.43 | 1.78 | 2.52 | 0.44 | 3.51 | 48482 |
| Temp. mountain | Secondary<=20 | 1.60 | 2.09 | 2.42 | 0.38 | 3.64 | 90127 |
| Temp. mountain | Secondary>20 | 1.79 | 1.97 | 2.32 | 0.37 | 3.74 | 142949 |
| Temp. oceanic | Primary | 2.86 | 0.82 | 3.48 | 0.27 | 6.08 | 193 |
| Temp. oceanic | Secondary<=20 | 5.28 | 1.10 | 2.13 | 0.19 | 7.22 | 3694 |
| Temp. oceanic | Secondary>20 | 5.29 | 1.24 | 2.26 | 0.19 | 7.35 | 2992 |
| Temp. steppe | Primary | 0.43 | 0.54 | 2.88 | 0.37 | 2.95 | 69 |
| Temp. steppe | Secondary<=20 | 2.38 | 1.00 | 1.74 | 0.39 | 3.71 | 3708 |
| Temp. steppe | Secondary>20 | 2.24 | 1.07 | 1.84 | 0.40 | 3.67 | 3040 |
| Tropical dry | Primary | 2.47 | 0.91 | 1.35 | 0.99 | 2.80 | 2436 |
| Tropical dry | Secondary<=20 | 2.12 | 0.74 | 1.15 | 0.81 | 2.44 | 5217 |
| Tropical dry | Secondary>20 | 2.17 | 0.78 | 1.20 | 0.86 | 2.48 | 8801 |
| Tropical moist | Primary | 2.43 | 0.92 | 1.27 | 1.18 | 2.50 | 5762 |
| Tropical moist | Secondary<=20 | 2.42 | 0.91 | 1.26 | 1.03 | 2.62 | 11533 |
| Tropical moist | Secondary>20 | 2.37 | 0.73 | 1.12 | 1.04 | 2.42 | 10617 |
| Tropical mountain | Primary | 2.53 | 0.84 | 1.83 | 0.70 | 3.63 | 3807 |
| Tropical mountain | Secondary<=20 | 2.45 | 0.79 | 1.41 | 0.60 | 3.24 | 6294 |
| Tropical mountain | Secondary>20 | 2.55 | 0.77 | 1.26 | 0.53 | 3.25 | 7773 |
| Tropical rainforest | Primary | 2.91 | 1.26 | 2.92 | 1.14 | 4.67 | 11156 |
| Tropical rainforest | Secondary<=20 | 2.83 | 1.23 | 2.50 | 1.02 | 4.28 | 18916 |
| Tropical rainforest | Secondary>20 | 2.46 | 0.96 | 2.25 | 0.95 | 3.75 | 6663 |
| Tundra woodland | Primary | 0.69 | 0.65 | 1.51 | 0.46 | 1.74 | 74409 |
| Tundra woodland | Secondary<=20 | 0.62 | 0.56 | 1.47 | 0.46 | 1.64 | 37340 |
| Tundra woodland | Secondary>20 | 1.12 | 0.67 | 1.57 | 0.44 | 2.27 | 7593 |
| **Oceania** | | | | | | | |
| Subtrop. humid | Primary | 4.78 | 4.88 | 4.08 | 0.13 | 8.70 | 2222 |
| Subtrop. humid | Secondary<=20 | 7.69 | 4.63 | 2.57 | 0.10 | 10.11 | 8737 |
| Subtrop. humid | Secondary>20 | 7.32 | 4.77 | 2.56 | 0.09 | 9.75 | 12436 |
| Subtrop. steppe | Primary | 3.88 | 1.78 | 3.96 | 0.08 | 7.75 | 1835 |
| Subtrop. steppe | Secondary<=20 | 7.24 | 3.78 | 2.41 | 0.05 | 9.57 | 2534 |
| Subtrop. steppe | Secondary>20 | 5.92 | 3.49 | 3.01 | 0.06 | 8.85 | 7687 |
| Temp. mountain | Primary | 1.84 | 3.53 | 5.41 | 0.20 | 7.05 | 3998 |
| Temp. mountain | Secondary<=20 | 7.01 | 5.27 | 2.77 | 0.10 | 9.63 | 6609 |
| Temp. mountain | Secondary>20 | 8.11 | 4.56 | 2.12 | 0.08 | 10.10 | 9179 |
| Temp. oceanic | Primary | 1.51 | 2.99 | 4.96 | 0.24 | 6.23 | 1967 |
| Temp. oceanic | Secondary<=20 | 7.45 | 4.76 | 2.68 | 0.14 | 9.95 | 5430 |
| Temp. oceanic | Secondary>20 | 6.67 | 4.80 | 2.88 | 0.15 | 9.37 | 6561 |
| Tropical mountain | Primary | 2.90 | 1.02 | 1.70 | 0.36 | 4.21 | 281 |
| Tropical mountain | Secondary<=20 | 2.57 | 1.36 | 1.64 | 0.31 | 3.88 | 324 |
| Tropical mountain | Secondary>20 | 2.90 | 1.30 | 1.70 | 0.35 | 4.24 | 280 |
| Tropical rainforest | Primary | 2.12 | 1.93 | 3.99 | 0.62 | 5.50 | 10927 |
| Tropical rainforest | Secondary<=20 | 2.13 | 2.12 | 4.05 | 0.64 | 5.55 | 4059 |
| Tropical rainforest | Secondary>20 | 3.34 | 1.72 | 3.01 | 0.56 | 5.79 | 1559 |
| **South America** | | | | | | | |
| Subtrop. humid | Primary | 3.07 | 2.22 | 5.22 | 0.94 | 7.34 | 3071 |
| Subtrop. humid | Secondary<=20 | 3.38 | 2.46 | 5.10 | 0.78 | 7.68 | 18145 |
| Subtrop. humid | Secondary>20 | 2.84 | 2.38 | 5.26 | 0.86 | 7.23 | 5757 |
| Temp. mountain | Primary | 13.74 | 6.36 | 8.51 | 1.23 | 20.95 | 2124 |
| Temp. mountain | Secondary<=20 | 13.34 | 6.58 | 8.80 | 1.21 | 20.86 | 1391 |
| Temp. mountain | Secondary>20 | 11.72 | 6.27 | 8.19 | 1.16 | 18.69 | 918 |
| Temp. oceanic | Primary | 10.37 | 5.19 | 8.06 | 1.27 | 17.13 | 8068 |
| Temp. oceanic | Secondary<=20 | 7.54 | 5.44 | 7.35 | 1.17 | 13.71 | 7538 |
| Temp. oceanic | Secondary>20 | 7.88 | 5.43 | 7.39 | 1.09 | 14.18 | 2620 |
| Temp. steppe | Primary | 12.60 | 3.94 | 6.02 | 0.49 | 18.03 | 500 |
| Temp. steppe | Secondary<=20 | 12.57 | 4.76 | 6.00 | 0.58 | 17.89 | 430 |
| Temp. steppe | Secondary>20 | 13.14 | 4.88 | 5.86 | 0.53 | 18.34 | 482 |
| Tropical dry | Primary | -2.36 | 0.94 | 7.57 | 1.10 | 4.05 | 10854 |
| Tropical dry | Secondary<=20 | -2.01 | 1.38 | 7.66 | 1.22 | 4.36 | 9511 |
| Tropical dry | Secondary>20 | -2.48 | 1.12 | 7.88 | 1.19 | 4.15 | 17853 |
| Tropical moist | Primary | 2.77 | 2.12 | 3.17 | 1.82 | 4.09 | 45876 |
| Tropical moist | Secondary<=20 | 1.96 | 1.67 | 3.22 | 1.40 | 3.77 | 44552 |
| Tropical moist | Secondary>20 | 1.65 | 1.37 | 3.22 | 1.23 | 3.63 | 25970 |
| Tropical mountain | Primary | 1.59 | 1.51 | 5.26 | 1.78 | 5.07 | 55460 |
| Tropical mountain | Secondary<=20 | 1.62 | 1.47 | 5.09 | 1.66 | 5.05 | 25740 |
| Tropical mountain | Secondary>20 | 1.33 | 1.31 | 5.23 | 1.59 | 4.97 | 10514 |
| Tropical rainforest | Primary | 1.97 | 2.11 | 5.02 | 1.99 | 4.99 | 596089 |
| Tropical rainforest | Secondary<=20 | 1.91 | 2.27 | 4.89 | 1.88 | 4.90 | 109945 |
| Tropical rainforest | Secondary>20 | 1.83 | 2.30 | 5.02 | 1.79 | 5.04 | 17639 |

**References**

1. N. Hunka *et al.*, "Classification of global forests for IPCC aboveground biomass Tier 1 estimates, 2020, ," (ORNL DAAC, Oak Ridge, Tennessee, USA, 2024).

2. G. FAO, Global ecological zones for FAO forest reporting: 2010 update. *FAO: Rome, Italy*, (2012).
