# Supplementary material for: The hidden demography of the 21st century global forest carbon sink
Source: Research Square preprint supplement (doi:10.21203/rs.3.rs-8515526/v1), 2026-01-29
Supplement: Supplementary file 3 [file 6bd0fb1e633ded220a972b0d.docx]

**data S1: Compilation of Allometric Equations for Species Across Different Continents.** Species: Lists the scientific names of the species for which allometric equations have been compiled. "General" indicates a general equation used commonly for all species present in the corresponding continent. Continent: Indicates the continent where the species is found. Equation: Specifies the species-specific allometric equations standardized for this analysis. Reference: Provides the literature reference cited for the specific species-specific equations.

| **Species** | **Continent** | | **Equation** | | **Reference** | |
| --- | --- | --- | --- | --- | --- | --- |
| Macaranga denticulata | Asia | |  | | Hung, D.N., Son, N.V., Hung, N.P. (2012) Tree allometric equation development for estimation of forest above-ground biomass in Viet Nam - Evergreen broadleaf forests in Quang Binh Province in (Eds) Inoguchi, A., Henry, M. Birigazzi, L. Sola, G. Tree allometric equation development for estimation of forest above-ground biomass in Viet Nam, UN-REDD Programme, Hanoi, Viet Nam | |
| Acacia mearnsii | North America | |  | | Dudley; N; Fownes; J; 1992; Preliminary biomass equations for eight species of fast-growing tropical trees; Journal of Tropical Forest Science; 5; 68-73; | |
| Clethra fimbriata | South America | |  | | Perez Lara, M; Diaz Timote, J. 2010. Estimacion del carbono contenido en la biomasa forestal aerea de dos bosques andinos en los departamentos de Santander y Cundinamarca. Ing. Forestal. CO., Universidad Distrital Francisco Jose de Caldas. 87 p. p. | |
| Clusia cruciate | South America | |  | | Perez Lara, M; Diaz Timote, J. 2010. Estimacion del carbono contenido en la biomasa forestal aerea de dos bosques andinos en los departamentos de Santander y Cundinamarca. Ing. Forestal. CO., Universidad Distrital Francisco Jose de Caldas. 87 p. p. | |
| Faramea flavicans | South America | |  | | Perez Lara, M; Diaz Timote, J. 2010. Estimacion del carbono contenido en la biomasa forestal aerea de dos bosques andinos en los departamentos de Santander y Cundinamarca. Ing. Forestal. CO., Universidad Distrital Francisco Jose de Caldas. 87 p. p. | |
| Blakea granatensis | South America | |  | | Perez Lara, M; Diaz Timote, J. 2010. Estimacion del carbono contenido en la biomasa forestal aerea de dos bosques andinos en los departamentos de Santander y Cundinamarca. Ing. Forestal. CO., Universidad Distrital Francisco Jose de Caldas. 87 p. p. | |
| Macleania rupestris | South America | |  | | Perez Lara, M; Diaz Timote, J. 2010. Estimacion del carbono contenido en la biomasa forestal aerea de dos bosques andinos en los departamentos de Santander y Cundinamarca. Ing. Forestal. CO., Universidad Distrital Francisco Jose de Caldas. 87 p. p. | |
| Populus tremuloides | North America | |  | | Pastor; J; Bockheim; J; 1981; Biomass and production of an aspen-mixed hardwood-spodosol ecosystem in northern Wisconsin; Canadian Journal of Forest Research; 11; 132-138; | |
| Bauhinia divaricata | North America | |  | | RodrÃ­guez R., J. JimÃ©nez, J. Meza, O. Aguirre y R. Razo. 2008. Carbono contenido en un bosque tropical subcaducifolio en la reserva de la biosfera el cielo, Tamaulipas, MÃ©xico. Revista Latinoamericana de Recursos Naturales 4 (2):215 -222. | |
| Acacia mangium | Asia | |  | | Krisnawati, H., W. C. Adinugroho and R. Imanuddin (2012). Monograph Allometric Models for Estimating Tree Biomass at Vrious Forest Ecosystem Types in Indonesia. Bogor, Indonesia, Research and Development Center for Conservation and Rehabilitation, Forestry Research and Development Agency, Ministry of Forestry. | |
| Litsea plutinosa | Asia | |  | | Huy, b. (2010). Co2 sequestration estimation for the litsea-cassava agroforestry model in mang yang district, gia lai province in the central highlands of vietnam, vietnam nework for agroforestry education - vnafe: 44 p. | |
| Carya ovata | North America | |  | | RodrÃ­guez R., J. JimÃ©nez, O. Aguirre, E. TreviÃ±o y E. TreviÃ±o. 2006. EstimaciÃ³n de carbono almacenado de niebla en Tamaulipas, MÃ©xico. Ciencia UANL 9(2): 179-188. | |
| Eucalyptus flocktoniae | Oceania | |  | | Jonson, J. H. and D. Freudenberger (2011). "Restore and sequester: Estimating biomass in native Australian woodland ecosystems for their carbon-funded restoration." Australian Journal of Botany 59(7): 639-652 | |
| Eucalyptus calycogona | Oceania | |  | | Paul, K. I., S. H. Roxburgh, et al. (2013). "Development and testing of allometric equations for estimating above-ground biomass of mixed-species environmental plantings." Forest Ecology and Management 310(0): 483-494. | |
| Eucalyptus argophloia | Oceania | |  | | Paul, K. I., S. H. Roxburgh, et al. (2013). "Development and testing of allometric equations for estimating above-ground biomass of mixed-species environmental plantings." Forest Ecology and Management 310(0): 483-494. | |
| Geunsia pentandra | Asia | |  | | Krisnawati, H., W. C. Adinugroho and R. Imanuddin (2012). Monograph Allometric Models for Estimating Tree Biomass at Vrious Forest Ecosystem Types in Indonesia. Bogor, Indonesia, Research and Development Center for Conservation and Rehabilitation, Forestry Research and Development Agency, Ministry of Forestry. | |
| Paraserianthes falcataria | Asia | |  | | Kumar, B.M., George, S.J., Jamaludheen, V. & Suresh, T.K. 1998. Comparison of biomass production , tree allometry and nutrient use efficiency of multipurpose trees grown in woodlot and silvopastoral experiments in Kerala , India. Forest Ecology and Management, 112: 145?163. | |
| General | Africa | |  | | Mugasha, W. A., Eid, T., BollandsÃ¥s, O. M., Malimbwi, R. E., Chamshama, S. A. O., Zahabu, E. and Katani, J. Z. 2013. Allometric models for prediction of above- and belowground biomass of trees in the miombo woodlands of Tanzania. Forest Ecology and Management 310: 87 â€“ 101. | |
| Betula papyrifera | North America | |  | | Crow; T; 1976; Biomass and production regressions for trees and woody shrubs common to the Enterprise Forest; In; Zavitkovski; J; ed; The Enterprise radiation forest; Radioecological studies; Rep; TID-26113-P2; Washington; DC; U;S; Energy Research and De | |
| Acacia mangium | Asia | |  | | Miyakuni, K., I. Heriansyah, N. M. Heriyanto and Y. Kiyono (2004). "Allometric biomass equations, biomas expansion factors and root-to-shoot ratios of planted Acacia mangium Willd. Forests in West Java, Indonesia." Japan Society of Forest Planning 10: 69-76. | |
| Eucalyptus grandis | North America | |  | | Dudley; N; Fownes; J; 1992; Preliminary biomass equations for eight species of fast-growing tropical trees; Journal of Tropical Forest Science; 5; 68-73; | |
| Thuja occidentalis | North America | |  | | Ker; M; van Raalte; G; 1981; Tree biomass equations for Abies balsamea and Picea glauca in northwestern New Brunswick; Canadian Journal of Forest Research; 11; 13-17; | |
| Populus tremuloides | North America | |  | | Johnston; R; Bartos; D; 1977; Summary of nutrient and biomass data from two aspen sites in western United States; Res; Pap; INT-227; Ogden; UT; U;S; Department of Agriculture; Forest Service; Intermountain Research Station; | |
| Olneya tesota | North America | |  | | Rolfe; G; Akhtar; M; Arnold; L; 1978; Nutrient distribution and flux in a mature oak-hickory forest; Forest Science; 41; 122-130; | |
| Laguncularia spp | North America | |  | | Smith, T. y K. Whelan. 2006. Development of allometric relations for three mangrove species in South Florida for use in the Greater Everglades Ecosystem restoration. Wetlands Ecology and Management 14:409-419. | |
| Avicennia germinans | North America | |  | | Smith, T. y K. Whelan. 2006. Development of allometric relations for three mangrove species in South Florida for use in the Greater Everglades Ecosystem restoration. Wetlands Ecology and Management 14:409-419. | |
| Laguncularia racemosa | North America | |  | | Smith, T. y K. Whelan. 2006. Development of allometric relations for three mangrove species in South Florida for use in the Greater Everglades Ecosystem restoration. Wetlands Ecology and Management 14:409-419. | |
| Eucalyptus camaldulensis | Asia | |  | | Mishra, H.C., Chandra, S.& Khanduja, C.P. 1994. Menagement of Forest Plantation Resources of Central Tarai Forest DivisionUsing Remote Sensing and GIS.75pp . | |
| Quercus spp | North America | |  | | NÃ¡var, J. 2009. Allometric equations for tree species and carbon stocks for forests of northwestern Mexico.Forest Ecology and Management 257:427-434 | |
| Hymenolobium nitidum | South America | |  | | Nogueira, E; Fearnside, P; Nelson, B; Barbosa, R; Keizer, E. 2008. Estimates of forest biomass in the Brazilian Amazon: New allometric equations and adjustments to biomass from wood-volume inventories. Forest Ecology and Management 256(11):1853-1867. | |
| Albizia falcataria | North America | |  | | Schubert; T; Strand; R; Cole; T; McDuffie; K; 1988; Equations for predicting biomass of six introduced subtropical tree species; Island of Hawaii; Res; Note PSW-401; Albany; CA; U;S; Department of Agriculture; Forest Service; Pacific Southwest Forest | |
| Eucalyptus cloeziana | Oceania | |  | | Paul, K. I., S. H. Roxburgh, et al. (2013). "Development and testing of allometric equations for estimating above-ground biomass of mixed-species environmental plantings." Forest Ecology and Management 310(0): 483-494. | |
| Tectona grandis | Asia | |  | | Krisnawati, H., W. C. Adinugroho and R. Imanuddin (2012). Monograph Allometric Models for Estimating Tree Biomass at Vrious Forest Ecosystem Types in Indonesia. Bogor, Indonesia, Research and Development Center for Conservation and Rehabilitation, Forestry Research and Development Agency, Ministry of Forestry. | |
| Pseudotsuga menziesii | North America | |  | | St; Clair; J; B; 1993; Family differences in equations for predicting biomass and leaf area in Douglas-fir (Pseudotsuga menziesii var; menziesii); Forest Science; 39; 743-755; | |
| Dichrostachys cinerea | Africa | |  | | de Klerk, J.N. 2002. Bush encroachment in Namibia. Report on Phase 1 of the Bush Encroachment Research. Monitoring and Management Project, Ministry of Environment and Tourism. | |
| Normanbya normanbyi | Oceania | |  | | Liddell, M. J., N. Nieullet, et al. (2007). "Assessing the above-ground biomass of a complex tropical rainforest using a canopy crane." Austral Ecology 32(1): 43-58 | |
| Juglans Mandshurica Maxim. | Asia | |  | | Wang, C. (2006). "Biomass allometric equations for 10 co-occurring tree species in Chinese temperate forests." Forest Ecology and Management 222(1-3): 9-16 | |
| Quercus velutina | North America | |  | | Williams, R. A.; McClenahen, J. R. 1984. Biomass prediction equations for seedlings, sprouts, and saplings of ten central hardwood species. Forest Science. 30: 523-527. | |
| Myrsine dependens | South America | |  | | Perez Lara, M; Diaz Timote, J. 2010. Estimacion del carbono contenido en la biomasa forestal aerea de dos bosques andinos en los departamentos de Santander y Cundinamarca. Ing. Forestal. CO., Universidad Distrital Francisco Jose de Caldas. 87 p. p. | |
| Eucalyptus camadulensis | Africa | |  | | Hailu, Z. 2002. Ecological impact evaluation of Eucalyptus plantations in comparison with agricultural and grazing land-use types in the Highlands of Ethiopia. Vienna University of Agricultural Sciences, Vienna. | |
| Tarchonanthus camphoratus | Africa | |  | | Kiruki H., Njung'e J., Kiyiapi J. 2009.Woody biomass estimation of Tarchonanthus camphoratus in three woodland stands at Naivasha, Kenya.African Journal of Ecology.48:5-12 | |
| Eucalyptus falcata | Oceania | |  | | Jonson, J. H. and D. Freudenberger (2011). "Restore and sequester: Estimating biomass in native Australian woodland ecosystems for their carbon-funded restoration." Australian Journal of Botany 59(7): 639-652 | |
| Eucalyptus utilis | Oceania | |  | | Paul, K. I., S. H. Roxburgh, et al. (2013). "Development and testing of allometric equations for estimating above-ground biomass of mixed-species environmental plantings." Forest Ecology and Management 310(0): 483-494. | |
| Populus tremuloides | North America | |  | | Ruark; G; A; Bockheim; J; G; 1988; Biomass; net primary production; and nutrient distribution for an age sequence of Populus tremuloides ecosystems; Canadian Journal of Forest Research; 18; 435-443; | |
| Quercus Mongolica Fisch. | Asia | |  | | Wang, C. (2006). "Biomass allometric equations for 10 co-occurring tree species in Chinese temperate forests." Forest Ecology and Management 222(1-3): 9-16 | |
| Pinus sylvestris | Europe | |  | | Oleksyn, J., Reich, P.B., Chalupka, W. and Tjoelker, M.G. 1999. Differential above- and below-ground biomass accumulation of European Pinus sylvestris populations in a 12-year-old provenance experiment. Scandinavian Journal of Forest Research (14) 1-17 | |
| Acacia saligna | Oceania | |  | | Jonson, J. H. and D. Freudenberger (2011). "Restore and sequester: Estimating biomass in native Australian woodland ecosystems for their carbon-funded restoration." Australian Journal of Botany 59(7): 639-652 | |
| Fagus sylvatica | Europe | |  | | Duvigneaud, P., Kestemont, P., Timperman, J. and Moniquet, J.-C. 1977. La hetraie ardennaise a Festuca Altissima a mirwart biomasse et productivite primaire. Productivite biologique en Belgique. Editions Duculot, Paris-Gembloux.107-154 | |
| Ailanthus excelsa | Asia | |  | | Toky,O.P.,Riddell-Black,D.,Harris,P.J.C.,Vasudevan,P. & Davies, P.A. 2011. Biomass production in short rotation effluent-irrigated plantations in North-West India. Journal of Scientific & Industrial Research, 70: 601?609. | |
| Combretum glutinosum | Africa | |  | | Kaire, 1999. La production ligneuse des jacheres et son utilisation par l'homme au Senegal, Universite de Provence Marseille, France. | |
| Faramea flavicans | South America | |  | | Perez Lara, M; Diaz Timote, J. 2010. Estimacion del carbono contenido en la biomasa forestal aerea de dos bosques andinos en los departamentos de Santander y Cundinamarca. Ing. Forestal. CO., Universidad Distrital Francisco Jose de Caldas. 87 p. p. | |
| Pinus durangensis | North America | |  | | Montes de Oca, E.; P. GarcÃ­a, J. NÃ¡jera y J. MÃ©ndez. 2009. Ajuste de ecuaciones de biomasa para Pinus durangensis (MartÃ­nez M.) en la regiÃ³n de El Salto, Durango. Revista Chapingo Serie Ciencias Forestales y del Ambiente 15(1): 65-71. | |
| Blepharocarya involucrigera | Oceania | |  | | Paul, K. I., S. H. Roxburgh, et al. (2013). "Development and testing of allometric equations for estimating above-ground biomass of mixed-species environmental plantings." Forest Ecology and Management 310(0): 483-494. | |
| General | Asia | |  | | Krisnawati, H., W. C. Adinugroho and R. Imanuddin (2012). Monograph Allometric Models for Estimating Tree Biomass at Vrious Forest Ecosystem Types in Indonesia. Bogor, Indonesia, Research and Development Center for Conservation and Rehabilitation, Forestry Research and Development Agency, Ministry of Forestry. | |
| Pinus Massoniana | Asia | |  | | Zhang, G., Li, X., et al. (2012). "Biomass characteristics of dominent tree species (group) at Lingnan forest farm in Anhui Province." Scientia Silvae Sincae 48(5): 136-140 | |
| Quercus ilex | Europe | |  | | Susmel, L., Viola, F. and Bassalo, G. 1976. Ecologie della Lecceta del Supramonte di Orgosolo. (Sardegna Centro-orientale). Analisi del Centro di Economia Montana delle Venezie (10) 1-216 | |
| Acacia murrayana | Oceania | |  | | Paul, K. I., S. H. Roxburgh, et al. (2013). "Development and testing of allometric equations for estimating above-ground biomass of mixed-species environmental plantings." Forest Ecology and Management 310(0): 483-494. | |
| Eucalyptus grandis | Asia | |  | | Krisnawati, H., W. C. Adinugroho and R. Imanuddin (2012). Monograph Allometric Models for Estimating Tree Biomass at Vrious Forest Ecosystem Types in Indonesia. Bogor, Indonesia, Research and Development Center for Conservation and Rehabilitation, Forestry Research and Development Agency, Ministry of Forestry. | |
| Fagus grandifolia | North America | |  | | Siccama; T; G; Hamburg; S; P; Arthur; M; A; Yanai; R; D; Bormann; F; H; Likens; G; E; 1994; Corrections to allometric equations and plant tissue chemistry for Hubbard Brook Experimental Forest; Ecology; 75; 246-248; | |
| Hardwickia binnata | Asia | |  | | Rai, A.P., Singh, U.P. & Jabeen, N. 2010. Statistical models for prediction of growth and yield of Dalbergia sisoo and Hardwickia binnata under silvipastoral system in India. Indian Journal of Forestry, 33(1): 13?20. | |
| Bambusa balcooa | Asia | |  | | Nath, A.J., Das, G. & Das, A.K. 2009. Above ground standing biomass and carbon storage in village bamboos in North East India. Biomass and Bioenergy, 33(9): 1188?1196. | |
| Leucaena leucocephala | Asia | |  | | Tandug, L. M. (1986). "Biomass prediction equations for giant ipil-ipil (Leucaena leucocephala (Lam.) de Wit)." Sylvatrop Philippine Forest Resources Journal 11(1 & 2): 1-22. | |
| Psidium guajava | North America | |  | | RodrÃ­guez R., J. JimÃ©nez, J. Meza, O. Aguirre y R. Razo. 2008. Carbono contenido en un bosque tropical subcaducifolio en la reserva de la biosfera el cielo, Tamaulipas, MÃ©xico. Revista Latinoamericana de Recursos Naturales 4 (2):215 -222. | |
| Liquidambar Formosana Hance | Asia | |  | | Zhang, K., Xu, X., et al. (2010). "Biomass, and carbon and nitrogen pools in a subtropical evergreen broad-leaved forest in eastern China." Journal of Forest Research 15(4): 274-282 | |
| Alstonia scholaris | Oceania | |  | | Liddell, M. J., N. Nieullet, et al. (2007). "Assessing the above-ground biomass of a complex tropical rainforest using a canopy crane." Austral Ecology 32(1): 43-58 | |
| Podocarpus matudae | North America | |  | | RodrÃ­guez R., J. JimÃ©nez, O. Aguirre, E. TreviÃ±o y E. TreviÃ±o. 2006. EstimaciÃ³n de carbono almacenado de niebla en Tamaulipas, MÃ©xico. Ciencia UANL 9(2): 179-188. | |
| Trichilia havanensis | North America | |  | | RodrÃ­guez R., J. JimÃ©nez, J. Meza, O. Aguirre y R. Razo. 2008. Carbono contenido en un bosque tropical subcaducifolio en la reserva de la biosfera el cielo, Tamaulipas, MÃ©xico. Revista Latinoamericana de Recursos Naturales 4 (2):215 -222. | |
| Pinus pseudostrobus | North America | |  | | RodrÃ­guez R., J. JimÃ©nez, O. Aguirre, E. TreviÃ±o y R. Razo. 2009. EstimaciÃ³n de carbono almacenado en el bosque de pino-encino en la Reserva de la Biosfera el Cielo, Tamaulipas, MÃ©xico. Ra Ximhai 5 (3): 317-327. | |
| Ternstroemia sylvatica | North America | |  | | RodrÃ­guez R., J. JimÃ©nez, O. Aguirre, E. TreviÃ±o y R. Razo. 2009. EstimaciÃ³n de carbono almacenado en el bosque de pino-encino en la Reserva de la Biosfera el Cielo, Tamaulipas, MÃ©xico. Ra Ximhai 5 (3): 317-327. | |
| General | Africa | |  | | Williams, M., Ryan, C.M., Rees, R.M., Sambane, E., Fernando, J. and Grace, J. 2008. Carbon sequestration and biodiversity of re-growing miombo woodlands in Mozambique. Forest Ecology and Management 254: 145-155. | |
| Pinus pseudostrobus | North America | |  | | DomÃ­nguez, G. 2005. EvaluaciÃ³n del contenido de carbono en bosques del sur de Nuevo LeÃ³n. Tesis de MaestrÃ­a. Universidad AutÃ³noma de Nuevo LeÃ³n. MÃ©xico. 63 p. | |
| Cupressus lusitanica var. benthamii | North America | |  | | Vigil, N. 2010. EstimaciÃ³n de biomasa y contenido de carbono en Cupressus lindleyi Klotzsch ex Endl. en el campo forestal experimental "Las Cruces", Texcoco, MÃ©xico. Tesis Profesional. Universidad AutÃ³noma Chapingo. MÃ©xico. 61 p. | |
| Alstonia scholaris | Oceania | |  | | Paul, K. I., S. H. Roxburgh, et al. (2013). "Development and testing of allometric equations for estimating above-ground biomass of mixed-species environmental plantings." Forest Ecology and Management 310(0): 483-494. | |
| Aniba cinnamomiflora | South America | |  | | Perez Lara, M; Diaz Timote, J. 2010. Estimacion del carbono contenido en la biomasa forestal aerea de dos bosques andinos en los departamentos de Santander y Cundinamarca. Ing. Forestal. CO., Universidad Distrital Francisco Jose de Caldas. 87 p. p. | |
| Cornus florida | North America | |  | | Boerner; R; Kost; J; 1986; Biomass equations for flowering dogwood; Cornus florida L; Castanea; 51; 153-155; | |
| All | South America | |  | | Schnitzer, S., DeWalt, S. and Chave, J. 2006. Censusing and Measuring Lianas: A Quantitative Comparison of the Common Methods. Biotropica,(38): 581-591. | |
| Eucalyptus captiosa | Oceania | |  | | Paul, K. I., S. H. Roxburgh, et al. (2013). "Development and testing of allometric equations for estimating above-ground biomass of mixed-species environmental plantings." Forest Ecology and Management 310(0): 483-494. | |
| Acacia mangium | Asia | |  | | Krisnawati, H., W. C. Adinugroho and R. Imanuddin (2012). Monograph Allometric Models for Estimating Tree Biomass at Vrious Forest Ecosystem Types in Indonesia. Bogor, Indonesia, Research and Development Center for Conservation and Rehabilitation, Forestry Research and Development Agency, Ministry of Forestry. | |
| Acacia decurrens | Oceania | |  | | Paul, K. I., S. H. Roxburgh, et al. (2013). "Development and testing of allometric equations for estimating above-ground biomass of mixed-species environmental plantings." Forest Ecology and Management 310(0): 483-494. | |
| Acer saccharum | North America | |  | | Bickelhaupt; D; Leaf; A; Richards; N; 1973; Effect of branching habit on above-ground dry weight estimates of Acer saccharum stands; In; Young; H; ed; IUFRO biomass studies; Nancy; France and Vancouver; BC; Orono; ME; University of Maine; College of L | |
| Populus deltoides | Asia | |  | | Das, D.K. & Chaturvedi, O.P. 2005. Structure and function of Populus deltoides agroforestry systems in eastern India1.Dry matter dynamics. Agroforestry Systems 65, 215?221. | |
| Populus deltoides G-3 | Asia | |  | | Das, D.K.& Chaturvedi, O.P. 2009. Energy dynamics and bioenergy production of Populus deltoides G-3 Marsh plantation in eastern India. Biomass and Bioenergy, 33(1): 144?148. | |
| Alnus acuminata subspp. glabrata | North America | |  | | Acosta, M., F. Carrillo y R. GÃ³mez. 2011. EstimaciÃ³n de biomasa y carbono en dos especies de bosque mesÃ³filo de montaÃ±a. Revista Mexicana de Ciencias AgrÃ­colas 2(4): 529-543. | |
| cinnamomiflora cinnamomiflora | South America | |  | | Perez Lara, M; Diaz Timote, J. 2010. Estimacion del carbono contenido en la biomasa forestal aerea de dos bosques andinos en los departamentos de Santander y Cundinamarca. Ing. Forestal. CO., Universidad Distrital Francisco Jose de Caldas. 87 p. p. | |
| tomentosa tomentosa | South America | |  | | Perez Lara, M; Diaz Timote, J. 2010. Estimacion del carbono contenido en la biomasa forestal aerea de dos bosques andinos en los departamentos de Santander y Cundinamarca. Ing. Forestal. CO., Universidad Distrital Francisco Jose de Caldas. 87 p. p. | |
| Picea mariana | North America | |  | | Ker, M. 1980, Tree biomass equations for seven species in southwestern New Brunswick, Inf. Rep. No. M-X-114, Fredericton, NS, Canadian Forestry Service, Maritime Forest Research Center | |
| General | Asia | |  | | Kenzo, T., Ichie, T., Hattori, D., Itioka, T., Handa, C., Ohkubo, T., Jawa Kendawang, J., Nakamur, M., Sakaguci, M., Takahashi N Okamoto M., Tanaka-Oda A., Sakura K. & Ninomiya I. 2009. Development of allometric relationships for accurate estimation of above- and below-ground biomass in tropical secondary forests in Sarawak, Malaysia. Journal of Forest Research, (25): 371â€“386 | |
| Acacia mangium | Asia | |  | | Krisnawati, H., W. C. Adinugroho and R. Imanuddin (2012). Monograph Allometric Models for Estimating Tree Biomass at Vrious Forest Ecosystem Types in Indonesia. Bogor, Indonesia, Research and Development Center for Conservation and Rehabilitation, Forestry Research and Development Agency, Ministry of Forestry. | |
| General | Asia | |  | | Banaticla, M. R. N., R. F. Sales and R. D. Lasco (2007). "Biomass equations for tropical tree plantation species using secondary data from the Philippines." Annals of Tropical Research 29(3): 73-90. | |
| General | Asia | |  | | Banaticla, M. R. N., R. F. Sales and R. D. Lasco (2007). "Biomass equations for tropical tree plantation species using secondary data from the Philippines." Annals of Tropical Research 29(3): 73-90. | |
| Guazuma ulmifolia | North America | |  | | RodrÃ­guez R., J. JimÃ©nez, J. Meza, O. Aguirre y R. Razo. 2008. Carbono contenido en un bosque tropical subcaducifolio en la reserva de la biosfera el cielo, Tamaulipas, MÃ©xico. Revista Latinoamericana de Recursos Naturales 4 (2):215 -222. | |
| Hevea brasiliensis | Asia | |  | | Krisnawati, H., W. C. Adinugroho and R. Imanuddin (2012). Monograph Allometric Models for Estimating Tree Biomass at Vrious Forest Ecosystem Types in Indonesia. Bogor, Indonesia, Research and Development Center for Conservation and Rehabilitation, Forestry Research and Development Agency, Ministry of Forestry. | |
| Colophospermum mopane | Africa | |  | | de Klerk, J.N. 2002. Bush encroachment in Namibia. Report on Phase 1 of the Bush Encroachment Research. Monitoring and Management Project, Ministry of Environment and Tourism. | |
| Eucalyptus sieberi | Oceania | |  | | Bi, H., J. Turner, et al. (2004). "Additive biomass equations for native eucalypt forest trees of temperate Australia." Trees 18(4): 467-479 | |
| Sonneratia alba | Africa | |  | | Kairo J. G., Bosire J., Langat J., Kirui B., Koedam N. 2009. Allometry and biomass distribution in replanted mangrove plantations at Gazi Bay, Kenya.Aquatic Conservation: Marine and Freshwater Ecosystems.19:63-69 | |
| Prunus pensylvanica | North America | |  | | MacLean; D; A; Wein; R; W; 1976; Biomass of jack pine and mixed hardwood stands in northeastern New Brunswick; Canadian Journal of Forest Research; 6; 441-447; | |
| Dalbergia sissoo | Asia | |  | | Rai, A.P., Singh, U.P. & Jabeen, N. 2010. Statistical models for prediction of growth and yield of Dalbergia sisoo and Hardwickia binnata under silvipastoral system in India. Indian Journal of Forestry, 33(1): 13?20. | |
| Pinus hartwegii | North America | |  | | JÃ­menez, C. 2010. Uso de ecuaciones alomÃ©tricas para estimar biomasa y carbono en la parte aÃ©rea de Pinus hartwegii Lindl., en el Parque Nacional Izta-Popo. Tesis Profesional. Universidad AutÃ³noma Chapingo, MÃ©xico. 55 p. | |
| Piscidia piscipula | North America | |  | | RodrÃ­guez R., J. JimÃ©nez, J. Meza, O. Aguirre y R. Razo. 2008. Carbono contenido en un bosque tropical subcaducifolio en la reserva de la biosfera el cielo, Tamaulipas, MÃ©xico. Revista Latinoamericana de Recursos Naturales 4 (2):215 -222. | |
| Bursera simaruba | North America | |  | | RodrÃ­guez R., J. JimÃ©nez, J. Meza, O. Aguirre y R. Razo. 2008. Carbono contenido en un bosque tropical subcaducifolio en la reserva de la biosfera el cielo, Tamaulipas, MÃ©xico. Revista Latinoamericana de Recursos Naturales 4 (2):215 -222. | |
| Brosimum alicastrum | North America | |  | | RodrÃ­guez R., J. JimÃ©nez, J. Meza, O. Aguirre y R. Razo. 2008. Carbono contenido en un bosque tropical subcaducifolio en la reserva de la biosfera el cielo, Tamaulipas, MÃ©xico. Revista Latinoamericana de Recursos Naturales 4 (2):215 -222. | |
| Acacia crassicarpa | Asia | |  | | Krisnawati, H., W. C. Adinugroho and R. Imanuddin (2012). Monograph Allometric Models for Estimating Tree Biomass at Vrious Forest Ecosystem Types in Indonesia. Bogor, Indonesia, Research and Development Center for Conservation and Rehabilitation, Forestry Research and Development Agency, Ministry of Forestry. | |
| Eucalyptus argyphea | Oceania | |  | | Paul, K. I., S. H. Roxburgh, et al. (2013). "Development and testing of allometric equations for estimating above-ground biomass of mixed-species environmental plantings." Forest Ecology and Management 310(0): 483-494. | |
| Pinus nigra | North America | |  | | Miller; E; Meeuwig; R; Budy; J; 1981; Biomass of singleleaf pinyon and Utah juniper; Res; Pap; INT- 273; Ogden; UT; U;S; Department of Agriculture; Forest Service; Intermountain Forest and Range Experiment Station; | |
| Erythrophloem chlorostachys | Oceania | |  | | O'Grady, A. P., X. Chen, et al. (2000). "Composition, leaf area index and standing biomass of eucalypt open forests near Darwin in the Northern Territory, Australia." Australian Journal of Botany 48(5): 629-638 | |
| Schima wallichii | Asia | |  | | Krisnawati, H., W. C. Adinugroho and R. Imanuddin (2012). Monograph Allometric Models for Estimating Tree Biomass at Vrious Forest Ecosystem Types in Indonesia. Bogor, Indonesia, Research and Development Center for Conservation and Rehabilitation, Forestry Research and Development Agency, Ministry of Forestry. | |
| Cupressus macrocarpa | Asia | |  | | Sharma, R.P. 2000. Allometric models for total-tree and component-tree biomass of Alogus nepalensis D.Don in Nepal. Indian Forester, 137(12): 1386?1390. | |
| General | Africa | |  | | Mugasha, W. A., Eid, T., BollandsÃ¥s, O. M., Malimbwi, R. E., Chamshama, S. A. O., Zahabu, E. and Katani, J. Z. 2013. Allometric models for prediction of above- and belowground biomass of trees in the miombo woodlands of Tanzania. Forest Ecology and Management 310: 87 â€“ 101. | |
| Pinus merkusii | Asia | |  | | Krisnawati, H., W. C. Adinugroho and R. Imanuddin (2012). Monograph Allometric Models for Estimating Tree Biomass at Vrious Forest Ecosystem Types in Indonesia. Bogor, Indonesia, Research and Development Center for Conservation and Rehabilitation, Forestry Research and Development Agency, Ministry of Forestry. | |
| Pongamia pinnata | Asia | |  | | Toky,O.P.,Riddell-Black,D.,Harris,P.J.C.,Vasudevan,P. & Davies, P.A. 2011. Biomass production in short rotation effluent-irrigated plantations in North-West India. Journal of Scientific & Industrial Research, 70: 601?609. | |
| Terminalia amazonia | North America | |  | | Montero, M. M. and Montagnini, F. 2004. Modelos Alometricos Para La Estimacion De Biomasa De Diez Especies Nativas En Plantaciones En La Region Atlantica De Costa Rica. Recursos Naturales y Ambiente,(45): 112-119. | |
| Bambusa vulgaris | Asia | |  | | Nath, A.J., Das, G. & Das, A.K. 2009. Above ground standing biomass and carbon storage in village bamboos in North East India. Biomass and Bioenergy, 33(9): 1188?1196. | |
| Clusia cruciata | South America | |  | | Perez Lara, M; Diaz Timote, J. 2010. Estimacion del carbono contenido en la biomasa forestal aerea de dos bosques andinos en los departamentos de Santander y Cundinamarca. Ing. Forestal. CO., Universidad Distrital Francisco Jose de Caldas. 87 p. p. | |
| Eucalyptus microcarpa | Oceania | |  | | Paul, K. I., S. H. Roxburgh, et al. (2013). "Development and testing of allometric equations for estimating above-ground biomass of mixed-species environmental plantings." Forest Ecology and Management 310(0): 483-494. | |
| Avicennia marina | Asia | |  | | Krisnawati, H., W. C. Adinugroho and R. Imanuddin (2012). Monograph Allometric Models for Estimating Tree Biomass at Vrious Forest Ecosystem Types in Indonesia. Bogor, Indonesia, Research and Development Center for Conservation and Rehabilitation, Forestry Research and Development Agency, Ministry of Forestry. | |
| Allocasuarina huegeliana | Oceania | |  | | Jonson, J. H. and D. Freudenberger (2011). "Restore and sequester: Estimating biomass in native Australian woodland ecosystems for their carbon-funded restoration." Australian Journal of Botany 59(7): 639-652 | |
| Pinus sylvestris | Europe | |  | | Briggs, E.F. and Cunia, T. 1982. Effect of cluster sampling in biomass tables construction: linear regression models. Canadian Journal of Forest Research (12) 255-263 | |
| Pseudotsuga menziesii | North America | |  | | Barclay; H; Pang; P; Pollard; D; 1986; Aboveground biomass distribution within trees and stands in thinned and fertilized Douglas-fir; Canadian Journal of Forest Research; 16; 438-442; | |
| Abies concolor | North America | |  | | Westman, W. 1987. Aboveground biomass, surface area, and production relations of red fir (Abies magnifica) and white fir (A. concolor). Canadian Journal of Forest Research. 17: 311-319. | |
| Eucalyptus crebra | Oceania | |  | | Paul, K. I., S. H. Roxburgh, et al. (2013). "Development and testing of allometric equations for estimating above-ground biomass of mixed-species environmental plantings." Forest Ecology and Management 310(0): 483-494. | |
| Diplostephium rosmarinifolium | South America | |  | | Perez Lara, M; Diaz Timote, J. 2010. Estimacion del carbono contenido en la biomasa forestal aerea de dos bosques andinos en los departamentos de Santander y Cundinamarca. Ing. Forestal. CO., Universidad Distrital Francisco Jose de Caldas. 87 p. p. | |
| Billia rosea | South America | |  | | Perez Lara, M; Diaz Timote, J. 2010. Estimacion del carbono contenido en la biomasa forestal aerea de dos bosques andinos en los departamentos de Santander y Cundinamarca. Ing. Forestal. CO., Universidad Distrital Francisco Jose de Caldas. 87 p. p. | |
| Ternstroemia sylvatica | North America | |  | | RodrÃ­guez R., J. JimÃ©nez, O. Aguirre, E. TreviÃ±o y E. TreviÃ±o. 2006. EstimaciÃ³n de carbono almacenado de niebla en Tamaulipas, MÃ©xico. Ciencia UANL 9(2): 179-188. | |
| Pinus patula | North America | |  | | DÃ­az, R., M. Acosta, F. Carrillo, E. BuendÃ­a, E. Flores y J. Etchevers. 2007. DeterminaciÃ³n de ecuaciones alomÃ©tricas para estimar biomasa y carbono en Pinus patula Schl. Cham. Madera y Bosques 13(1):25-34. | |
| Nyssa sylvatica | North America | |  | | Williams, R. A.; McClenahen, J. R. 1984. Biomass prediction equations for seedlings, sprouts, and saplings of ten central hardwood species. Forest Science. 30: 523-527. | |
| Pinus taeda | North America | |  | | Naidu; S; DeLucia; E; Thomas; R; 1998; Contrasting patterns of biomass allocation in dominant and suppressed loblolly pine; Canadian Journal of Forest Research; 28; 1116-1124; | |
| Bejaria resinosa | South America | |  | | Perez Lara, M; Diaz Timote, J. 2010. Estimacion del carbono contenido en la biomasa forestal aerea de dos bosques andinos en los departamentos de Santander y Cundinamarca. Ing. Forestal. CO., Universidad Distrital Francisco Jose de Caldas. 87 p. p. | |
| Terminalia amazonia | North America | |  | | Arreaga Gramajo, W. 2002. Almacenamiento del carbono en bosques con manejo forestal sostenible en la Reserva de Biosfera Maya, Peten, Guatemala. Tesis Mag. Sc. Turrialba, CR., CATIE. 86 p. p. | |
| Terminalia amazonia | North America | |  | | Arreaga Gramajo, W. 2002. Almacenamiento del carbono en bosques con manejo forestal sostenible en la Reserva de Biosfera Maya, Peten, Guatemala. Tesis Mag. Sc. Turrialba, CR., CATIE. 86 p. p. | |
| Eucalyptus rossii | Oceania | |  | | Bi, H., J. Turner, et al. (2004). "Additive biomass equations for native eucalypt forest trees of temperate Australia." Trees 18(4): 467-479 | |
| Bejaria resinosa | South America | |  | | Perez Lara, M; Diaz Timote, J. 2010. Estimacion del carbono contenido en la biomasa forestal aerea de dos bosques andinos en los departamentos de Santander y Cundinamarca. Ing. Forestal. CO., Universidad Distrital Francisco Jose de Caldas. 87 p. p. | |
| Eucalyptus radiata | Oceania | |  | | Bi, H., J. Turner, et al. (2004). "Additive biomass equations for native eucalypt forest trees of temperate Australia." Trees 18(4): 467-479 | |
| General | South America | |  | | Schnitzer, S., DeWalt, S. and Chave, J. 2006. Censusing and Measuring Lianas: A Quantitative Comparison of the Common Methods. Biotropica,(38): 581-591. | |
| Hyeronima alchorneoides | North America | |  | | Montero, M. M. and Montagnini, F. 2004. Modelos Alometricos Para La Estimacion De Biomasa De Diez Especies Nativas En Plantaciones En La Region Atlantica De Costa Rica. Recursos Naturales y Ambiente,(45): 112-119. | |
| Acacia reficiens | Africa | |  | | de Klerk, J.N. 2002. Bush encroachment in Namibia. Report on Phase 1 of the Bush Encroachment Research. Monitoring and Management Project, Ministry of Environment and Tourism. | |
| Acacia melanoxylon | Oceania | |  | | Paul, K. I., S. H. Roxburgh, et al. (2013). "Development and testing of allometric equations for estimating above-ground biomass of mixed-species environmental plantings." Forest Ecology and Management 310(0): 483-494. | |
| Casuarina equisetifolia | Asia | |  | | Kumar, B.M., George, S.J., Jamaludheen, V. & Suresh, T.K. 1998. Comparison of biomass production , tree allometry and nutrient use efficiency of multipurpose trees grown in woodlot and silvopastoral experiments in Kerala , India. Forest Ecology and Management, 112: 145?163. | |
| Myrsine dependens | South America | |  | | Perez Lara, M; Diaz Timote, J. 2010. Estimacion del carbono contenido en la biomasa forestal aerea de dos bosques andinos en los departamentos de Santander y Cundinamarca. Ing. Forestal. CO., Universidad Distrital Francisco Jose de Caldas. 87 p. p. | |
| Swietenia macrophylla | Asia | |  | | Krisnawati, H., W. C. Adinugroho and R. Imanuddin (2012). Monograph Allometric Models for Estimating Tree Biomass at Vrious Forest Ecosystem Types in Indonesia. Bogor, Indonesia, Research and Development Center for Conservation and Rehabilitation, Forestry Research and Development Agency, Ministry of Forestry. | |
| General | North America | |  | | RodrÃ­guez R., J. JimÃ©nez, O. Aguirre, E. TreviÃ±o y R. Razo. 2009. EstimaciÃ³n de carbono almacenado en el bosque de pino-encino en la Reserva de la Biosfera el Cielo, Tamaulipas, MÃ©xico. Ra Ximhai 5 (3): 317-327. | |
| Pinus montezumae | North America | |  | | RodrÃ­guez R., J. JimÃ©nez, O. Aguirre, E. TreviÃ±o y R. Razo. 2009. EstimaciÃ³n de carbono almacenado en el bosque de pino-encino en la Reserva de la Biosfera el Cielo, Tamaulipas, MÃ©xico. Ra Ximhai 5 (3): 317-327. | |
| General | Asia | |  | | Krisnawati, H., W. C. Adinugroho and R. Imanuddin (2012). Monograph Allometric Models for Estimating Tree Biomass at Vrious Forest Ecosystem Types in Indonesia. Bogor, Indonesia, Research and Development Center for Conservation and Rehabilitation, Forestry Research and Development Agency, Ministry of Forestry. | |
| Pinus montezumae | North America | |  | | Bonilla, E. 2009. Uso de ecuaciones alomÃ©tricas para estimar biomasa y carbono en Pinus montezumae Lamb. Tesis Profesional. Universidad AutÃ³noma Chapingp, MÃ©xico. 60p. | |
| Lithocarpus Glaber | Asia | |  | | Zhang, K., Xu, X., et al. (2010). "Biomass, and carbon and nitrogen pools in a subtropical evergreen broad-leaved forest in eastern China." Journal of Forest Research 15(4): 274-282 | |
| Eucalyptus polyanthemos | Oceania | |  | | Paul, K. I., S. H. Roxburgh, et al. (2013). "Development and testing of allometric equations for estimating above-ground biomass of mixed-species environmental plantings." Forest Ecology and Management 310(0): 483-494. | |
| Persea americana | Africa | |  | | Bradley, P.N. and Jan.B.H., K. 1988. Woody biomass survey of Kakamega district. The Beijer institute, Nairobi, Kenya. | |
| Pinus pinaster | Europe | |  | | Baldini, S., Berti, S., Cutini, A., Mannucci, M., Mercurio, R. and Spinelli, R. 1989. Prove sperimentali di primo diradamento in un soprassuolo di pino marittimo (Pinus pinaster Ait.) originato da incendio: aspetti silvicolturali, di utilizzazione e caratteristiche della biomassa. Ann. Ist. Sper. Selvicoltura (20) 385-436 | |
| General | South America | |  | | Perez Lara, M; Diaz Timote, J. 2010. Estimacion del carbono contenido en la biomasa forestal aerea de dos bosques andinos en los departamentos de Santander y Cundinamarca. Ing. Forestal. CO., Universidad Distrital Francisco Jose de Caldas. 87 p. p. | |
| Sapotaceae cinnamomiflora | South America | |  | | Perez Lara, M; Diaz Timote, J. 2010. Estimacion del carbono contenido en la biomasa forestal aerea de dos bosques andinos en los departamentos de Santander y Cundinamarca. Ing. Forestal. CO., Universidad Distrital Francisco Jose de Caldas. 87 p. p. | |
| General | Asia | |  | | Krisnawati, H., W. C. Adinugroho and R. Imanuddin (2012). Monograph Allometric Models for Estimating Tree Biomass at Vrious Forest Ecosystem Types in Indonesia. Bogor, Indonesia, Research and Development Center for Conservation and Rehabilitation, Forestry Research and Development Agency, Ministry of Forestry. | |
| Pinus arizonica var. ornelasii | North America | |  | | NÃ¡var, J. 2009. Allometric equations for tree species and carbon stocks for forests of northwestern Mexico.Forest Ecology and Management 257:427-434 | |
| Pseudotsuga menziesii | North America | |  | | Barclay; H; Pang; P; Pollard; D; 1986; Aboveground biomass distribution within trees and stands in thinned and fertilized Douglas-fir; Canadian Journal of Forest Research; 16; 438-442; | |
| Quercus spp | North America | |  | | Aguirre, O. y J. JimÃ©nez. 2011. EvaluaciÃ³n del contenido de carbono en bosques del sur de Nuevo LeÃ³n. Revista Mexicana de Ciencias Forestales 2 (6): 73-83. | |
| Quercus rysophylla | North America | |  | | RodrÃ­guez R., J. JimÃ©nez, O. Aguirre, E. TreviÃ±o y R. Razo. 2009. EstimaciÃ³n de carbono almacenado en el bosque de pino-encino en la Reserva de la Biosfera el Cielo, Tamaulipas, MÃ©xico. Ra Ximhai 5 (3): 317-327. | |
| Schinopsis glabra | South America | |  | | Sampaio, EVSB; Silva, GC. 2005. Biomass equations for Brazilian semiarid caatinga plants. Acta Botanica Brasilica 19(4):935-943. | |
| Picea abies | North America | |  | | Jokela; E; J; Van Gurp; K; P; Briggs; R; D; White; E; H; 1986; Biomass estimation equations for Norway spruce in New York; Canadian Journal of Forest Research; 16; 413-415; | |
| Eucalyptus globulus | Africa | |  | | Zewdie, M., Olsson, M. and Verwijst, T. 2009. Above-ground biomass production and allometric relations of Eucalyptus globulus Labill. coppice plantations along a chronosequence in the central highlands of Ethiopia. Biomass and Bioenergy 33: 421-428. | |
| Codonocarpus cotinifolious | Oceania | |  | | Paul, K. I., S. H. Roxburgh, et al. (2013). "Development and testing of allometric equations for estimating above-ground biomass of mixed-species environmental plantings." Forest Ecology and Management 310(0): 483-494. | |
| General | Asia | |  | | Krisnawati, H., W. C. Adinugroho and R. Imanuddin (2012). Monograph Allometric Models for Estimating Tree Biomass at Vrious Forest Ecosystem Types in Indonesia. Bogor, Indonesia, Research and Development Center for Conservation and Rehabilitation, Forestry Research and Development Agency, Ministry of Forestry. | |
| Terminalia macroptera | Africa | |  | | Manlay, R.J., Kaire, M., Masse, D., Chotte, J.-L., Ciornei, G. and Floret, C. 2002. Carbon, nitrogen and phosphorus allocation in agro-ecosystems of a West African savanna I. The plant component under semi-permanent cultivation. Agriculture, Ecosystems and Environment 88: 215-232. | |
| Pinus Massoniana | Asia | |  | | Zhang, Z., Wang, Y., et al. (2006). "Study on the biomass structure and distribution of natural secondary forest of Pinus assoniana." J Hebei Agri Univ 29(5):37â€“43 | |
| General | Africa | |  | | Mugasha, W. A., Eid, T., BollandsÃ¥s, O. M., Malimbwi, R. E., Chamshama, S. A. O., Zahabu, E. and Katani, J. Z. 2013. Allometric models for prediction of above- and belowground biomass of trees in the miombo woodlands of Tanzania. Forest Ecology and Management 310: 87 â€“ 101. | |
| Quercus rysophylla | North America | |  | | RodrÃ­guez R., J. JimÃ©nez, O. Aguirre, E. TreviÃ±o y E. TreviÃ±o. 2006. EstimaciÃ³n de carbono almacenado de niebla en Tamaulipas, MÃ©xico. Ciencia UANL 9(2): 179-188. | |
| Leucaena leucocephala | Asia | |  | | Tandug, L. M. (1986). "Biomass prediction equations for giant ipil-ipil (Leucaena leucocephala (Lam.) de Wit)." Sylvatrop Philippine Forest Resources Journal 11(1 & 2): 1-22. | |
| Pinus strobus | North America | |  | | MacLean; D; A; Wein; R; W; 1976; Biomass of jack pine and mixed hardwood stands in northeastern New Brunswick; Canadian Journal of Forest Research; 6; 441-447; | |
| Acacia mangium | Asia | |  | | Krisnawati, H., W. C. Adinugroho and R. Imanuddin (2012). Monograph Allometric Models for Estimating Tree Biomass at Vrious Forest Ecosystem Types in Indonesia. Bogor, Indonesia, Research and Development Center for Conservation and Rehabilitation, Forestry Research and Development Agency, Ministry of Forestry. | |
| General | Asia | |  | | Krisnawati, H., W. C. Adinugroho and R. Imanuddin (2012). Monograph Allometric Models for Estimating Tree Biomass at Vrious Forest Ecosystem Types in Indonesia. Bogor, Indonesia, Research and Development Center for Conservation and Rehabilitation, Forestry Research and Development Agency, Ministry of Forestry. | |
| Fraxinus Mandshurica Rupr. | Asia | |  | | Wang, C. (2006). "Biomass allometric equations for 10 co-occurring tree species in Chinese temperate forests." Forest Ecology and Management 222(1-3): 9-16 | |
| Berula Platyphylla Suk. | Asia | |  | | Wang, C. (2006). "Biomass allometric equations for 10 co-occurring tree species in Chinese temperate forests." Forest Ecology and Management 222(1-3): 9-16 | |
| Pinus banksiana | North America | |  | | Ker, M. 1980, Tree biomass equations for seven species in southwestern New Brunswick, Inf. Rep. No. M-X-114, Fredericton, NS, Canadian Forestry Service, Maritime Forest Research Center | |
| Tilia Amurensis Rupr. | Asia | |  | | Wang, C. (2006). "Biomass allometric equations for 10 co-occurring tree species in Chinese temperate forests." Forest Ecology and Management 222(1-3): 9-16 | |
| Pinus patula | North America | |  | | Pacheco, G. 2011. Ecuaciones alometricas para estimar biomasa aÃ©rea por compartimentos en reforestaciones de Pinus patula Schl. et Cham., en XiacuÃ­, Ixtlan, Oaxaca. Tesis Profesional. Universidad de la Sierra JuÃ¡rez. MÃ©xico. 58 p. | |
| General | Asia | |  | | Krisnawati, H., W. C. Adinugroho and R. Imanuddin (2012). Monograph Allometric Models for Estimating Tree Biomass at Vrious Forest Ecosystem Types in Indonesia. Bogor, Indonesia, Research and Development Center for Conservation and Rehabilitation, Forestry Research and Development Agency, Ministry of Forestry. | |
| Clethra pringlei | North America | |  | | RodrÃ­guez R., J. JimÃ©nez, O. Aguirre, E. TreviÃ±o y R. Razo. 2009. EstimaciÃ³n de carbono almacenado en el bosque de pino-encino en la Reserva de la Biosfera el Cielo, Tamaulipas, MÃ©xico. Ra Ximhai 5 (3): 317-327. | |
| Tectona grandis | Asia | |  | | Negi, M.S., Tandon, V.N. & Rawat, H.S. 1995. Biomass and nutrient distribution in young Teak (Tectona grandis linn.F) plantations in Tarai region of Uttar Pradesh. Indian Forester, 121(6): 455?464. | |
| Dipterocarpus kerrii | Asia | |  | | Krisnawati, H., W. C. Adinugroho and R. Imanuddin (2012). Monograph Allometric Models for Estimating Tree Biomass at Vrious Forest Ecosystem Types in Indonesia. Bogor, Indonesia, Research and Development Center for Conservation and Rehabilitation, Forestry Research and Development Agency, Ministry of Forestry. | |
| Eucalyptus camadulensis | Africa | |  | | Hailu, Z. 2002. Ecological impact evaluation of Eucalyptus plantations in comparison with agricultural and grazing land-use types in the Highlands of Ethiopia. Vienna University of Agricultural Sciences, Vienna. | |
| General | South America | |  | | Perez Lara, M; Diaz Timote, J. 2010. Estimacion del carbono contenido en la biomasa forestal aerea de dos bosques andinos en los departamentos de Santander y Cundinamarca. Ing. Forestal. CO., Universidad Distrital Francisco Jose de Caldas. 87 p. p. | |
| Gironniera subaequalis | Asia | |  | | Lv, X., Tang, J., et al. (2007). "Biomass and its allocation in tropical seasonal rainforest in Xishuangbanna, Southwest China." Journal of Plant Ecology 31(1): 11-22 | |
| General | South America | |  | | Perez Lara, M; Diaz Timote, J. 2010. Estimacion del carbono contenido en la biomasa forestal aerea de dos bosques andinos en los departamentos de Santander y Cundinamarca. Ing. Forestal. CO., Universidad Distrital Francisco Jose de Caldas. 87 p. p. | |
| Phellodendron Amurense Rupr. | Asia | |  | | Wang, C. (2006). "Biomass allometric equations for 10 co-occurring tree species in Chinese temperate forests." Forest Ecology and Management 222(1-3): 9-16 | |
| Larix laricina | North America | |  | | Singh; K; P; Misra; R; 1979; Structure and function of natural; modified; and silvicultural ecosystems in Uttar Pradesh; Varanasi; Final Tech Report (1975-1978) Man and the Biosphere (MAB) Research Project; | |
| Myristica insipida | Oceania | |  | | Liddell, M. J., N. Nieullet, et al. (2007). "Assessing the above-ground biomass of a complex tropical rainforest using a canopy crane." Austral Ecology 32(1): 43-58 | |
| Vochysia guatemalensis | North America | |  | | Montero, M. M. and Montagnini, F. 2004. Modelos Alometricos Para La Estimacion De Biomasa De Diez Especies Nativas En Plantaciones En La Region Atlantica De Costa Rica. Recursos Naturales y Ambiente,(45): 112-119. | |
| Vatairea paraensis | South America | |  | | Overman, JPM; Witte, HJL; Saldarriaga, JG. 1994. Evaluation of regression models for above-ground biomass determination in Amazon Rainforest. Journal of Tropical Ecology 10(2). | |
| Acer saccharum | North America | |  | | Morrison; I; 1990; Organic matter and mineral distribution in an old-growth Acer saccharum forest near the northern limit of its range; Canadian Journal of Forest Research; 20; 1332-1342; | |
| Acer rubrum | North America | |  | | Williams, R. A.; McClenahen, J. R. 1984. Biomass prediction equations for seedlings, sprouts, and saplings of ten central hardwood species. Forest Science. 30: 523-527. | |
| Eucalyptus falcata | Oceania | |  | | Jonson, J. H. and D. Freudenberger (2011). "Restore and sequester: Estimating biomass in native Australian woodland ecosystems for their carbon-funded restoration." Australian Journal of Botany 59(7): 639-652 | |
| Eucalyptus spporadica | Oceania | |  | | Paul, K. I., S. H. Roxburgh, et al. (2013). "Development and testing of allometric equations for estimating above-ground biomass of mixed-species environmental plantings." Forest Ecology and Management 310(0): 483-494. | |
| Picea glauca | North America | |  | | Singh; K; P; Misra; R; 1979; Structure and function of natural; modified; and silvicultural ecosystems in Uttar Pradesh; Varanasi; Final Tech Report (1975-1978) Man and the Biosphere (MAB) Research Project; | |
| Pterocarpus marsupium | Asia | |  | | Kumar, B.M., George, S.J., Jamaludheen, V. & Suresh, T.K. 1998. Comparison of biomass production , tree allometry and nutrient use efficiency of multipurpose trees grown in woodlot and silvopastoral experiments in Kerala , India. Forest Ecology and Management, 112: 145?163. | |
| Pinus merkusii | Asia | |  | | Krisnawati, H., W. C. Adinugroho and R. Imanuddin (2012). Monograph Allometric Models for Estimating Tree Biomass at Vrious Forest Ecosystem Types in Indonesia. Bogor, Indonesia, Research and Development Center for Conservation and Rehabilitation, Forestry Research and Development Agency, Ministry of Forestry. | |
| Bejaria resinosa | South America | |  | | Perez Lara, M; Diaz Timote, J. 2010. Estimacion del carbono contenido en la biomasa forestal aerea de dos bosques andinos en los departamentos de Santander y Cundinamarca. Ing. Forestal. CO., Universidad Distrital Francisco Jose de Caldas. 87 p. p. | |
| Araucaria cunninghamii | Oceania | |  | | Paul, K. I., S. H. Roxburgh, et al. (2013). "Development and testing of allometric equations for estimating above-ground biomass of mixed-species environmental plantings." Forest Ecology and Management 310(0): 483-494. | |
| Hopea spp | Asia | |  | | Basuki, T. M., P. E. van Laake, A. K. Skidmore and Y. A. Hussin (2009). "Allometric equations for estimating the above-ground biomass in tropical lowland Dipterocarp forests." Forest Ecology and Management 257(8): 1684-1694 | |
| Eucalyptus camaldulensis | Asia | |  | | Mishra, H.C., Chandra, S.& Khanduja, C.P. 1994. Menagement of Forest Plantation Resources of Central Tarai Forest DivisionUsing Remote Sensing and GIS.75pp . | |
| Tilia americana var. mexicana | North America | |  | | RodrÃ­guez R., J. JimÃ©nez, J. Meza, O. Aguirre y R. Razo. 2008. Carbono contenido en un bosque tropical subcaducifolio en la reserva de la biosfera el cielo, Tamaulipas, MÃ©xico. Revista Latinoamericana de Recursos Naturales 4 (2):215 -222. | |
| General | Asia | |  | | Krisnawati, H., W. C. Adinugroho and R. Imanuddin (2012). Monograph Allometric Models for Estimating Tree Biomass at Vrious Forest Ecosystem Types in Indonesia. Bogor, Indonesia, Research and Development Center for Conservation and Rehabilitation, Forestry Research and Development Agency, Ministry of Forestry. | |
| General | Asia | |  | | Krisnawati, H., W. C. Adinugroho and R. Imanuddin (2012). Monograph Allometric Models for Estimating Tree Biomass at Vrious Forest Ecosystem Types in Indonesia. Bogor, Indonesia, Research and Development Center for Conservation and Rehabilitation, Forestry Research and Development Agency, Ministry of Forestry. | |
| General | Africa | |  | | Mugasha, W. A., Eid, T., BollandsÃ¥s, O. M., Malimbwi, R. E., Chamshama, S. A. O., Zahabu, E. and Katani, J. Z. 2013. Allometric models for prediction of above- and belowground biomass of trees in the miombo woodlands of Tanzania. Forest Ecology and Management 310: 87 â€“ 101. | |
| Aspidosperma spp | South America | |  | | Gaillard de Benitez, C; Pece, M; Juarea de Galindez, M; Maldonado, A; Acosta, V; Gomez, A. 2000. Biomasa aerea de ejemplares de quebracho blanco (Aspidosperma quebracho-blanco) en dos localidades del Parque Chaqueno Seco. Quebracho 9:115-127. | |
| Eucalyptus cladocalyx | Oceania | |  | | Paul, K. I., S. H. Roxburgh, et al. (2013). "Development and testing of allometric equations for estimating above-ground biomass of mixed-species environmental plantings." Forest Ecology and Management 310(0): 483-494. | |
| Eucalyptus alyuberlup | Oceania | |  | | Paul, K. I., S. H. Roxburgh, et al. (2013). "Development and testing of allometric equations for estimating above-ground biomass of mixed-species environmental plantings." Forest Ecology and Management 310(0): 483-494. | |
| Strychnos Wallichiana | Asia | |  | | Lv, X., Tang, J., et al. (2009). "Density and aboveground biomass of lianas in the tropical seasonal rain forests of Xishuangbanna, SW China." Revista de Biologia Tropical 57(1-2): 211-222 | |
| Magonia pubescens | South America | |  | | Salis, S. M., Assis, M. A., Mattos, P. P. and Piao, A. C. S. 2006. Estimating the Aboveground Biomass and Wood Volume of Savanna Woodlands in Brazils Pantanal Wetlands Based on Allometric Correlations. Forest Ecology and Management,(228): 61-68. | |
| General | Oceania | |  | | Liddell, M. J., N. Nieullet, et al. (2007). "Assessing the above-ground biomass of a complex tropical rainforest using a canopy crane." Austral Ecology 32(1): 43-58 | |
| Pinus rigida | North America | |  | | Whittaker, R. H.; Woodwell, G. M. 1968. Dimension and production relations of trees and shrubs in the Brookhaven Forest, New York. Journal of Ecology. 56: 1-25. | |
| Larix Gmelinii Rupr. | Asia | |  | | Wang, C. (2006). "Biomass allometric equations for 10 co-occurring tree species in Chinese temperate forests." Forest Ecology and Management 222(1-3): 9-16 | |
| Eucalyptus falcata | Oceania | |  | | Paul, K. I., S. H. Roxburgh, et al. (2013). "Development and testing of allometric equations for estimating above-ground biomass of mixed-species environmental plantings." Forest Ecology and Management 310(0): 483-494. | |
| Prunus serotina | North America | |  | | Williams, R. A.; McClenahen, J. R. 1984. Biomass prediction equations for seedlings, sprouts, and saplings of ten central hardwood species. Forest Science. 30: 523-527. | |
| Omphalea diandra | North America | |  | | Hughes, F., B. Kauffman y V. Jaramillo. 1999. Biomass, Carbon, and Nutrient Dynamics of Secondary Forests in a humid Tropical Region of Mexico. Ecology 80(6):1892-1907. | |
| Eucalyptus diversicolor | Oceania | |  | | Bi, H., J. Turner, et al. (2004). "Additive biomass equations for native eucalypt forest trees of temperate Australia." Trees 18(4): 467-479 | |
| Eucalyptus camaldulensis | Asia | |  | | Mishra, H.C., Chandra, S.& Khanduja, C.P. 1994. Menagement of Forest Plantation Resources of Central Tarai Forest DivisionUsing Remote Sensing and GIS.75pp . | |
| Eucalyptus tereticornis | Asia | |  | | Singh, V. & Toky, O.P. 1995. Biomass Acacia and net primary productivity and Eucalyptus , (? energy ?) plantations in arid in Leucaena , high density India. Journal of Arid Environments, 31: 301?309. | |
| Picea rubens | North America | |  | | MacLean; D; A; Wein; R; W; 1976; Biomass of jack pine and mixed hardwood stands in northeastern New Brunswick; Canadian Journal of Forest Research; 6; 441-447; | |
| Juglans Mandshurica Maxim. | Asia | |  | | Wang, C. (2006). "Biomass allometric equations for 10 co-occurring tree species in Chinese temperate forests." Forest Ecology and Management 222(1-3): 9-16 | |
| Pinus Koraiensis Sieb. et Zucc. | Asia | |  | | Wang, C. (2006). "Biomass allometric equations for 10 co-occurring tree species in Chinese temperate forests." Forest Ecology and Management 222(1-3): 9-16 | |
| Eucalyptus globulus | North America | |  | | Schubert; T; Strand; R; Cole; T; McDuffie; K; 1988; Equations for predicting biomass of six introduced subtropical tree species; Island of Hawaii; Res; Note PSW-401; Albany; CA; U;S; Department of Agriculture; Forest Service; Pacific Southwest Forest | |
| Hymenolobium nitidum | South America | |  | | Nogueira, E; Fearnside, P; Nelson, B; Barbosa, R; Keizer, E. 2008. Estimates of forest biomass in the Brazilian Amazon: New allometric equations and adjustments to biomass from wood-volume inventories. Forest Ecology and Management 256(11):1853-1867. | |
| Eucalyptus incrassata | Oceania | |  | | Paul, K. I., S. H. Roxburgh, et al. (2013). "Development and testing of allometric equations for estimating above-ground biomass of mixed-species environmental plantings." Forest Ecology and Management 310(0): 483-494. | |
| Acer rubrum | North America | |  | | Crow; T; 1983; Comparing biomass regressions by site and stand age for red maple; Canadian Journal of Forest Research; 13; 283-288; | |
| Quercus humboldtii | South America | |  | | Perez Lara, M; Diaz Timote, J. 2010. Estimacion del carbono contenido en la biomasa forestal aerea de dos bosques andinos en los departamentos de Santander y Cundinamarca. Ing. Forestal. CO., Universidad Distrital Francisco Jose de Caldas. 87 p. p. | |
| Shorea leprosula | Asia | |  | | Krisnawati, H., W. C. Adinugroho and R. Imanuddin (2012). Monograph Allometric Models for Estimating Tree Biomass at Vrious Forest Ecosystem Types in Indonesia. Bogor, Indonesia, Research and Development Center for Conservation and Rehabilitation, Forestry Research and Development Agency, Ministry of Forestry. | |
| Dipterocarpus spp | Asia | |  | | Basuki, T. M., P. E. van Laake, A. K. Skidmore and Y. A. Hussin (2009). "Allometric equations for estimating the above-ground biomass in tropical lowland Dipterocarp forests." Forest Ecology and Management 257(8): 1684-1694 | |
| Eucalyptus camaldulensis | Asia | |  | | Mishra, H.C., Chandra, S.& Khanduja, C.P. 1994. Menagement of Forest Plantation Resources of Central Tarai Forest DivisionUsing Remote Sensing and GIS.75pp . | |
| Populus tremuloides | North America | |  | | Pollard; D; 1972; Above-ground dry matter production in three stands of trembling aspen; Canadian Journal of Forest Research; 2; 27-33; | |
| General | South America | |  | | Schnitzer, S., DeWalt, S. and Chave, J. 2006. Censusing and Measuring Lianas: A Quantitative Comparison of the Common Methods. Biotropica,(38): 581-591. | |
| Gmelina arborea | Asia | |  | | Banaticla, M. R. N., R. F. Sales and R. D. Lasco (2007). "Biomass equations for tropical tree plantation species using secondary data from the Philippines." Annals of Tropical Research 29(3): 73-90. | |
| Eucalyptus miniata | Oceania | |  | | Werner, P. A. and P. G. Murphy (2001). "Size-specific biomass allocation and water content of above- and below-ground components of three <i>Eucalyptus</i> species in a northern Australian savanna." Australian Journal of Botany 49(2): 155-167 | |
| Terminalia amazonia | North America | |  | | Arreaga Gramajo, W. 2002. Almacenamiento del carbono en bosques con manejo forestal sostenible en la Reserva de Biosfera Maya, Peten, Guatemala. Tesis Mag. Sc. Turrialba, CR., CATIE. 86 p. p. | |
| General | Asia | |  | | Krisnawati, H., W. C. Adinugroho and R. Imanuddin (2012). Monograph Allometric Models for Estimating Tree Biomass at Vrious Forest Ecosystem Types in Indonesia. Bogor, Indonesia, Research and Development Center for Conservation and Rehabilitation, Forestry Research and Development Agency, Ministry of Forestry. | |
| Eucalyptus robusta | North America | |  | | Dudley; N; Fownes; J; 1992; Preliminary biomass equations for eight species of fast-growing tropical trees; Journal of Tropical Forest Science; 5; 68-73; | |
| Pinus cembroides | North America | |  | | Whittaker, R. H.; Niering, W. A. 1975. Vegetation of the Santa Catalina Mountains, Arizona. V. Biomass, production, and diversity along the elevation gradient. Ecology. 56: 771-790. | |
| Pinus sylvestris | Europe | |  | | Oleksyn, J., Reich, P.B., Chalupka, W. and Tjoelker, M.G. 1999. Differential above- and below-ground biomass accumulation of European Pinus sylvestris populations in a 12-year-old provenance experiment. Scandinavian Journal of Forest Research (14) 1-17 | |
| Bambusa balcooa | Asia | |  | | Nath, A.J., Das, G. & Das, A.K. 2009. Above ground standing biomass and carbon storage in village bamboos in North East India. Biomass and Bioenergy, 33(9): 1188?1196. | |
| Eucalyptus fastigata | Oceania | |  | | Bi, H., J. Turner, et al. (2004). "Additive biomass equations for native eucalypt forest trees of temperate Australia." Trees 18(4): 467-479 | |
| Eucalyptus pilularis | Oceania | |  | | Bi, H., J. Turner, et al. (2004). "Additive biomass equations for native eucalypt forest trees of temperate Australia." Trees 18(4): 467-479 | |
| Acer rubrum | North America | |  | | MacLean; D; A; Wein; R; W; 1976; Biomass of jack pine and mixed hardwood stands in northeastern New Brunswick; Canadian Journal of Forest Research; 6; 441-447; | |
| Eucalyptus astringens | Oceania | |  | | Paul, K. I., S. H. Roxburgh, et al. (2013). "Development and testing of allometric equations for estimating above-ground biomass of mixed-species environmental plantings." Forest Ecology and Management 310(0): 483-494. | |
| Rhizophora mucronata | Asia | |  | | Krisnawati, H., W. C. Adinugroho and R. Imanuddin (2012). Monograph Allometric Models for Estimating Tree Biomass at Vrious Forest Ecosystem Types in Indonesia. Bogor, Indonesia, Research and Development Center for Conservation and Rehabilitation, Forestry Research and Development Agency, Ministry of Forestry. | |
| Fraxinus Mandshurica Rupr. | Asia | |  | | Wang, C. (2006). "Biomass allometric equations for 10 co-occurring tree species in Chinese temperate forests." Forest Ecology and Management 222(1-3): 9-16 | |
| Bambusa cacharensis | Asia | |  | | Nath, A.J., Das, G. & Das, A.K. 2009. Above ground standing biomass and carbon storage in village bamboos in North East India. Biomass and Bioenergy, 33(9): 1188?1196. | |
| Ficus spp | North America | |  | | RodrÃ­guez R., J. JimÃ©nez, O. Aguirre, E. TreviÃ±o y E. TreviÃ±o. 2006. EstimaciÃ³n de carbono almacenado de niebla en Tamaulipas, MÃ©xico. Ciencia UANL 9(2): 179-188. | |
| Populus deltoides | Asia | |  | | Mishra, H.C., Chandra, S.& Khanduja, C.P. 1994. Menagement of Forest Plantation Resources of Central Tarai Forest DivisionUsing Remote Sensing and GIS.75pp . | |
| Casuarina equisetifolia | Asia | |  | | Rana, B. S., Rao, O. P. & Singh, B.P. 2001. Biomass production in 7 year old plantations of Casuarina equisetifolia on sodic soil. Tropical Ecology, 42(2): 207?212. | |
| Cordia alliodora | North America | |  | | Segura, M., M. Kanninen y D. SuÃ¡rez. 2006. Allometric models for estimating aboveground biomass of shade trees and coffee bushes grown together. Agroforest Syst 68:143-150. | |
| Avicennia spp | North America | |  | | Smith, T. y K. Whelan. 2006. Development of allometric relations for three mangrove species in South Florida for use in the Greater Everglades Ecosystem restoration. Wetlands Ecology and Management 14:409-419. | |
| Eucalyptus phaenophylla | Oceania | |  | | Paul, K. I., S. H. Roxburgh, et al. (2013). "Development and testing of allometric equations for estimating above-ground biomass of mixed-species environmental plantings." Forest Ecology and Management 310(0): 483-494. | |
| Vallea stipularis | South America | |  | | Perez Lara, M; Diaz Timote, J. 2010. Estimacion del carbono contenido en la biomasa forestal aerea de dos bosques andinos en los departamentos de Santander y Cundinamarca. Ing. Forestal. CO., Universidad Distrital Francisco Jose de Caldas. 87 p. p. | |
| Paraserianthes falcataria | Asia | |  | | Krisnawati, H., W. C. Adinugroho and R. Imanuddin (2012). Monograph Allometric Models for Estimating Tree Biomass at Vrious Forest Ecosystem Types in Indonesia. Bogor, Indonesia, Research and Development Center for Conservation and Rehabilitation, Forestry Research and Development Agency, Ministry of Forestry. | |
| General | Asia | |  | | Ketterings, Q. M., R. Coe, M. van Noordwijk, Y. Ambagauâ€™ and C. A. Palm (2001). "Reducing uncertainty in the use of allometric biomass equations for predicting above-ground tree biomass in mixed secondary forests." Forest Ecology and Management 146(1â€“3): 199-209. | |
| Eucalyptus tetrodonta | Oceania | |  | | Werner, P. A. and P. G. Murphy (2001). "Size-specific biomass allocation and water content of above- and below-ground components of three <i>Eucalyptus</i> species in a northern Australian savanna." Australian Journal of Botany 49(2): 155-167 | |
| General | Asia | |  | | Krisnawati, H., W. C. Adinugroho and R. Imanuddin (2012). Monograph Allometric Models for Estimating Tree Biomass at Vrious Forest Ecosystem Types in Indonesia. Bogor, Indonesia, Research and Development Center for Conservation and Rehabilitation, Forestry Research and Development Agency, Ministry of Forestry. | |
| Tectona grandis | Africa | |  | | OÃ†ktingÃ†ati, A. , Monela, G and Dale, T. 1998. The potential of Tectona grandis at mtibwa to act as a carbon sink. Faculty of Forestry Record 67: 156-167. | |
| General | Asia | |  | | Krisnawati, H., W. C. Adinugroho and R. Imanuddin (2012). Monograph Allometric Models for Estimating Tree Biomass at Vrious Forest Ecosystem Types in Indonesia. Bogor, Indonesia, Research and Development Center for Conservation and Rehabilitation, Forestry Research and Development Agency, Ministry of Forestry. | |
| Artocarpus heterophyllus | Asia | |  | | Kumar, B.M., George, S.J., Jamaludheen, V. & Suresh, T.K. 1998. Comparison of biomass production , tree allometry and nutrient use efficiency of multipurpose trees grown in woodlot and silvopastoral experiments in Kerala , India. Forest Ecology and Management, 112: 145?163. | |
| Drimys granatensis | South America | |  | | Perez Lara, M; Diaz Timote, J. 2010. Estimacion del carbono contenido en la biomasa forestal aerea de dos bosques andinos en los departamentos de Santander y Cundinamarca. Ing. Forestal. CO., Universidad Distrital Francisco Jose de Caldas. 87 p. p. | |
| Faramea flavicans | South America | |  | | Perez Lara, M; Diaz Timote, J. 2010. Estimacion del carbono contenido en la biomasa forestal aerea de dos bosques andinos en los departamentos de Santander y Cundinamarca. Ing. Forestal. CO., Universidad Distrital Francisco Jose de Caldas. 87 p. p. | |
| Eucalyptus macarthurii | Oceania | |  | | Paul, K. I., S. H. Roxburgh, et al. (2013). "Development and testing of allometric equations for estimating above-ground biomass of mixed-species environmental plantings." Forest Ecology and Management 310(0): 483-494. | |
| Bambusa cacharensis | Asia | |  | | Nath, A.J., Das, G. & Das, A.K. 2009. Above ground standing biomass and carbon storage in village bamboos in North East India. Biomass and Bioenergy, 33(9): 1188?1196. | |
| Pinus caribaea var. hondurensis | North America | |  | | Aguilar, R.M. 2004. Estimacion del Carbono fijado por plantaciones de Pinus caribaea var. hondurensis en funcion de su edad, en Livingston, Izabal, Guatemala. Tesis de licenciatura en Ingenieria Forestal, Universidad del Valle de Guatemala. Guatemala. 100pp. cited in: Quilo Coronado, A. s.f. Avances de la medicion de carbono en bosques, plantaciones y sistemas agroforestales de Guatemala. GT., Universidad del Valle. 20 p. | |
| Acacia mangium | Asia | |  | | Krisnawati, H., W. C. Adinugroho and R. Imanuddin (2012). Monograph Allometric Models for Estimating Tree Biomass at Vrious Forest Ecosystem Types in Indonesia. Bogor, Indonesia, Research and Development Center for Conservation and Rehabilitation, Forestry Research and Development Agency, Ministry of Forestry. | |
| Quercus laurina | North America | |  | | Tomas, C. 2013. EstimaciÃ³n de biomasa y carbono medinte ecuaciones alometricas en Quercus laurina Humb. y Quercus rugosa NÃ©e en predios bajo manejo del ejido San Pablo Ixayoc, Estado de MÃ©xico. Universidad AutÃ³noma Chapingo. MÃ©xico. 54 p. | |
| Quercus rugosa | North America | |  | | Tomas, C. 2013. EstimaciÃ³n de biomasa y carbono medinte ecuaciones alometricas en Quercus laurina Humb. y Quercus rugosa NÃ©e en predios bajo manejo del ejido San Pablo Ixayoc, Estado de MÃ©xico. Universidad AutÃ³noma Chapingo. MÃ©xico. 54 p. | |
| Terminalia amazonia | North America | |  | | Arreaga Gramajo, W. 2002. Almacenamiento del carbono en bosques con manejo forestal sostenible en la Reserva de Biosfera Maya, Peten, Guatemala. Tesis Mag. Sc. Turrialba, CR., CATIE. 86 p. p. | |
| Quercus Aquifolioides | Asia | |  | | Liu, X., Liu, S., et al. (2006). "Aboveground Biomass of Quercus aquifolioides Shrub Community and Its Responses to Altitudinal Gradients in Balangshan Mountain, Shichuan Province." Scientia Silvae Sinicae 42(2):1-7 | |
| Eucalyptus pluricaulis | Oceania | |  | | Paul, K. I., S. H. Roxburgh, et al. (2013). "Development and testing of allometric equations for estimating above-ground biomass of mixed-species environmental plantings." Forest Ecology and Management 310(0): 483-494. | |
| Olneya tesota | North America | |  | | Martin; J; Kloeppel; B; Schaefer; T; Kimbler; D; McNulty; S; 1998; Aboveground biomass and nitrogen allocation of ten deciduous southern Appalachian tree species; Canadian Journal of Forest Research; 28; 1648-1659; | |
| Piliostigma thonningii | Africa | |  | | Manlay, R.J., Kaire, M., Masse, D., Chotte, J.-L., Ciornei, G. and Floret, C. 2002. Carbon, nitrogen and phosphorus allocation in agro-ecosystems of a West African savanna I. The plant component under semi-permanent cultivation. Agriculture, Ecosystems and Environment 88: 215-232. | |
| Acacia mangium | Asia | |  | | Tsai, L. M. (1986). "Biomass and productivity of 4.5 year-old Acacia mangium in Sarawak." Pertanika 9(1): 81-87. | |
| Pseudotsuga menziesii | North America | |  | | Barclay; H; Pang; P; Pollard; D; 1986; Aboveground biomass distribution within trees and stands in thinned and fertilized Douglas-fir; Canadian Journal of Forest Research; 16; 438-442; | |
| Terminalia amazonia | North America | |  | | Arreaga Gramajo, W. 2002. Almacenamiento del carbono en bosques con manejo forestal sostenible en la Reserva de Biosfera Maya, Peten, Guatemala. Tesis Mag. Sc. Turrialba, CR., CATIE. 86 p. p. | |
| Hevea brasiliensis | Asia | |  | | Krisnawati, H., W. C. Adinugroho and R. Imanuddin (2012). Monograph Allometric Models for Estimating Tree Biomass at Vrious Forest Ecosystem Types in Indonesia. Bogor, Indonesia, Research and Development Center for Conservation and Rehabilitation, Forestry Research and Development Agency, Ministry of Forestry. | |
| Acacia mangium | Asia | |  | | Krisnawati, H., W. C. Adinugroho and R. Imanuddin (2012). Monograph Allometric Models for Estimating Tree Biomass at Vrious Forest Ecosystem Types in Indonesia. Bogor, Indonesia, Research and Development Center for Conservation and Rehabilitation, Forestry Research and Development Agency, Ministry of Forestry. | |
| Rhizophora mucronata | Africa | |  | | Kirui B., Kairo J.G., Karachi M. 2006. Allometric equations for estimating above ground biomass of Rhizophora mucronata Lamk. (Rhizophoraceae) mangroves at Gazi Bay, Kenya.Western Indian Ocean J. Marine Science.5:27-34 | |
| Eucalyptus dalrympleana | Oceania | |  | | Bi, H., J. Turner, et al. (2004). "Additive biomass equations for native eucalypt forest trees of temperate Australia." Trees 18(4): 467-479 | |
| Clusia cruciata | South America | |  | | Perez Lara, M; Diaz Timote, J. 2010. Estimacion del carbono contenido en la biomasa forestal aerea de dos bosques andinos en los departamentos de Santander y Cundinamarca. Ing. Forestal. CO., Universidad Distrital Francisco Jose de Caldas. 87 p. p. | |
| Terminalia argentea | South America | |  | | Salis, S. M., Assis, M. A., Mattos, P. P. and Piao, A. C. S. 2006. Estimating the Aboveground Biomass and Wood Volume of Savanna Woodlands in Brazils Pantanal Wetlands Based on Allometric Correlations. Forest Ecology and Management,(228): 61-68. | |
| Paraserianthes falcataria | Asia | |  | | Krisnawati, H., W. C. Adinugroho and R. Imanuddin (2012). Monograph Allometric Models for Estimating Tree Biomass at Vrious Forest Ecosystem Types in Indonesia. Bogor, Indonesia, Research and Development Center for Conservation and Rehabilitation, Forestry Research and Development Agency, Ministry of Forestry. | |
| Clusia hilariana | South America | |  | | Dias, A. T. C., de Mattos, E. A., Vieira, S. A., Azeredo, J. V. and Scarano, F. R. 2006. Aboveground Biomass Stock of Native Woodland on a Brazilian Sandy Coastal Plain: Estimates Based on the Dominant Tree Species. Forest Ecology and Management,(226): 364-367. | |
| Eucalyptus spp | Europe | |  | | Menguzzato, G. 1988. Modelli di previsione del peso fresco, della biomassa e del volume per pino insigne ed eucalitti nell'Azienda Massanova (Salerno). Ann. Ist. Sper. Selvicoltura (19) 323-354 | |
| Terminalia amazonia | North America | |  | | Arreaga Gramajo, W. 2002. Almacenamiento del carbono en bosques con manejo forestal sostenible en la Reserva de Biosfera Maya, Peten, Guatemala. Tesis Mag. Sc. Turrialba, CR., CATIE. 86 p. p. | |
| Eucalyptus camaldulensis | Asia | |  | | Mishra, H.C., Chandra, S.& Khanduja, C.P. 1994. Menagement of Forest Plantation Resources of Central Tarai Forest DivisionUsing Remote Sensing and GIS.75pp . | |
| Quercus spp | North America | |  | | RodrÃ­guez R., J. JimÃ©nez, J. Meza, O. Aguirre y R. Razo. 2008. Carbono contenido en un bosque tropical subcaducifolio en la reserva de la biosfera el cielo, Tamaulipas, MÃ©xico. Revista Latinoamericana de Recursos Naturales 4 (2):215 -222. | |
| Aphananthe monoica | North America | |  | | RodrÃ­guez R., J. JimÃ©nez, J. Meza, O. Aguirre y R. Razo. 2008. Carbono contenido en un bosque tropical subcaducifolio en la reserva de la biosfera el cielo, Tamaulipas, MÃ©xico. Revista Latinoamericana de Recursos Naturales 4 (2):215 -222. | |
| Alfaroa colombiana | South America | |  | | Perez Lara, M; Diaz Timote, J. 2010. Estimacion del carbono contenido en la biomasa forestal aerea de dos bosques andinos en los departamentos de Santander y Cundinamarca. Ing. Forestal. CO., Universidad Distrital Francisco Jose de Caldas. 87 p. p. | |
| General | Asia | |  | | Krisnawati, H., W. C. Adinugroho and R. Imanuddin (2012). Monograph Allometric Models for Estimating Tree Biomass at Vrious Forest Ecosystem Types in Indonesia. Bogor, Indonesia, Research and Development Center for Conservation and Rehabilitation, Forestry Research and Development Agency, Ministry of Forestry. | |
| Eucalyptus flocktoniae | Oceania | |  | | Paul, K. I., S. H. Roxburgh, et al. (2013). "Development and testing of allometric equations for estimating above-ground biomass of mixed-species environmental plantings." Forest Ecology and Management 310(0): 483-494. | |
| Quercus rubra | North America | |  | | Martin; J; Kloeppel; B; Schaefer; T; Kimbler; D; McNulty; S; 1998; Aboveground biomass and nitrogen allocation of ten deciduous southern Appalachian tree species; Canadian Journal of Forest Research; 28; 1648-1659; | |
| Aniba cinnamomiflora | South America | |  | | Perez Lara, M; Diaz Timote, J. 2010. Estimacion del carbono contenido en la biomasa forestal aerea de dos bosques andinos en los departamentos de Santander y Cundinamarca. Ing. Forestal. CO., Universidad Distrital Francisco Jose de Caldas. 87 p. p. | |
| Juniperus osteospperma | North America | |  | | Chojnacky; D; 1984; Volume and biomass for curlleaf cercocarpus in Nevada; Res; Pap; INT-332; Ogden; UT; U;S; Department of Agriculture; Forest Service; Intermountain Forest and Range Experiment Station; | |
| Eucalyptus agglomerata | Oceania | |  | | Bi, H., J. Turner, et al. (2004). "Additive biomass equations for native eucalypt forest trees of temperate Australia." Trees 18(4): 467-479 | |
| Diplostephium rosmarinifolium | South America | |  | | Perez Lara, M; Diaz Timote, J. 2010. Estimacion del carbono contenido en la biomasa forestal aerea de dos bosques andinos en los departamentos de Santander y Cundinamarca. Ing. Forestal. CO., Universidad Distrital Francisco Jose de Caldas. 87 p. p. | |
| Diplostephium rosmarinifolium | South America | |  | | Perez Lara, M; Diaz Timote, J. 2010. Estimacion del carbono contenido en la biomasa forestal aerea de dos bosques andinos en los departamentos de Santander y Cundinamarca. Ing. Forestal. CO., Universidad Distrital Francisco Jose de Caldas. 87 p. p. | |
| Juniperus osteospperma | North America | |  | | Miller; E; Meeuwig; R; Budy; J; 1981; Biomass of singleleaf pinyon and Utah juniper; Res; Pap; INT- 273; Ogden; UT; U;S; Department of Agriculture; Forest Service; Intermountain Forest and Range Experiment Station; | |
| Eucalyptus ferdinandiana | Oceania | |  | | Williams, R. J., A. Zerihun, et al. (2005). "Allometry for estimating aboveground tree biomass in tropical and subtropical eucalypt woodlands: towards general predictive equations." Australian Journal of Botany 53(7): 607-619 | |
| General | South America | |  | | Alvarez E., 1993. Composicion floristica, diversidad, estructura y biomasa de un bosque inundable en la Amazonia Colombiana. Tesis de Maestria en Biologia, Universidad de Antioquia, Facultad de Ciencias Naturales y Exactas, Medellin, Colombia cited in: Navar. J. 2009. Biomass component equations for Latin American species and groups of species -Online material. Annual of Forest Sciences 66(208). | |
| Populus tremuloides | North America | |  | | Campbell; J; S; Lieffers; V; J; Pielou; E; C; 1985; Regression equations for estimating single tree biomass of trembling aspen; assessing their applicability to more than one population; Forest Ecology and Management; 11; 283-295; | |
| Corymbia maculata | Oceania | |  | | Paul, K. I., S. H. Roxburgh, et al. (2013). "Development and testing of allometric equations for estimating above-ground biomass of mixed-species environmental plantings." Forest Ecology and Management 310(0): 483-494. | |
| Pinus pseudostrobus | North America | |  | | Aguirre, O. y J. JimÃ©nez. 2011. EvaluaciÃ³n del contenido de carbono en bosques del sur de Nuevo LeÃ³n. Revista Mexicana de Ciencias Forestales 2 (6): 73-83. | |
| Vochysia ferruginea | North America | |  | | Montero, M. M. and Montagnini, F. 2004. Modelos Alometricos Para La Estimacion De Biomasa De Diez Especies Nativas En Plantaciones En La Region Atlantica De Costa Rica. Recursos Naturales y Ambiente,(45): 112-119. | |
| Pseudotsuga menziesii | North America | |  | | Espinosa-Bancalari; M; Perry; D; 1987; Distribution and increment of biomass in adjacent young Douglas-fir stands with different early growth rates; Canadian Journal of Forest Research; 17; 722-730; | |
| Acacia mangium | Asia | |  | | Miyakuni, K., I. Heriansyah, N. M. Heriyanto and Y. Kiyono (2004). "Allometric biomass equations, biomas expansion factors and root-to-shoot ratios of planted Acacia mangium Willd. Forests in West Java, Indonesia." Japan Society of Forest Planning 10: 69-76. | |
| Shorea parvifolia | Asia | |  | | Krisnawati, H., W. C. Adinugroho and R. Imanuddin (2012). Monograph Allometric Models for Estimating Tree Biomass at Vrious Forest Ecosystem Types in Indonesia. Bogor, Indonesia, Research and Development Center for Conservation and Rehabilitation, Forestry Research and Development Agency, Ministry of Forestry. | |
| Viola macrocarpa | South America | |  | | Perez Lara, M; Diaz Timote, J. 2010. Estimacion del carbono contenido en la biomasa forestal aerea de dos bosques andinos en los departamentos de Santander y Cundinamarca. Ing. Forestal. CO., Universidad Distrital Francisco Jose de Caldas. 87 p. p. | |
| Viola macrocarpa | South America | |  | | Perez Lara, M; Diaz Timote, J. 2010. Estimacion del carbono contenido en la biomasa forestal aerea de dos bosques andinos en los departamentos de Santander y Cundinamarca. Ing. Forestal. CO., Universidad Distrital Francisco Jose de Caldas. 87 p. p. | |
| Dalbergia sissoo | Asia | |  | | Lodhiyal, N., Lodhiyal, L.S. & Pangtey, Y.P. 2002. Structure and function of Shisham forests in central Himalaya , India?: Dry matter dynamics. Annals of Botony, 89: 41?54. | |
| Pinus sylvestris | Europe | |  | | Brakke, F.H. 1986. Distribution and yield of biomass from young Pinus sylvestris and Picea abies stands on draines and fertilized peatland. Scandinavian Journal of Forest Research (1) 49-66 | |
| Pinus sylvestris | Europe | |  | | Brakke, F.H. 1986. Distribution and yield of biomass from young Pinus sylvestris and Picea abies stands on draines and fertilized peatland. Scandinavian Journal of Forest Research (1) 49-66 | |
| Tsuga heterophylla | North America | |  | | Krumlik; G; J; Kimmins; J; P; 1973; Studies of biomass distribution and tree form in old virgin forests in the mountains of south coastal British Columbia; Canada; In; Young; H; ed; IUFRO biomass studies; Nancy; France and Vancouver; BC; Orono; ME; Univ | |
| Sterigmapetalum tachirensis | South America | |  | | Perez Lara, M; Diaz Timote, J. 2010. Estimacion del carbono contenido en la biomasa forestal aerea de dos bosques andinos en los departamentos de Santander y Cundinamarca. Ing. Forestal. CO., Universidad Distrital Francisco Jose de Caldas. 87 p. p. | |
| Dipterocarpus kerrii | Asia | |  | | Krisnawati, H., W. C. Adinugroho and R. Imanuddin (2012). Monograph Allometric Models for Estimating Tree Biomass at Vrious Forest Ecosystem Types in Indonesia. Bogor, Indonesia, Research and Development Center for Conservation and Rehabilitation, Forestry Research and Development Agency, Ministry of Forestry. | |
| Quercus ilex | Europe | |  | | Lim, M.T. and J.E., C. 1986. The internal transfer of nutrients in a Scots pine stand: biomass components, current growth and their nutrient content. Forestry (59) 1-27 | |
| Sterigmapetalum tachirensis | South America | |  | | Perez Lara, M; Diaz Timote, J. 2010. Estimacion del carbono contenido en la biomasa forestal aerea de dos bosques andinos en los departamentos de Santander y Cundinamarca. Ing. Forestal. CO., Universidad Distrital Francisco Jose de Caldas. 87 p. p. | |
| Shorea leprosula | Asia | |  | | Krisnawati, H., W. C. Adinugroho and R. Imanuddin (2012). Monograph Allometric Models for Estimating Tree Biomass at Vrious Forest Ecosystem Types in Indonesia. Bogor, Indonesia, Research and Development Center for Conservation and Rehabilitation, Forestry Research and Development Agency, Ministry of Forestry. | |
| Cotylelobium burckii | Asia | |  | | Krisnawati, H., W. C. Adinugroho and R. Imanuddin (2012). Monograph Allometric Models for Estimating Tree Biomass at Vrious Forest Ecosystem Types in Indonesia. Bogor, Indonesia, Research and Development Center for Conservation and Rehabilitation, Forestry Research and Development Agency, Ministry of Forestry. | |
| Acacia mangium | Asia | |  | | Miyakuni, K., I. Heriansyah, N. M. Heriyanto and Y. Kiyono (2004). "Allometric biomass equations, biomas expansion factors and root-to-shoot ratios of planted Acacia mangium Willd. Forests in West Java, Indonesia." Japan Society of Forest Planning 10: 69-76. | |
| Eucalyptus platypus | Oceania | |  | | Paul, K. I., S. H. Roxburgh, et al. (2013). "Development and testing of allometric equations for estimating above-ground biomass of mixed-species environmental plantings." Forest Ecology and Management 310(0): 483-494. | |
| Gmelina arborea | Africa | |  | | Onyekwelu, J.C. 2004. Above-ground biomass production and biomass equations for even-aged Gmelina arborea (ROXB) plantations in south-western Nigeria. Biomass and Bioenergy 26: 39-46 | |
| Populus tremuloides | North America | |  | | Campbell; J; S; Lieffers; V; J; Pielou; E; C; 1985; Regression equations for estimating single tree biomass of trembling aspen; assessing their applicability to more than one population; Forest Ecology and Management; 11; 283-295; | |
| Eucalyptus muelleriana | Oceania | |  | | Bi, H., J. Turner, et al. (2004). "Additive biomass equations for native eucalypt forest trees of temperate Australia." Trees 18(4): 467-479 | |
| Eucalyptus tereticornis | Asia | |  | | Singh, V. & Toky, O.P. 1995. Biomass Acacia and net primary productivity and Eucalyptus , (? energy ?) plantations in arid in Leucaena , high density India. Journal of Arid Environments, 31: 301?309. | |
| Pinus merkusii | Asia | |  | | Krisnawati, H., W. C. Adinugroho and R. Imanuddin (2012). Monograph Allometric Models for Estimating Tree Biomass at Vrious Forest Ecosystem Types in Indonesia. Bogor, Indonesia, Research and Development Center for Conservation and Rehabilitation, Forestry Research and Development Agency, Ministry of Forestry. | |
| Schima wallichii | Asia | |  | | Krisnawati, H., W. C. Adinugroho and R. Imanuddin (2012). Monograph Allometric Models for Estimating Tree Biomass at Vrious Forest Ecosystem Types in Indonesia. Bogor, Indonesia, Research and Development Center for Conservation and Rehabilitation, Forestry Research and Development Agency, Ministry of Forestry. | |
| Acacia nilotica | Asia | |  | | Singh, V. & Toky, O.P. 1995. Biomass Acacia and net primary productivity and Eucalyptus , (? energy ?) plantations in arid in Leucaena , high density India. Journal of Arid Environments, 31: 301?309. | |
| Pinus teocote | North America | |  | | RodrÃ­guez R., J. JimÃ©nez, O. Aguirre, E. TreviÃ±o y R. Razo. 2009. EstimaciÃ³n de carbono almacenado en el bosque de pino-encino en la Reserva de la Biosfera el Cielo, Tamaulipas, MÃ©xico. Ra Ximhai 5 (3): 317-327. | |
| Quercus rubra | North America | |  | | Chapman; J; Gower; S; 1991; Aboveground production and canopy dynamics in sugar maple and red oak trees in southwestern Wisconsin; Canadian Journal of Forest Research; 21; 1533-1543; | |
| Weinmannia tomentosa | South America | |  | | Perez Lara, M; Diaz Timote, J. 2010. Estimacion del carbono contenido en la biomasa forestal aerea de dos bosques andinos en los departamentos de Santander y Cundinamarca. Ing. Forestal. CO., Universidad Distrital Francisco Jose de Caldas. 87 p. p. | |
| Acer rubrum | North America | |  | | Ker, M. 1980, Tree biomass equations for seven species in southwestern New Brunswick, Inf. Rep. No. M-X-114, Fredericton, NS, Canadian Forestry Service, Maritime Forest Research Center | |
| Aspidosperma spp | South America | |  | | Gaillard de Benitez, C., Pece, M., Juarea de Galindez, M., Maldonado, A., Acosta, V. and Gomez, A. 2000. Biomasa Aerea De Ejemplares De Quebracho Blanco (Aspidosperma Quebracho-Blanco) En Dos Localidades Del Parque Chaqueno Seco. Quebracho,(9): 115-127. | |
| Aspidosperma spp | South America | |  | | Gaillard de Benitez, C., Pece, M., Juarea de Galindez, M., Maldonado, A., Acosta, V. and Gomez, A. 2000. Biomasa Aerea De Ejemplares De Quebracho Blanco (Aspidosperma Quebracho-Blanco) En Dos Localidades Del Parque Chaqueno Seco. Quebracho,(9): 115-127. | |
| Abies magnifica | North America | |  | | Westman, W. 1987. Aboveground biomass, surface area, and production relations of red fir (Abies magnifica) and white fir (A. concolor). Canadian Journal of Forest Research. 17: 311-319. | |
| Fagus sylvatica | Europe | |  | | Pretzsch, H. 2000. Die Regeln von Reineke, Yoda und das Gesetz der raumlichen Allometrie. Allgemeine Forst- und Jagd-Zeitung (171) 205-210 | |
| Eucalyptus obliqua | Oceania | |  | | Bi, H., J. Turner, et al. (2004). "Additive biomass equations for native eucalypt forest trees of temperate Australia." Trees 18(4): 467-479 | |
| Picea mariana | North America | |  | | Moore; T; R; Verspoor; E; 1973; Aboveground biomass of black spruce stands in subarctic Quebec; Canadian Journal of Forest Research; 3; 596-598; | |
| Acacia mangium | Asia | |  | | Krisnawati, H., W. C. Adinugroho and R. Imanuddin (2012). Monograph Allometric Models for Estimating Tree Biomass at Vrious Forest Ecosystem Types in Indonesia. Bogor, Indonesia, Research and Development Center for Conservation and Rehabilitation, Forestry Research and Development Agency, Ministry of Forestry. | |
| Araucaria angustifolia | South America | |  | | Farinha Watzlawick, L. 2003. Estimativa De Biomasa E Carbono Em Floresta Ombrofila Mista E Plantacoes Florestais a Partir De Dados De Imagens Do Satelite Ikono Ii. UFPR, BR. | |
| Bambusa balcooa | Asia | |  | | Nath, A.J., Das, G. & Das, A.K. 2009. Above ground standing biomass and carbon storage in village bamboos in North East India. Biomass and Bioenergy, 33(9): 1188?1196. | |
| Carpinus caroliniana | North America | |  | | RodrÃ­guez R., J. JimÃ©nez, O. Aguirre, E. TreviÃ±o y E. TreviÃ±o. 2006. EstimaciÃ³n de carbono almacenado de niebla en Tamaulipas, MÃ©xico. Ciencia UANL 9(2): 179-188. | |
| Acacia mearnsii | Oceania | |  | | Paul, K. I., S. H. Roxburgh, et al. (2013). "Development and testing of allometric equations for estimating above-ground biomass of mixed-species environmental plantings." Forest Ecology and Management 310(0): 483-494. | |
| Bejaria resinosa | South America | |  | | Perez Lara, M; Diaz Timote, J. 2010. Estimacion del carbono contenido en la biomasa forestal aerea de dos bosques andinos en los departamentos de Santander y Cundinamarca. Ing. Forestal. CO., Universidad Distrital Francisco Jose de Caldas. 87 p. p. | |
| Pinus maximinoi | North America | |  | | GonzÃ¡lez, M. 2008. EstimaciÃ³n de la biomasa aÃ©rea y la captura de carbono en regeneraciÃ³n natural de Pinus maximinoi H. E. Moore, Pinus oocarpa var. ochoterenai Mtz. Y Quercus sp. en el norte del Estado de Chiapas, MÃ©xico. Tesis de MaestrÃ­a. Centro AgronÃ³mico Tropical de investigaciÃ³n y EnseÃ±anza. Costa Rica. 81 p. | |
| Shorea leprosula | Asia | |  | | Krisnawati, H., W. C. Adinugroho and R. Imanuddin (2012). Monograph Allometric Models for Estimating Tree Biomass at Vrious Forest Ecosystem Types in Indonesia. Bogor, Indonesia, Research and Development Center for Conservation and Rehabilitation, Forestry Research and Development Agency, Ministry of Forestry. | |
| Pinus patula | North America | |  | | Castellanos, J., A. VelÃ¡zquez, J. Vargas, C. RodrÃ­guez y A. Fierros. 1996. ProducciÃ³n de biomasa en un rodal de Pinus patula. Agrociencia 30(1):123-128. | |
| Lysiloma divaricatum | North America | |  | | GÃ³mez, J. 2008. DeterminaciÃ³n de los almacenes de carbono en los compartimentos aÃ¨reo y subterrÃ neo de dos tios de vegetaciÃ³n en la reserva de la bÃ³sfera"Sierra de Huatla", Morelos, MÃ©xico. Tesis Doctoral . Colegio de Postgraduados. MÃ©xico. 194p. | |
| Inga vera | North America | |  | | Acosta, M., J. Vargas, A. VelÃ¡zquez y J. Etchevers. 2002. EstimaciÃ³n de la biomasa aÃ©rea mediante el uso de relaciones alomÃ©tricas en seis especies arbÃ³reas en Oaxaca, MÃ©xico. Agrociencia 36(6): 725-736. | |
| Juniperus flaccida | North America | |  | | RodrÃ­guez, R., J. JÃ­menez, O. Aguirre y E. Jurado. 2007. Ecuaciones alomÃ©tricas para estimar biomasa aÃ©rea en especies de encino y pino en Iturbide,N.L. Ciencia Forestal en MÃ©xico 32(1): 39-56. | |
| Guazuma ulmifolia | North America | |  | | Douterlungne, D. 2013. Ãrboles de rÃ¡pido crecimiento para la restauraciÃ³n ecolÃ³gica y la captura de carbono en el trÃ³pico hÃºmedo de MÃ©xico. Tesis de Doctorado. El Colegio de la Frontera Sur. MÃ©xico. 83 p. | |
| Laguncularia racemosa | North America | |  | | Day, J., W. Conner, F. Ley-Lou, R. Day y A. Machado. 1987. The productivity and composition of mangrove forests, Laguna de TÃ©rminos, MÃ©xico. Aquatic Botany 27: 267-284. | |
| Avicennia germinans | North America | |  | | Day, J., W. Conner, F. Ley-Lou, R. Day y A. Machado. 1987. The productivity and composition of mangrove forests, Laguna de TÃ©rminos, MÃ©xico. Aquatic Botany 27: 267-284. | |
| Quercus magnoliifolia | North America | |  | | GÃ³mez, J. 2008. DeterminaciÃ³n de los almacenes de carbono en los compartimentos aÃ¨reo y subterrÃ neo de dos tios de vegetaciÃ³n en la reserva de la bÃ³sfera"Sierra de Huatla", Morelos, MÃ©xico. Tesis Doctoral . Colegio de Postgraduados. MÃ©xico. 194p. | |
| Rhizophora mangle | North America | |  | | Day, J., W. Conner, F. Ley-Lou, R. Day y A. Machado. 1987. The productivity and composition of mangrove forests, Laguna de TÃ©rminos, MÃ©xico. Aquatic Botany 27: 267-284. | |
| Euphorbia schlechtendalii | North America | |  | | GÃ³mez, J. 2008. DeterminaciÃ³n de los almacenes de carbono en los compartimentos aÃ¨reo y subterrÃ neo de dos tios de vegetaciÃ³n en la reserva de la bÃ³sfera"Sierra de Huatla", Morelos, MÃ©xico. Tesis Doctoral . Colegio de Postgraduados. MÃ©xico. 194p. | |
| Eucalyptus fasciculosa | Oceania | |  | | Paul, K. I., S. H. Roxburgh, et al. (2013). "Development and testing of allometric equations for estimating above-ground biomass of mixed-species environmental plantings." Forest Ecology and Management 310(0): 483-494. | |
| Myrospermum frutescens | North America | |  | | Rojas-GarcÃ­a, F., P. MartÃ­nez-Zurimendi, M. OlguÃ­n y B. De Jong. 2009. Ecuaciones alomÃ©tricas para estimar biomasa aÃ©rea en MÃ©xico. ECOSUR-CONAFOR. InÃ©dito. | |
| Tectona grandis | Asia | |  | | Krisnawati, H., W. C. Adinugroho and R. Imanuddin (2012). Monograph Allometric Models for Estimating Tree Biomass at Vrious Forest Ecosystem Types in Indonesia. Bogor, Indonesia, Research and Development Center for Conservation and Rehabilitation, Forestry Research and Development Agency, Ministry of Forestry. | |
| Pinus teocote | North America | |  | | DomÃ­nguez, G., O. Aguirre, J. JimÃ©nez,R. RodrÃ­guezy J. DÃ­az. 2009. Biomasa aÃ©rea y factores de expansiÃ³n de especies arbÃ³reas en bosques del sur de Nuevo LeÃ³n. Revista Chapingo Serie Ciencias Forestales y del Ambiente 15(1): 59-64. | |
| General | Asia | |  | | Krisnawati, H., W. C. Adinugroho and R. Imanuddin (2012). Monograph Allometric Models for Estimating Tree Biomass at Vrious Forest Ecosystem Types in Indonesia. Bogor, Indonesia, Research and Development Center for Conservation and Rehabilitation, Forestry Research and Development Agency, Ministry of Forestry. | |
| Cupressus macrocarpa | Asia | |  | | Kunhamu, T. K., Kumar, B.M.& and Samuel, S. 2011. Does tree management affect biomass and soil carbon stocks of Acacia mangium Wild.stands in Kerala,India. Carbon Sequestration Potential of Agroforestry Systems: Opportunities and Challenges, 8: 217?228. http://www.springerlink.com/index/10.1007/978-94-007-1630-8. | |
| Pinus teocote | North America | |  | | NÃ¡var, J. 2009. Allometric equations for tree species and carbon stocks for forests of northwestern Mexico.Forest Ecology and Management 257:427-434 | |
| Juniperus flaccida | North America | |  | | RodrÃ­guez R., J. JimÃ©nez, O. Aguirre, E. TreviÃ±o y R. Razo. 2009. EstimaciÃ³n de carbono almacenado en el bosque de pino-encino en la Reserva de la Biosfera el Cielo, Tamaulipas, MÃ©xico. Ra Ximhai 5 (3): 317-327. | |
| Leucaena leucocephala | Asia | |  | | Singh, V. & Toky, O.P. 1995. Biomass Acacia and net primary productivity and Eucalyptus , (? energy ?) plantations in arid in Leucaena , high density India. Journal of Arid Environments, 31: 301?309. | |
| Acacia baileyana | Oceania | |  | | Paul, K. I., S. H. Roxburgh, et al. (2013). "Development and testing of allometric equations for estimating above-ground biomass of mixed-species environmental plantings." Forest Ecology and Management 310(0): 483-494. | |
| Guiera senegalensis | Africa | |  | | Alegria, J., Heermans, J.G. and Minnick, G. 1986. A sampling system for determining fuelwood for Combretaceae at the Guesselbodi National Forest. Ministere de l'hydraulique et de l'environnement Direction des Forets et Faune, Niamey, Niger. | |
| Eucalyptus platypus | Oceania | |  | | Jonson, J. H. and D. Freudenberger (2011). "Restore and sequester: Estimating biomass in native Australian woodland ecosystems for their carbon-funded restoration." Australian Journal of Botany 59(7): 639-652 | |
| Cinnamomum camphora | Asia | |  | | Singh, R. & Negi, J.D.S. 1997. Biomass prediction and distribution of organic matter in natural Cinnamomum camphora stand. Indian Forester, 123(12): 1161?1170. | |
| Clusia shomburgkiana | South America | |  | | Perez Lara, M; Diaz Timote, J. 2010. Estimacion del carbono contenido en la biomasa forestal aerea de dos bosques andinos en los departamentos de Santander y Cundinamarca. Ing. Forestal. CO., Universidad Distrital Francisco Jose de Caldas. 87 p. p. | |
| Eucalyptus occidentalis | Oceania | |  | | Jonson, J. H. and D. Freudenberger (2011). "Restore and sequester: Estimating biomass in native Australian woodland ecosystems for their carbon-funded restoration." Australian Journal of Botany 59(7): 639-652 | |
| Eucalyptus largiflorens | Oceania | |  | | Paul, K. I., S. H. Roxburgh, et al. (2013). "Development and testing of allometric equations for estimating above-ground biomass of mixed-species environmental plantings." Forest Ecology and Management 310(0): 483-494. | |
| Acer saccharum | North America | |  | | Williams, R. A.; McClenahen, J. R. 1984. Biomass prediction equations for seedlings, sprouts, and saplings of ten central hardwood species. Forest Science. 30: 523-527. | |
| Acer saccharum | North America | |  | | Crow; T; 1976; Biomass and production regressions for trees and woody shrubs common to the Enterprise Forest; In; Zavitkovski; J; ed; The Enterprise radiation forest; Radioecological studies; Rep; TID-26113-P2; Washington; DC; U;S; Energy Research and De | |
| Acer rubrum | North America | |  | | Crow; T; 1976; Biomass and production regressions for trees and woody shrubs common to the Enterprise Forest; In; Zavitkovski; J; ed; The Enterprise radiation forest; Radioecological studies; Rep; TID-26113-P2; Washington; DC; U;S; Energy Research and De | |
| Fraxinus Mandshurica Rupr. | Asia | |  | | Wang, C. (2006). "Biomass allometric equations for 10 co-occurring tree species in Chinese temperate forests." Forest Ecology and Management 222(1-3): 9-16 | |
| Hesperomeles goudotiana | South America | |  | | Perez Lara, M; Diaz Timote, J. 2010. Estimacion del carbono contenido en la biomasa forestal aerea de dos bosques andinos en los departamentos de Santander y Cundinamarca. Ing. Forestal. CO., Universidad Distrital Francisco Jose de Caldas. 87 p. p. | |
| Drimys granatensis | South America | |  | | Perez Lara, M; Diaz Timote, J. 2010. Estimacion del carbono contenido en la biomasa forestal aerea de dos bosques andinos en los departamentos de Santander y Cundinamarca. Ing. Forestal. CO., Universidad Distrital Francisco Jose de Caldas. 87 p. p. | |
| General | South America | |  | | Pereira Da Silva, R. 2007. Alometria, estoque e dinamica da biomassa de florestas primarias e secundarias na Regiao de Manaus (am). Manaus,, UFAM; INPA. 152 p. | |
| Acacia mearnsii | Oceania | |  | | Forrester, D. I., J. Bauhus, et al. (2004). "Growth dynamics in a mixed-species plantation of Eucalyptus globulus and Acacia mearnsii." Forest Ecology and Management 193(1â€“2): 81-95. | |
| Rhizophora apiculata | Asia | |  | | Chandra, L. A., G. Seca and M. K. Abu Hena (2011). "Aboveground Biomass Production of Rhizophora apiculata Blume in Sarawak Mangrove Forest." American Journal of Agricultural and Biological Sciences 6(4): 469-474. | |
| Virola koschnyi | North America | |  | | Montero, M. M. and Montagnini, F. 2004. Modelos Alometricos Para La Estimacion De Biomasa De Diez Especies Nativas En Plantaciones En La Region Atlantica De Costa Rica. Recursos Naturales y Ambiente,(45): 112-119. | |
| Cunninghamia Lanceolata | Asia | |  | | Zhang, G., Li, X., et al. (2012). "Biomass characteristics of dominent tree species (group) at Lingnan forest farm in Anhui Province." Scientia Silvae Sincae 48(5): 136-140 | |
| Eucalyptus eucalyptus hybrid | Asia | |  | | Tandon, V.N., Rawat, J.K. & Singh, R. 1993. Biomass and mineral cycling in plantation ecosystems of Eucaliptus hybrid in Haryana. Indian Forester, 119(3): 232?237. | |
| Eucalyptus urophylla | North America | |  | | Schubert; T; Strand; R; Cole; T; McDuffie; K; 1988; Equations for predicting biomass of six introduced subtropical tree species; Island of Hawaii; Res; Note PSW-401; Albany; CA; U;S; Department of Agriculture; Forest Service; Pacific Southwest Forest | |
| Larix Gmelinii Rupr. | Asia | |  | | Wang, C. (2006). "Biomass allometric equations for 10 co-occurring tree species in Chinese temperate forests." Forest Ecology and Management 222(1-3): 9-16 | |
| Carapa guianensis | North America | |  | | Segura, M; Kanninen, M. 2005. Allometric Models for Tree Volume and Total Aboveground Biomass in a Tropical Humid Forest in Costa Rica1. Biotropica 37(1):2-8. | |
| Leucaena leucocephala | North America | |  | | Dudley; N; Fownes; J; 1992; Preliminary biomass equations for eight species of fast-growing tropical trees; Journal of Tropical Forest Science; 5; 68-73; | |
| Ailanthus triphysa | Asia | |  | | Kumar, B.M., George, S.J., Jamaludheen, V. & Suresh, T.K. 1998. Comparison of biomass production , tree allometry and nutrient use efficiency of multipurpose trees grown in woodlot and silvopastoral experiments in Kerala , India. Forest Ecology and Management, 112: 145?163. | |
| Blakea granatensis | South America | |  | | Perez Lara, M; Diaz Timote, J. 2010. Estimacion del carbono contenido en la biomasa forestal aerea de dos bosques andinos en los departamentos de Santander y Cundinamarca. Ing. Forestal. CO., Universidad Distrital Francisco Jose de Caldas. 87 p. p. | |
| Abies Nephrolepis | Asia | |  | | Wang, J., Zhang, C., et al. (2011). "Biomass Structure and Allometry of Abies nephrolepis (Maxim) in Northeast China." Silva Fennica 45(2): 211-226 | |
| Hesperomeles goudotiana | South America | |  | | Perez Lara, M; Diaz Timote, J. 2010. Estimacion del carbono contenido en la biomasa forestal aerea de dos bosques andinos en los departamentos de Santander y Cundinamarca. Ing. Forestal. CO., Universidad Distrital Francisco Jose de Caldas. 87 p. p. | |
| Quercus rysophylla | North America | |  | | RodrÃ­guez, R., J. JÃ­menez, O. Aguirre y E. Jurado. 2007. Ecuaciones alomÃ©tricas para estimar biomasa aÃ©rea en especies de encino y pino en Iturbide,N.L. Ciencia Forestal en MÃ©xico 32(1): 39-56. | |
| Quercus spp | North America | |  | | Acosta, M., J. Vargas, A. VelÃ¡zquez y J. Etchevers. 2002. EstimaciÃ³n de la biomasa aÃ©rea mediante el uso de relaciones alomÃ©tricas en seis especies arbÃ³reas en Oaxaca, MÃ©xico. Agrociencia 36(6): 725-736. | |
| Liquidambar spp | North America | |  | | Acosta, M., J. Vargas, A. VelÃ¡zquez y J. Etchevers. 2002. EstimaciÃ³n de la biomasa aÃ©rea mediante el uso de relaciones alomÃ©tricas en seis especies arbÃ³reas en Oaxaca, MÃ©xico. Agrociencia 36(6): 725-736. | |
| Quercus spp | North America | |  | | NÃ¡var, J. 2010. AlometrÃ­a para biomasa en especies arbÃ³reas del noroeste de MÃ©xico. Tropical and Subtropical Agroecosystems (12): 507-519. | |
| Alnus acuminata subspp. glabrata | North America | |  | | Acosta, M., J. Vargas, A. VelÃ¡zquez y J. Etchevers. 2002. EstimaciÃ³n de la biomasa aÃ©rea mediante el uso de relaciones alomÃ©tricas en seis especies arbÃ³reas en Oaxaca, MÃ©xico. Agrociencia 36(6): 725-736. | |
| Inga spp | North America | |  | | Acosta, M., J. Vargas, A. VelÃ¡zquez y J. Etchevers. 2002. EstimaciÃ³n de la biomasa aÃ©rea mediante el uso de relaciones alomÃ©tricas en seis especies arbÃ³reas en Oaxaca, MÃ©xico. Agrociencia 36(6): 725-736. | |
| Quercus rysophylla | North America | |  | | RodrÃ­guez, R., J. JÃ­menez, O. Aguirre y E. Jurado. 2007. Ecuaciones alomÃ©tricas para estimar biomasa aÃ©rea en especies de encino y pino en Iturbide,N.L. Ciencia Forestal en MÃ©xico 32(1): 39-56. | |
| Quercus canbyi | North America | |  | | RodrÃ­guez, R., J. JÃ­menez, O. Aguirre y E. Jurado. 2007. Ecuaciones alomÃ©tricas para estimar biomasa aÃ©rea en especies de encino y pino en Iturbide,N.L. Ciencia Forestal en MÃ©xico 32(1): 39-56. | |
| General | Asia | |  | | Basuki, T. M., P. E. van Laake, A. K. Skidmore and Y. A. Hussin (2009). "Allometric equations for estimating the above-ground biomass in tropical lowland Dipterocarp forests." Forest Ecology and Management 257(8): 1684-1694 | |
| Populus tremuloides | North America | |  | | Pollard; D; 1972; Above-ground dry matter production in three stands of trembling aspen; Canadian Journal of Forest Research; 2; 27-33; | |
| Eucalyptus grandis | Asia | |  | | Krisnawati, H., W. C. Adinugroho and R. Imanuddin (2012). Monograph Allometric Models for Estimating Tree Biomass at Vrious Forest Ecosystem Types in Indonesia. Bogor, Indonesia, Research and Development Center for Conservation and Rehabilitation, Forestry Research and Development Agency, Ministry of Forestry. | |
| General | Africa | |  | | Chimudayo, E.N. 1990. Above-ground woody biomass structure and productivity in a Zambezian woodland. Forest Ecology and Management 36: 33-46. | |
| Shorea leprosula | Asia | |  | | Krisnawati, H., W. C. Adinugroho and R. Imanuddin (2012). Monograph Allometric Models for Estimating Tree Biomass at Vrious Forest Ecosystem Types in Indonesia. Bogor, Indonesia, Research and Development Center for Conservation and Rehabilitation, Forestry Research and Development Agency, Ministry of Forestry. | |
| Shorea leprosula | Asia | |  | | Krisnawati, H., W. C. Adinugroho and R. Imanuddin (2012). Monograph Allometric Models for Estimating Tree Biomass at Vrious Forest Ecosystem Types in Indonesia. Bogor, Indonesia, Research and Development Center for Conservation and Rehabilitation, Forestry Research and Development Agency, Ministry of Forestry. | |
| Terminalia ferdinandiana | Oceania | |  | | O'Grady, A. P., X. Chen, et al. (2000). "Composition, leaf area index and standing biomass of eucalypt open forests near Darwin in the Northern Territory, Australia." Australian Journal of Botany 48(5): 629-638 | |
| Abies religiosa | North America | |  | | AvendaÃ±o, D. 2006. DeterminaciÃ³n de ecuaciones alomÃ©tricas para estimar biomasa y carbono en Abies religiosa (H.B.K) Schl. et Cham., en Tlaxcala, MÃ©xico. Tesis Profesional. Universidad AutÃ³noma de Chapingo, MÃ©xico. 66 p. | |
| General | South America | |  | | Pereira Da Silva, R. 2007. Alometria, estoque e dinamica da biomassa de florestas primarias e secundarias na Regiao de Manaus (am). Manaus,, UFAM; INPA. 152 p. | |
| Coffea arabica | North America | |  | | Segura, M., M. Kanninen y D. SuÃ¡rez. 2006. Allometric models for estimating aboveground biomass of shade trees and coffee bushes grown together. Agroforest Syst 68:143-150. | |
| Coffea arabica | North America | |  | | Segura, M., M. Kanninen y D. SuÃ¡rez. 2006. Allometric models for estimating aboveground biomass of shade trees and coffee bushes grown together. Agroforest Syst 68:143-150. | |
| Picea rubens | North America | |  | | Siccama; T; G; Hamburg; S; P; Arthur; M; A; Yanai; R; D; Bormann; F; H; Likens; G; E; 1994; Corrections to allometric equations and plant tissue chemistry for Hubbard Brook Experimental Forest; Ecology; 75; 246-248; | |
| Fagus grandifolia | North America | |  | | Siccama; T; G; Hamburg; S; P; Arthur; M; A; Yanai; R; D; Bormann; F; H; Likens; G; E; 1994; Corrections to allometric equations and plant tissue chemistry for Hubbard Brook Experimental Forest; Ecology; 75; 246-248; | |
| Betula alleghaniensis | North America | |  | | Siccama; T; G; Hamburg; S; P; Arthur; M; A; Yanai; R; D; Bormann; F; H; Likens; G; E; 1994; Corrections to allometric equations and plant tissue chemistry for Hubbard Brook Experimental Forest; Ecology; 75; 246-248; | |
| Juglans olanchana | North America | |  | | Segura, M., M. Kanninen y D. SuÃ¡rez. 2006. Allometric models for estimating aboveground biomass of shade trees and coffee bushes grown together. Agroforest Syst 68:143-150. | |
| Abies balsamea | North America | |  | | MacLean; D; A; Wein; R; W; 1976; Biomass of jack pine and mixed hardwood stands in northeastern New Brunswick; Canadian Journal of Forest Research; 6; 441-447; | |
| Combretum geitonophyllum | Africa | |  | | Manlay, R.J., Kaire, M., Masse, D., Chotte, J.-L., Ciornei, G. and Floret, C. 2002. Carbon, nitrogen and phosphorus allocation in agro-ecosystems of a West African savanna I. The plant component under semi-permanent cultivation. Agriculture, Ecosystems and Environment 88: 215-232. | |
| Paraserianthes falcataria | Asia | |  | | Krisnawati, H., W. C. Adinugroho and R. Imanuddin (2012). Monograph Allometric Models for Estimating Tree Biomass at Vrious Forest Ecosystem Types in Indonesia. Bogor, Indonesia, Research and Development Center for Conservation and Rehabilitation, Forestry Research and Development Agency, Ministry of Forestry. | |
| Pseudotsuga menziesii | North America | |  | | Marshall; P; L; Wang; Y; 1995; Above ground tree biomass of interior uneven-aged Douglas-fir stands; Work; Pap; WP-1;5-003; Vancouver; BC; University of British Columbia; | |
| Picea glauca | North America | |  | | Harding; R; B; Grigal; D; F; 1985; Individual tree biomass estimation equations for plantationgrown white spruce in northern Minnesota; Canadian Journal of Forest Research; 15; 738-739; | |
| Abies balsamea | North America | |  | | Perala; D; A; Alban; D; H; 1994; Allometric biomass estimators for aspen-dominated ecosystems in the upper Great Lakes; Res; Pap; NC-314; St; Paul; MN; U;S; Department of Agriculture; Forest Service; North Central Forest Experiment Station; | |
| Acer saccharum | North America | |  | | Siccama; T; G; Hamburg; S; P; Arthur; M; A; Yanai; R; D; Bormann; F; H; Likens; G; E; 1994; Corrections to allometric equations and plant tissue chemistry for Hubbard Brook Experimental Forest; Ecology; 75; 246-248; | |
| Acacia mangium | South America | |  | | Giraldo, L; Zapata, M; Montoya, E. 2006. Estimacion de la captura y flujo de carbono en silvopastoreo de Acacia mangium asociada con Brachiaria dyctioneura en Colombia. Pastos y Forrajes 29(4):421-435. | |
| General | Asia | |  | | Krisnawati, H., W. C. Adinugroho and R. Imanuddin (2012). Monograph Allometric Models for Estimating Tree Biomass at Vrious Forest Ecosystem Types in Indonesia. Bogor, Indonesia, Research and Development Center for Conservation and Rehabilitation, Forestry Research and Development Agency, Ministry of Forestry. | |
| Acer grandidentatum | North America | |  | | Chojnacky; D; 1984; Volume and biomass for curlleaf cercocarpus in Nevada; Res; Pap; INT-332; Ogden; UT; U;S; Department of Agriculture; Forest Service; Intermountain Forest and Range Experiment Station; | |
| Clethra fimbriata | South America | |  | | Perez Lara, M; Diaz Timote, J. 2010. Estimacion del carbono contenido en la biomasa forestal aerea de dos bosques andinos en los departamentos de Santander y Cundinamarca. Ing. Forestal. CO., Universidad Distrital Francisco Jose de Caldas. 87 p. p. | |
| Acacia mangium | Asia | |  | | Krisnawati, H., W. C. Adinugroho and R. Imanuddin (2012). Monograph Allometric Models for Estimating Tree Biomass at Vrious Forest Ecosystem Types in Indonesia. Bogor, Indonesia, Research and Development Center for Conservation and Rehabilitation, Forestry Research and Development Agency, Ministry of Forestry. | |
| Leucaena leucocephala | Asia | |  | | Tandug, L. M. (1986). "Biomass prediction equations for giant ipil-ipil (Leucaena leucocephala (Lam.) de Wit)." Sylvatrop Philippine Forest Resources Journal 11(1 & 2): 1-22. | |
| Alfaroa colombiana | South America | |  | | Perez Lara, M; Diaz Timote, J. 2010. Estimacion del carbono contenido en la biomasa forestal aerea de dos bosques andinos en los departamentos de Santander y Cundinamarca. Ing. Forestal. CO., Universidad Distrital Francisco Jose de Caldas. 87 p. p. | |
| Vitex parviflora | Asia | |  | | Santos Martin, F., R. M. Navarro-Cerrillo, R. Mulia and M. Noordwijk (2010). "Allometric equations based on a fractal branching model for estimating aboveground biomass of four native tree species in the Philippines." Agroforestry Systems 78(3): 193-202. | |
| General | Asia | |  | | Banaticla, M. R. N., R. F. Sales and R. D. Lasco (2007). "Biomass equations for tropical tree plantation species using secondary data from the Philippines." Annals of Tropical Research 29(3): 73-90. | |
| Lansium anamallyanum | Asia | |  | | Rai, S.N. 1984. Bark,Branches,Leaves,Stump and Trunk in tropical rain forests of western ghats,India. Indian Forester, 110(8):754-764. | |
| Dimocarpus longana | Asia | |  | | Rai, S.N. 1984. Bark,Branches,Leaves,Stump and Trunk in tropical rain forests of western ghats,India. Indian Forester, 110(8):754-764. | |
| Garcinia indica | Asia | |  | | Rai, S.N. 1984. Bark,Branches,Leaves,Stump and Trunk in tropical rain forests of western ghats,India. Indian Forester, 110(8):754-764. | |
| Cinnamomum camphora | Asia | |  | | Zhang, G., Li, X., et al. (2012). "Biomass characteristics of dominent tree species (group) at Lingnan forest farm in Anhui Province." Scientia Silvae Sincae 48(5): 136-140 | |
| Pinus taeda | North America | |  | | Naidu; S; DeLucia; E; Thomas; R; 1998; Contrasting patterns of biomass allocation in dominant and suppressed loblolly pine; Canadian Journal of Forest Research; 28; 1116-1124; | |
| Picea glauca | North America | |  | | Freedman; B; 1984; The relationship between the aboveground dry weight and diameter for a wide size range of erect land plants; Canadian Journal of Botany; 62; 2370-2374; | |
| Abies balsamea | North America | |  | | Ker, M. 1980, Tree biomass equations for seven species in southwestern New Brunswick, Inf. Rep. No. M-X-114, Fredericton, NS, Canadian Forestry Service, Maritime Forest Research Center | |
| Eucalyptus grandis | North America | |  | | Schubert; T; Strand; R; Cole; T; McDuffie; K; 1988; Equations for predicting biomass of six introduced subtropical tree species; Island of Hawaii; Res; Note PSW-401; Albany; CA; U;S; Department of Agriculture; Forest Service; Pacific Southwest Forest | |
| Acacia mangium | North America | |  | | Dudley; N; Fownes; J; 1992; Preliminary biomass equations for eight species of fast-growing tropical trees; Journal of Tropical Forest Science; 5; 68-73; | |
| Quercus polymorpha | North America | |  | | DomÃ­nguez, G. 2005. EvaluaciÃ³n del contenido de carbono en bosques del sur de Nuevo LeÃ³n. Tesis de MaestrÃ­a. Universidad AutÃ³noma de Nuevo LeÃ³n. MÃ©xico. 63 p. | |
| Alnus spp | North America | |  | | Helgerson; O; Cromack; K; Stafford; S; Miller; R; Slagle; R; 1988; Equations for estimating aboveground components of young Douglas-fir and red alder in a coastal Oregon plantation; Canadian Journal of Forest Research; 18; 1082-1085; | |
| Eucalyptus globulus | Africa | |  | | Hailu, Z. 2002. Ecological impact evaluation of Eucalyptus plantations in comparison with agricultural and grazing land-use types in the Highlands of Ethiopia. Vienna University of Agricultural Sciences, Vienna. | |
| Trichospermum mexicanum | North America | |  | | Douterlungne, D. 2013. Ãrboles de rÃ¡pido crecimiento para la restauraciÃ³n ecolÃ³gica y la captura de carbono en el trÃ³pico hÃºmedo de MÃ©xico. Tesis de Doctorado. El Colegio de la Frontera Sur. MÃ©xico. 83 p. | |
| Pinus spp | North America | |  | | NÃ¡var, J. 2010. AlometrÃ­a para biomasa en especies arbÃ³reas del noroeste de MÃ©xico. Tropical and Subtropical Agroecosystems (12): 507-519. | |
| Quercus spp | North America | |  | | NÃ¡var, J. 2010. AlometrÃ­a para biomasa en especies arbÃ³reas del noroeste de MÃ©xico. Tropical and Subtropical Agroecosystems (12): 507-519. | |
| Pinus Massoniana | Asia | |  | | Xiang, W., S. Liu, et al. (2011). "General allometric equations and biomass allocation of Pinus massoniana trees on a regional scale in southern China." Ecological Research 26(4): 697-711 | |
| Pinus Massoniana | Asia | |  | | Xiang, W., S. Liu, et al. (2011). "General allometric equations and biomass allocation of Pinus massoniana trees on a regional scale in southern China." Ecological Research 26(4): 697-711 | |
| Pometia spp | Asia | |  | | Krisnawati, H., W. C. Adinugroho and R. Imanuddin (2012). Monograph Allometric Models for Estimating Tree Biomass at Vrious Forest Ecosystem Types in Indonesia. Bogor, Indonesia, Research and Development Center for Conservation and Rehabilitation, Forestry Research and Development Agency, Ministry of Forestry. | |
| Clethra fimbriata | South America | |  | | Perez Lara, M; Diaz Timote, J. 2010. Estimacion del carbono contenido en la biomasa forestal aerea de dos bosques andinos en los departamentos de Santander y Cundinamarca. Ing. Forestal. CO., Universidad Distrital Francisco Jose de Caldas. 87 p. p. | |
| Cordia alliodora | South America | |  | | Rojas-GarcÃ­a, F., P. MartÃ­nez-Zurimendi, M. OlguÃ­n y B. De Jong. 2009. Ecuaciones alomÃ©tricas para estimar biomasa aÃ©rea en MÃ©xico. ECOSUR-CONAFOR. InÃ©dito. | |
| Sassafras albidum | North America | |  | | Williams, R. A.; McClenahen, J. R. 1984. Biomass prediction equations for seedlings, sprouts, and saplings of ten central hardwood species. Forest Science. 30: 523-527. | |
| Populus tremuloides | North America | |  | | Pollard; D; 1972; Above-ground dry matter production in three stands of trembling aspen; Canadian Journal of Forest Research; 2; 27-33; | |
| Acer saccharum | North America | |  | | Pastor; J; Bockheim; J; 1981; Biomass and production of an aspen-mixed hardwood-spodosol ecosystem in northern Wisconsin; Canadian Journal of Forest Research; 11; 132-138; | |
| Alfaroa colombiana | South America | |  | | Perez Lara, M; Diaz Timote, J. 2010. Estimacion del carbono contenido en la biomasa forestal aerea de dos bosques andinos en los departamentos de Santander y Cundinamarca. Ing. Forestal. CO., Universidad Distrital Francisco Jose de Caldas. 87 p. p. | |
| Eucalyptus annulata | Oceania | |  | | Jonson, J. H. and D. Freudenberger (2011). "Restore and sequester: Estimating biomass in native Australian woodland ecosystems for their carbon-funded restoration." Australian Journal of Botany 59(7): 639-652 | |
| Rhizophora apiculata | Asia | |  | | Krisnawati, H., W. C. Adinugroho and R. Imanuddin (2012). Monograph Allometric Models for Estimating Tree Biomass at Vrious Forest Ecosystem Types in Indonesia. Bogor, Indonesia, Research and Development Center for Conservation and Rehabilitation, Forestry Research and Development Agency, Ministry of Forestry. | |
| Vatairea paraensis | South America | |  | | Overman, JPM; Witte, HJL; Saldarriaga, JG. 1994. Evaluation of regression models for above-ground biomass determination in Amazon Rainforest. Journal of Tropical Ecology 10(2). | |
| Quercus prinus | North America | |  | | Martin; J; Kloeppel; B; Schaefer; T; Kimbler; D; McNulty; S; 1998; Aboveground biomass and nitrogen allocation of ten deciduous southern Appalachian tree species; Canadian Journal of Forest Research; 28; 1648-1659; | |
| Picea mariana | North America | |  | | Ouellet; D; 1983; Biomass equations for black spruce in Quebec; Inf; Rep; LAU-X-60E; Canadian Forestry Service; Laurentian Forest Research Centre; | |
| Populus tremuloides | North America | |  | | Ker, M. 1980, Tree biomass equation for ten major species in Cumberland County, Nova Scotia. Inf. Rep. M-X-108; Fredericton, NS, Canadian Forestry Service, Maritime Forest Research Center | |
| Pinus banksiana | North America | |  | | Green; D; Grigal; D; 1978; Generalized biomass estimation equations for jack pine; Res; Note 268; St; Paul; MN; University of Minnesota; College of Forestry; | |
| Picea glauca | North America | |  | | Ker, M. 1980, Tree biomass equation for ten major species in Cumberland County, Nova Scotia. Inf. Rep. M-X-108; Fredericton, NS, Canadian Forestry Service, Maritime Forest Research Center | |
| Eucalyptus sargentii | Oceania | |  | | Paul, K. I., S. H. Roxburgh, et al. (2013). "Development and testing of allometric equations for estimating above-ground biomass of mixed-species environmental plantings." Forest Ecology and Management 310(0): 483-494. | |
| Angophora costata | Oceania | |  | | Bi, H., J. Turner, et al. (2004). "Additive biomass equations for native eucalypt forest trees of temperate Australia." Trees 18(4): 467-479 | |
| Acacia mangium | South America | |  | | Giraldo, L; Zapata, M; Montoya, E. 2006. Estimacion de la captura y flujo de carbono en silvopastoreo de Acacia mangium asociada con Brachiaria dyctioneura en Colombia. Pastos y Forrajes 29(4):421-435. | |
| Paraserianthes falcataria | Asia | |  | | Krisnawati, H., W. C. Adinugroho and R. Imanuddin (2012). Monograph Allometric Models for Estimating Tree Biomass at Vrious Forest Ecosystem Types in Indonesia. Bogor, Indonesia, Research and Development Center for Conservation and Rehabilitation, Forestry Research and Development Agency, Ministry of Forestry. | |
| Pinus ayacahuite | North America | |  | | NÃ¡var, J. 2009. Allometric equations for tree species and carbon stocks for forests of northwestern Mexico.Forest Ecology and Management 257:427-434 | |
| Pinus pseudostrobus | North America | |  | | Palma, A. 2011. EstimaciÃ³n de biomasa y carbono de Pinus pseudostrobus en San JosÃ© del RincÃ³n, Estado de MÃ©xico. Tesis Profesional. Universidad Nacional AutÃ³noma de MÃ©xico. MÃ©xico. 58 p. | |
| Pinus arizonica | North America | |  | | NÃ¡var, J. 2010. AlometrÃ­a para biomasa en especies arbÃ³reas del noroeste de MÃ©xico. Tropical and Subtropical Agroecosystems (12): 507-519. | |
| Pinus leiophylla | North America | |  | | NÃ¡var, J. 2010. AlometrÃ­a para biomasa en especies arbÃ³reas del noroeste de MÃ©xico. Tropical and Subtropical Agroecosystems (12): 507-519. | |
| Pinus arizonica var. ornelasii | North America | |  | | NÃ¡var, J. 2010. AlometrÃ­a para biomasa en especies arbÃ³reas del noroeste de MÃ©xico. Tropical and Subtropical Agroecosystems (12): 507-519. | |
| Quercus magnoliifolia | North America | |  | | GÃ³mez, J. 2008. DeterminaciÃ³n de los almacenes de carbono en los compartimentos aÃ¨reo y subterrÃ neo de dos tios de vegetaciÃ³n en la reserva de la bÃ³sfera"Sierra de Huatla", Morelos, MÃ©xico. Tesis Doctoral . Colegio de Postgraduados. MÃ©xico. 194p. | |
| Pinus durangensis | North America | |  | | NÃ¡var, J. 2010. AlometrÃ­a para biomasa en especies arbÃ³reas del noroeste de MÃ©xico. Tropical and Subtropical Agroecosystems (12): 507-519. | |
| Pinus durangensis | North America | |  | | NÃ¡var, J. 2010. AlometrÃ­a para biomasa en especies arbÃ³reas del noroeste de MÃ©xico. Tropical and Subtropical Agroecosystems (12): 507-519. | |
| Ipomoea arborescens | North America | |  | | GÃ³mez, J. 2008. DeterminaciÃ³n de los almacenes de carbono en los compartimentos aÃ¨reo y subterrÃ neo de dos tios de vegetaciÃ³n en la reserva de la bÃ³sfera"Sierra de Huatla", Morelos, MÃ©xico. Tesis Doctoral . Colegio de Postgraduados. MÃ©xico. 194p. | |
| Clethra fimbriata | South America | |  | | Perez Lara, M; Diaz Timote, J. 2010. Estimacion del carbono contenido en la biomasa forestal aerea de dos bosques andinos en los departamentos de Santander y Cundinamarca. Ing. Forestal. CO., Universidad Distrital Francisco Jose de Caldas. 87 p. p. | |
| Vallea stipularis | South America | |  | | Perez Lara, M; Diaz Timote, J. 2010. Estimacion del carbono contenido en la biomasa forestal aerea de dos bosques andinos en los departamentos de Santander y Cundinamarca. Ing. Forestal. CO., Universidad Distrital Francisco Jose de Caldas. 87 p. p. | |
| Quercus laeta | North America | |  | | Aguilar, R., A. Ghilardi, E. Vega, M. Skutsch y K. Oyama. 2012. Sprouting productivity and allometric relationships of two oak species managed for traditional charcoal making in central Mexico. Biomass and Bioenergy 36: 192-207. | |
| Eucalyptus tereticornis | Asia | |  | | Toky,O.P.,Riddell-Black,D.,Harris,P.J.C.,Vasudevan,P. & Davies, P.A. 2011. Biomass production in short rotation effluent-irrigated plantations in North-West India. Journal of Scientific & Industrial Research, 70: 601?609. | |
| Picea mariana | North America | |  | | Freedman; B; 1984; The relationship between the aboveground dry weight and diameter for a wide size range of erect land plants; Canadian Journal of Botany; 62; 2370-2374; | |
| Cornus florida | North America | |  | | Martin; J; Kloeppel; B; Schaefer; T; Kimbler; D; McNulty; S; 1998; Aboveground biomass and nitrogen allocation of ten deciduous southern Appalachian tree species; Canadian Journal of Forest Research; 28; 1648-1659; | |
| Acacia fleckii | Africa | |  | | de Klerk, J.N. 2002. Bush encroachment in Namibia. Report on Phase 1 of the Bush Encroachment Research. Monitoring and Management Project, Ministry of Environment and Tourism. | |
| Casuarina equisetifolia | North America | |  | | Dudley; N; Fownes; J; 1992; Preliminary biomass equations for eight species of fast-growing tropical trees; Journal of Tropical Forest Science; 5; 68-73; | |
| General | Asia | |  | | Krisnawati, H., W. C. Adinugroho and R. Imanuddin (2012). Monograph Allometric Models for Estimating Tree Biomass at Vrious Forest Ecosystem Types in Indonesia. Bogor, Indonesia, Research and Development Center for Conservation and Rehabilitation, Forestry Research and Development Agency, Ministry of Forestry. | |
| Scorodophloeus zenkeri | Africa | |  | | Kahindo T M., Dimandja L. J. P., Picard N. 2010. Volume equations and biomass estimates for three species in tropical moist forest in the Orientale province, Democratic Republic of Congo.Southern Forests.72:141-146 | |
| Cavendishia cordifolia | South America | |  | | Perez Lara, M; Diaz Timote, J. 2010. Estimacion del carbono contenido en la biomasa forestal aerea de dos bosques andinos en los departamentos de Santander y Cundinamarca. Ing. Forestal. CO., Universidad Distrital Francisco Jose de Caldas. 87 p. p. | |
| Pinus resinosa | North America | |  | | Ker, M. 1980, Tree biomass equations for seven species in southwestern New Brunswick, Inf. Rep. No. M-X-114, Fredericton, NS, Canadian Forestry Service, Maritime Forest Research Center | |
| Eucalyptus saligna | North America | |  | | Dudley; N; Fownes; J; 1992; Preliminary biomass equations for eight species of fast-growing tropical trees; Journal of Tropical Forest Science; 5; 68-73; | |
| Eucalyptus mannifera | Oceania | |  | | Paul, K. I., S. H. Roxburgh, et al. (2013). "Development and testing of allometric equations for estimating above-ground biomass of mixed-species environmental plantings." Forest Ecology and Management 310(0): 483-494. | |
| General | Asia | |  | | Krisnawati, H., W. C. Adinugroho and R. Imanuddin (2012). Monograph Allometric Models for Estimating Tree Biomass at Vrious Forest Ecosystem Types in Indonesia. Bogor, Indonesia, Research and Development Center for Conservation and Rehabilitation, Forestry Research and Development Agency, Ministry of Forestry. | |
| Carapa guianensis | North America | |  | | Segura, M; Kanninen, M. 2005. Allometric Models for Tree Volume and Total Aboveground Biomass in a Tropical Humid Forest in Costa Rica1. Biotropica 37(1):2-8. | |
| Macleania rupestris | South America | |  | | Perez Lara, M; Diaz Timote, J. 2010. Estimacion del carbono contenido en la biomasa forestal aerea de dos bosques andinos en los departamentos de Santander y Cundinamarca. Ing. Forestal. CO., Universidad Distrital Francisco Jose de Caldas. 87 p. p. | |
| Macleania rupestris | South America | |  | | Perez Lara, M; Diaz Timote, J. 2010. Estimacion del carbono contenido en la biomasa forestal aerea de dos bosques andinos en los departamentos de Santander y Cundinamarca. Ing. Forestal. CO., Universidad Distrital Francisco Jose de Caldas. 87 p. p. | |
| Cinnamomum camphora | Asia | |  | | Zhang, G., Li, X., et al. (2012). "Biomass characteristics of dominent tree species (group) at Lingnan forest farm in Anhui Province." Scientia Silvae Sincae 48(5): 136-140 | |
| Quercus hypoleucoides | North America | |  | | Whittaker, R. H.; Niering, W. A. 1975. Vegetation of the Santa Catalina Mountains, Arizona. V. Biomass, production, and diversity along the elevation gradient. Ecology. 56: 771-790. | |
| Picea abies | Europe | |  | | Briggs, E.F. and Cunia, T. 1982. Effect of cluster sampling in biomass tables construction: linear regression models. Canadian Journal of Forest Research (12) 255-263 | |
| Terminalia amazonia | North America | |  | | Montero, M. M. and Kanninen, M. 2005. Terminalia Amazonia: Ecologia Y Silvicultura. Catie, 32 pp | |
| Tilia Amurensis Rupr. | Asia | |  | | Wang, C. (2006). "Biomass allometric equations for 10 co-occurring tree species in Chinese temperate forests." Forest Ecology and Management 222(1-3): 9-16 | |
| Picea mariana | North America | |  | | Grigal; D; Kernik; L; 1978; Biomass estimation equations for black spruce (Picea mariana (Mill; (B;S;P;))) trees; Res; Note 290; St; Paul; MN; University of Minnesota; College of Forestry; | |
| Betula papyrifera | North America | |  | | Ker, M. 1980, Tree biomass equation for ten major species in Cumberland County, Nova Scotia. Inf. Rep. M-X-108; Fredericton, NS, Canadian Forestry Service, Maritime Forest Research Center | |
| Picea rubens | North America | |  | | Ker, M. 1980, Tree biomass equation for ten major species in Cumberland County, Nova Scotia. Inf. Rep. M-X-108; Fredericton, NS, Canadian Forestry Service, Maritime Forest Research Center | |
| Quercus macrocarpa | North America | |  | | Perala; D; A; Alban; D; H; 1994; Allometric biomass estimators for aspen-dominated ecosystems in the upper Great Lakes; Res; Pap; NC-314; St; Paul; MN; U;S; Department of Agriculture; Forest Service; North Central Forest Experiment Station; | |
| Schima wallichii | Asia | |  | | Krisnawati, H., W. C. Adinugroho and R. Imanuddin (2012). Monograph Allometric Models for Estimating Tree Biomass at Vrious Forest Ecosystem Types in Indonesia. Bogor, Indonesia, Research and Development Center for Conservation and Rehabilitation, Forestry Research and Development Agency, Ministry of Forestry. | |
| Quercus germana | North America | |  | | RodrÃ­guez R., J. JimÃ©nez, O. Aguirre, E. TreviÃ±o y R. Razo. 2009. EstimaciÃ³n de carbono almacenado en el bosque de pino-encino en la Reserva de la Biosfera el Cielo, Tamaulipas, MÃ©xico. Ra Ximhai 5 (3): 317-327. | |
| Rhizophora mucronata | Asia | |  | | Krisnawati, H., W. C. Adinugroho and R. Imanuddin (2012). Monograph Allometric Models for Estimating Tree Biomass at Vrious Forest Ecosystem Types in Indonesia. Bogor, Indonesia, Research and Development Center for Conservation and Rehabilitation, Forestry Research and Development Agency, Ministry of Forestry. | |
| General | North America | |  | | Schlamadinger, B., K. Boonpragob, H. Janzen, W. Kurz, R. Lasco y P. Smith. 2003. MÃ©todos complementarios y orientaciÃ³n sobre las buenas prÃ¡cticas que emanan del Protocolo de Kyoto. Capitulo 4. Intergovernmental Panel on Climate Change. Cambridge University Press, Cambridge, Reino Unido. 132 p. | |
| Acacia implexa | Oceania | |  | | Paul, K. I., S. H. Roxburgh, et al. (2013). "Development and testing of allometric equations for estimating above-ground biomass of mixed-species environmental plantings." Forest Ecology and Management 310(0): 483-494. | |
| Leucaena leucocephala | Asia | |  | | Tandug, L. M. (1986). "Biomass prediction equations for giant ipil-ipil (Leucaena leucocephala (Lam.) de Wit)." Sylvatrop Philippine Forest Resources Journal 11(1 & 2): 1-22. | |
| Pinus spp | North America | |  | | Ayala, R., B. De Jong y H. RamÃ­rez. 2001. Ecuaciones para estimar biomasa de pinos y encinos en la meseta central de Chiapas. Revista Chapingo Serie Ciencias Forestales y del Ambiente 7(2): 153-157. | |
| Cochlospermum vitifolium | North America | |  | | NÃ¡var, J. 2009. Allometric equations and expansion factors for tropical dry forest trees of eastern Sinaloa, Mexico. Tropical and Subtropical Agroecosystems 10: 45 â€“ 52. | |
| Pinus arizonica | North America | |  | | NÃ¡var, J. 2009. Allometric equations for tree species and carbon stocks for forests of northwestern Mexico.Forest Ecology and Management 257:427-434 | |
| Quercus coccinea | North America | |  | | Martin; J; Kloeppel; B; Schaefer; T; Kimbler; D; McNulty; S; 1998; Aboveground biomass and nitrogen allocation of ten deciduous southern Appalachian tree species; Canadian Journal of Forest Research; 28; 1648-1659; | |
| Eucalyptus miniata | Oceania | |  | | O'Grady, A. P., X. Chen, et al. (2000). "Composition, leaf area index and standing biomass of eucalypt open forests near Darwin in the Northern Territory, Australia." Australian Journal of Botany 48(5): 629-638 | |
| Fagus sylvatica | Europe | |  | | Bartelink, H.H. 1997. Allometric relationship for biomass and leaf area of beech (Fagus sylvatica L). Annals of Forest Science (54) 39-50 | |
| Fraxinus americana | North America | |  | | Williams, R. A.; McClenahen, J. R. 1984. Biomass prediction equations for seedlings, sprouts, and saplings of ten central hardwood species. Forest Science. 30: 523-527. | |
| Acacia mangium | Asia | |  | | Krisnawati, H., W. C. Adinugroho and R. Imanuddin (2012). Monograph Allometric Models for Estimating Tree Biomass at Vrious Forest Ecosystem Types in Indonesia. Bogor, Indonesia, Research and Development Center for Conservation and Rehabilitation, Forestry Research and Development Agency, Ministry of Forestry. | |
| Dalbergia sissoo | Asia | |  | | Lodhiyal, N.& and Lodhiyal, L.S. 2003. Biomass and net primary productivity of Bhabar Shisham forests in central Himalaya, India. Forest Ecology and Management, 176(1-3): 217?235. | |
| Acacia erubescens | Africa | |  | | de Klerk, J.N. 2002. Bush encroachment in Namibia. Report on Phase 1 of the Bush Encroachment Research. Monitoring and Management Project, Ministry of Environment and Tourism. | |
| Hesperomeles goudotiana | South America | |  | | Perez Lara, M; Diaz Timote, J. 2010. Estimacion del carbono contenido en la biomasa forestal aerea de dos bosques andinos en los departamentos de Santander y Cundinamarca. Ing. Forestal. CO., Universidad Distrital Francisco Jose de Caldas. 87 p. p. | |
| Sterigmapetalum tachirensis | South America | |  | | Perez Lara, M; Diaz Timote, J. 2010. Estimacion del carbono contenido en la biomasa forestal aerea de dos bosques andinos en los departamentos de Santander y Cundinamarca. Ing. Forestal. CO., Universidad Distrital Francisco Jose de Caldas. 87 p. p. | |
| Clusia cruciata | South America | |  | | Perez Lara, M; Diaz Timote, J. 2010. Estimacion del carbono contenido en la biomasa forestal aerea de dos bosques andinos en los departamentos de Santander y Cundinamarca. Ing. Forestal. CO., Universidad Distrital Francisco Jose de Caldas. 87 p. p. | |
| General | Asia | |  | | Krisnawati, H., W. C. Adinugroho and R. Imanuddin (2012). Monograph Allometric Models for Estimating Tree Biomass at Vrious Forest Ecosystem Types in Indonesia. Bogor, Indonesia, Research and Development Center for Conservation and Rehabilitation, Forestry Research and Development Agency, Ministry of Forestry. | |
| Leucaena leucocephala | Asia | |  | | Tandug, L. M. (1986). "Biomass prediction equations for giant ipil-ipil (Leucaena leucocephala (Lam.) de Wit)." Sylvatrop Philippine Forest Resources Journal 11(1 & 2): 1-22. | |
| Picea glauca | North America | |  | | Ker, M. 1980, Tree biomass equations for seven species in southwestern New Brunswick, Inf. Rep. No. M-X-114, Fredericton, NS, Canadian Forestry Service, Maritime Forest Research Center | |
| Bruguiera gymnorrhiza | Asia | |  | | Krisnawati, H., W. C. Adinugroho and R. Imanuddin (2012). Monograph Allometric Models for Estimating Tree Biomass at Vrious Forest Ecosystem Types in Indonesia. Bogor, Indonesia, Research and Development Center for Conservation and Rehabilitation, Forestry Research and Development Agency, Ministry of Forestry. | |
| Pinus sylvestris | Europe | |  | | Briggs, E.F. and Cunia, T. 1982. Effect of cluster sampling in biomass tables construction: linear regression models. Canadian Journal of Forest Research (12) 255-263 | |
| Billia rosea | South America | |  | | Perez Lara, M; Diaz Timote, J. 2010. Estimacion del carbono contenido en la biomasa forestal aerea de dos bosques andinos en los departamentos de Santander y Cundinamarca. Ing. Forestal. CO., Universidad Distrital Francisco Jose de Caldas. 87 p. p. | |
| Eucalyptus horistes | Oceania | |  | | Paul, K. I., S. H. Roxburgh, et al. (2013). "Development and testing of allometric equations for estimating above-ground biomass of mixed-species environmental plantings." Forest Ecology and Management 310(0): 483-494. | |
| Billia rosea | South America | |  | | Perez Lara, M; Diaz Timote, J. 2010. Estimacion del carbono contenido en la biomasa forestal aerea de dos bosques andinos en los departamentos de Santander y Cundinamarca. Ing. Forestal. CO., Universidad Distrital Francisco Jose de Caldas. 87 p. p. | |
| Aglaia korthalsii | Asia | |  | | Phuong, V.T., Xuan, N.X., Trieu, D.T., D., Trung, P.D., Giap, N.X., Thanh, P.N. (2012) Tree allometric equation development for estimation of forest above-ground biomass in Viet Nam -- Evergreen broadleaf, Deciduous, and Bamboo forests in the Central Highland region in (Eds) Inoguchi, A., Henry, M. Birigazzi, L. Sola, G. Tree allometric equation development for estimation of forest above-ground biomass in Viet Nam, UN-REDD Programme, Hanoi, Viet Nam | |
| Eucalyptus annulata | Oceania | |  | | Jonson, J. H. and D. Freudenberger (2011). "Restore and sequester: Estimating biomass in native Australian woodland ecosystems for their carbon-funded restoration." Australian Journal of Botany 59(7): 639-652 | |
| Swietenia macrophylla | Asia | |  | | Banaticla, M. R. N., R. F. Sales and R. D. Lasco (2007). "Biomass equations for tropical tree plantation species using secondary data from the Philippines." Annals of Tropical Research 29(3): 73-90. | |
| Gilbertiodendron dewevrei | Africa | |  | | Kahindo T M., Dimandja L. J. P., Picard N. 2010. Volume equations and biomass estimates for three species in tropical moist forest in the Orientale province, Democratic Republic of Congo.Southern Forests.72:141-146 | |
| Pinus patula | North America | |  | | RodrÃ­guez R., J. JimÃ©nez, O. Aguirre, E. TreviÃ±o y R. Razo. 2009. EstimaciÃ³n de carbono almacenado en el bosque de pino-encino en la Reserva de la Biosfera el Cielo, Tamaulipas, MÃ©xico. Ra Ximhai 5 (3): 317-327. | |
| Acer saccharum | North America | |  | | Bickelhaupt; D; Leaf; A; Richards; N; 1973; Effect of branching habit on above-ground dry weight estimates of Acer saccharum stands; In; Young; H; ed; IUFRO biomass studies; Nancy; France and Vancouver; BC; Orono; ME; University of Maine; College of L | |
| Pinus pseudostrobus | North America | |  | | MÃ©ndez, J., L. Luckie, M. CapÃ³ y J. NÃ¡jera. 2011. Ecuaciones alomÃ©tricas y estimaciÃ³n de incrementos en biomasa aÃ©rea y carbono en una plantaciÃ³n mixta de Pinus devoniana Lindl. y P. pseudostrobus Lindl., en Guanajuato, MÃ©xico. Agrociencia 45: 479-491. | |
| Weinmannia tomentosa | South America | |  | | Perez Lara, M; Diaz Timote, J. 2010. Estimacion del carbono contenido en la biomasa forestal aerea de dos bosques andinos en los departamentos de Santander y Cundinamarca. Ing. Forestal. CO., Universidad Distrital Francisco Jose de Caldas. 87 p. p. | |
| Weinmannia tomentosa | South America | |  | | Perez Lara, M; Diaz Timote, J. 2010. Estimacion del carbono contenido en la biomasa forestal aerea de dos bosques andinos en los departamentos de Santander y Cundinamarca. Ing. Forestal. CO., Universidad Distrital Francisco Jose de Caldas. 87 p. p. | |
| Cavendishia cordifolia | South America | |  | | Perez Lara, M; Diaz Timote, J. 2010. Estimacion del carbono contenido en la biomasa forestal aerea de dos bosques andinos en los departamentos de Santander y Cundinamarca. Ing. Forestal. CO., Universidad Distrital Francisco Jose de Caldas. 87 p. p. | |
| Fraxinus Mandshurica Rupr. | Asia | |  | | Wang, C. (2006). "Biomass allometric equations for 10 co-occurring tree species in Chinese temperate forests." Forest Ecology and Management 222(1-3): 9-16 | |
| Phellodendron Amurense Rupr. | Asia | |  | | Wang, C. (2006). "Biomass allometric equations for 10 co-occurring tree species in Chinese temperate forests." Forest Ecology and Management 222(1-3): 9-16 | |
| Terminalia amazonia | North America | |  | | Arreaga Gramajo, W. 2002. Almacenamiento del carbono en bosques con manejo forestal sostenible en la Reserva de Biosfera Maya, Peten, Guatemala. Tesis Mag. Sc. Turrialba, CR., CATIE. 86 p. p. | |
| Piliostigma thonningii | Africa | |  | | Manlay, R.J., Kaire, M., Masse, D., Chotte, J.-L., Ciornei, G. and Floret, C. 2002. Carbon, nitrogen and phosphorus allocation in agro-ecosystems of a West African savanna I. The plant component under semi-permanent cultivation. Agriculture, Ecosystems and Environment 88: 215-232. | |
| Jatropha mollissima | South America | |  | | Sampaio, EVSB; Silva, GC. 2005. Biomass equations for Brazilian semiarid caatinga plants. Acta Botanica Brasilica 19(4):935-943. | |
| Liquidambar spp | North America | |  | | Acosta, M., J. Vargas, A. VelÃ¡zquez y J. Etchevers. 2002. EstimaciÃ³n de la biomasa aÃ©rea mediante el uso de relaciones alomÃ©tricas en seis especies arbÃ³reas en Oaxaca, MÃ©xico. Agrociencia 36(6): 725-736. | |
| Pinus engelmannii | North America | |  | | NÃ¡var, J. 2009. Allometric equations for tree species and carbon stocks for forests of northwestern Mexico.Forest Ecology and Management 257:427-434 | |
| Leucaena leucocephala | Asia | |  | | Tandug, L. M. (1986). "Biomass prediction equations for giant ipil-ipil (Leucaena leucocephala (Lam.) de Wit)." Sylvatrop Philippine Forest Resources Journal 11(1 & 2): 1-22. | |
| Pinus durangensis | North America | |  | | NÃ¡var, J. 2009. Allometric equations for tree species and carbon stocks for forests of northwestern Mexico.Forest Ecology and Management 257:427-434 | |
| Rhizophora mangle | North America | |  | | Smith, T. y K. Whelan. 2006. Development of allometric relations for three mangrove species in South Florida for use in the Greater Everglades Ecosystem restoration. Wetlands Ecology and Management 14:409-419. | |
| Inga punctata | North America | |  | | Segura, M., M. Kanninen y D. SuÃ¡rez. 2006. Allometric models for estimating aboveground biomass of shade trees and coffee bushes grown together. Agroforest Syst 68:143-150. | |
| Rhizophora mangle | North America | |  | | Smith, T. y K. Whelan. 2006. Development of allometric relations for three mangrove species in South Florida for use in the Greater Everglades Ecosystem restoration. Wetlands Ecology and Management 14:409-419. | |
| Eucalyptus tri-sideroxylon | Oceania | |  | | Paul, K. I., S. H. Roxburgh, et al. (2013). "Development and testing of allometric equations for estimating above-ground biomass of mixed-species environmental plantings." Forest Ecology and Management 310(0): 483-494. | |
| Picea mariana | North America | |  | | Moore; T; R; Verspoor; E; 1973; Aboveground biomass of black spruce stands in subarctic Quebec; Canadian Journal of Forest Research; 3; 596-598; | |
| Tectona grandis | Asia | |  | | Buvaneswaran, C., George, M., Perez, D.& Kanninen, M.2006. Notes Biomass of Teak plantations in Tamilogadu , India and Costa Rica compared. Journal of Tropical Forest Science, 18(3): 195?197. | |
| Eucalyptus melanophloia | Oceania | |  | | Paul, K. I., S. H. Roxburgh, et al. (2013). "Development and testing of allometric equations for estimating above-ground biomass of mixed-species environmental plantings." Forest Ecology and Management 310(0): 483-494. | |
| Jatropha mollissima | South America | |  | | Sampaio, EVSB; Silva, GC. 2005. Biomass equations for Brazilian semiarid caatinga plants. Acta Botanica Brasilica 19(4):935-943. | |
| Calophyllum brasiliense | South America | |  | | Montero, M. M. and Montagnini, F. 2004. Modelos Alometricos Para La Estimacion De Biomasa De Diez Especies Nativas En Plantaciones En La Region Atlantica De Costa Rica. Recursos Naturales y Ambiente,(45): 112-119. | |
| Quercus alba | North America | |  | | Whittaker, R. H.; Woodwell, G. M. 1968. Dimension and production relations of trees and shrubs in the Brookhaven Forest, New York. Journal of Ecology. 56: 1-25. | |
| Betula alleghaniensis | North America | |  | | Freedman; B; 1984; The relationship between the aboveground dry weight and diameter for a wide size range of erect land plants; Canadian Journal of Botany; 62; 2370-2374; | |
| General | South America | |  | | Perez Lara, M; Diaz Timote, J. 2010. Estimacion del carbono contenido en la biomasa forestal aerea de dos bosques andinos en los departamentos de Santander y Cundinamarca. Ing. Forestal. CO., Universidad Distrital Francisco Jose de Caldas. 87 p. p. | |
| Eucalyptus camaldulensis | Asia | |  | | Mishra, H.C., Chandra, S.& Khanduja, C.P. 1994. Menagement of Forest Plantation Resources of Central Tarai Forest DivisionUsing Remote Sensing and GIS.75pp . | |
| Pinus sylvestris | Europe | |  | | Makela, A. and Vanninen, P. 1998. Impacts of size and competition on tree form and distribution of aboveground biomass in Scots pine. Canadian Journal of Forest Research (28) 216-227 | |
| Vatairea paraensis | South America | |  | | Araujo, T; Higuchi, N; Carvalho, JdJ. 1999. Comparison of formulae for biomass content determination in a tropical rain forest site in the state of Para, Brazil. Forest Ecology and Management 117:43-52. | |
| General | South America | |  | | Beekman F., 1981. Structural and dynamic aspects of the occurrence and development of lianes in the tropical rain forest. Department of Forestry, Agricultural University, Wageningen, The Netherlands cited in: Navar. J. 2009. Biomass component equations for Latin American species and groups of species -Online material. Annual of Forest Sciences 66(208). | |
| Leucaena leucocephala | Asia | |  | | Singh, V. & Toky, O.P. 1995. Biomass Acacia and net primary productivity and Eucalyptus , (? energy ?) plantations in arid in Leucaena , high density India. Journal of Arid Environments, 31: 301?309. | |
| General | Asia | |  | | H., R. K. J., N. M. Majid, G. Seca and O. H. Ahmed (2011). "Total aboveground biomass of selected age stand of a rehabilitated forest." Rehabilitation of Tropical Rainforest Ecosystems. | |
| Bambusa vulgaris | Asia | |  | | Nath, A.J., Das, G. & Das, A.K. 2009. Above ground standing biomass and carbon storage in village bamboos in North East India. Biomass and Bioenergy, 33(9): 1188?1196. | |
| Acacia mangium | Oceania | |  | | Paul, K. I., S. H. Roxburgh, et al. (2013). "Development and testing of allometric equations for estimating above-ground biomass of mixed-species environmental plantings." Forest Ecology and Management 310(0): 483-494. | |
| General | Asia | |  | | H., R. K. J., N. M. Majid, G. Seca and O. H. Ahmed (2011). "Total aboveground biomass of selected age stand of a rehabilitated forest." Rehabilitation of Tropical Rainforest Ecosystems. | |
| Bambusa cacharensis | Asia | |  | | Nath, A.J., Das, G. & Das, A.K. 2009. Above ground standing biomass and carbon storage in village bamboos in North East India. Biomass and Bioenergy, 33(9): 1188?1196. | |
| General | North America | |  | | Schlamadinger, B., K. Boonpragob, H. Janzen, W. Kurz, R. Lasco y P. Smith. 2003. MÃ©todos complementarios y orientaciÃ³n sobre las buenas prÃ¡cticas que emanan del Protocolo de Kyoto. Capitulo 4. Intergovernmental Panel on Climate Change. Cambridge University Press, Cambridge, Reino Unido. 132 p. | |
| Pinus teocote | North America | |  | | DomÃ­nguez, G. 2005. EvaluaciÃ³n del contenido de carbono en bosques del sur de Nuevo LeÃ³n. Tesis de MaestrÃ­a. Universidad AutÃ³noma de Nuevo LeÃ³n. MÃ©xico. 63 p. | |
| Hardwickia binnata | Asia | |  | | Rai, A.P., Singh, U.P. & Jabeen, N. 2010. Statistical models for prediction of growth and yield of Dalbergia sisoo and Hardwickia binnata under silvipastoral system in India. Indian Journal of Forestry, 33(1): 13?20. | |
| Acacia acuminata | Oceania | |  | | Paul, K. I., S. H. Roxburgh, et al. (2013). "Development and testing of allometric equations for estimating above-ground biomass of mixed-species environmental plantings." Forest Ecology and Management 310(0): 483-494. | |
| Eucalyptus sppathulata | Oceania | |  | | Paul, K. I., S. H. Roxburgh, et al. (2013). "Development and testing of allometric equations for estimating above-ground biomass of mixed-species environmental plantings." Forest Ecology and Management 310(0): 483-494. | |
| Eucalyptus pilularis | Oceania | |  | | Bi, H., J. Turner, et al. (2004). "Additive biomass equations for native eucalypt forest trees of temperate Australia." Trees 18(4): 467-479 | |
| General | Africa | |  | | Djomo A. N., Knohl A., Gravenhorst G., 2010. Estimation of forest biomass, carbon pools distribution and net primary prooduction of a moist tropical forest. | |
| Pinus merkusii | Asia | |  | | Krisnawati, H., W. C. Adinugroho and R. Imanuddin (2012). Monograph Allometric Models for Estimating Tree Biomass at Vrious Forest Ecosystem Types in Indonesia. Bogor, Indonesia, Research and Development Center for Conservation and Rehabilitation, Forestry Research and Development Agency, Ministry of Forestry. | |
| Acer Mono Maxim. | Asia | |  | | Wang, C. (2006). "Biomass allometric equations for 10 co-occurring tree species in Chinese temperate forests." Forest Ecology and Management 222(1-3): 9-16 | |
| Butea monospperma | Asia | |  | | Kumar, J.I.N., Sajish, P.R., Kumar, R.N., and Patel, K. 2011. Biomass and Net Primary Productivity in three different Aged Butea Forest Ecosystems in Western India , Rajasthan. Our Nature 9, 73?82. | |
| Acer Mono Maxim. | Asia | |  | | Wang, C. (2006). "Biomass allometric equations for 10 co-occurring tree species in Chinese temperate forests." Forest Ecology and Management 222(1-3): 9-16 | |
| Acacia melanoxylon | North America | |  | | Schubert; T; Strand; R; Cole; T; McDuffie; K; 1988; Equations for predicting biomass of six introduced subtropical tree species; Island of Hawaii; Res; Note PSW-401; Albany; CA; U;S; Department of Agriculture; Forest Service; Pacific Southwest Forest | |
| Pinus merkusii | Asia | |  | | Krisnawati, H., W. C. Adinugroho and R. Imanuddin (2012). Monograph Allometric Models for Estimating Tree Biomass at Vrious Forest Ecosystem Types in Indonesia. Bogor, Indonesia, Research and Development Center for Conservation and Rehabilitation, Forestry Research and Development Agency, Ministry of Forestry. | |
| Eucalyptus phenax | Oceania | |  | | Paul, K. I., S. H. Roxburgh, et al. (2013). "Development and testing of allometric equations for estimating above-ground biomass of mixed-species environmental plantings." Forest Ecology and Management 310(0): 483-494. | |
| Populus tremuloides | North America | |  | | Ker, M. 1980, Tree biomass equations for seven species in southwestern New Brunswick, Inf. Rep. No. M-X-114, Fredericton, NS, Canadian Forestry Service, Maritime Forest Research Center | |
| Eucalyptus stellulata | Oceania | |  | | Paul, K. I., S. H. Roxburgh, et al. (2013). "Development and testing of allometric equations for estimating above-ground biomass of mixed-species environmental plantings." Forest Ecology and Management 310(0): 483-494. | |
| Eucalyptus wandoo | Oceania | |  | | Paul, K. I., S. H. Roxburgh, et al. (2013). "Development and testing of allometric equations for estimating above-ground biomass of mixed-species environmental plantings." Forest Ecology and Management 310(0): 483-494. | |
| Acacia penninervis | Oceania | |  | | Paul, K. I., S. H. Roxburgh, et al. (2013). "Development and testing of allometric equations for estimating above-ground biomass of mixed-species environmental plantings." Forest Ecology and Management 310(0): 483-494. | |
| Nauclea diderichii | Africa | |  | | Onyekwelu, J.C. 2007. Growth, biomass yield and biomass functions for plantation-grown Nauclea diderrichii (de wild) in the humid tropical rainforest zone of south-western Nigeria. Bioresour. Technol. 98: 2679-2687. | |
| Pinus nigra | North America | |  | | Chojnacky; D; 1984; Volume and biomass for curlleaf cercocarpus in Nevada; Res; Pap; INT-332; Ogden; UT; U;S; Department of Agriculture; Forest Service; Intermountain Forest and Range Experiment Station; | |
| General | South America | |  | | Schnitzer, S., DeWalt, S. and Chave, J. 2006. Censusing and Measuring Lianas: A Quantitative Comparison of the Common Methods. Biotropica,(38): 581-591. | |
| Corymbia tesselaris | Oceania | |  | | Paul, K. I., S. H. Roxburgh, et al. (2013). "Development and testing of allometric equations for estimating above-ground biomass of mixed-species environmental plantings." Forest Ecology and Management 310(0): 483-494. | |
| General | South America | |  | | Sierra, C., del Valle, J., Orrego, S., Moreno, F., Harmon, M., Zapata, M., Colorado, G., Herrera, M., Lara, W., Restrepo, D., Berrouet, L., Loaiza, L. and Benjumea, J. 2007. Total Carbon Stocks in a Tropical Forest Landscape of the Porce Region, Colombia. Forest Ecology and Management,(243): 299-309. | |
| General | North America | |  | | Freedman; B; Duinker; P; Barclay; H; Morash; R; Prager; U; 1982; Forest biomass and nutrient studies in central Nova Scotia; Inf; Rep; M-X-134; Fredericton; Nova Scotia; Canadian Forestry Service; Maritimes Forest Research Centre; | |
| Olneya tesota | North America | |  | | Freedman; B; Duinker; P; Barclay; H; Morash; R; Prager; U; 1982; Forest biomass and nutrient studies in central Nova Scotia; Inf; Rep; M-X-134; Fredericton; Nova Scotia; Canadian Forestry Service; Maritimes Forest Research Centre; | |
| General | South America | |  | | Zapata, M., del Valle, J. I. and Orrego, S. A. 2001. Correccion De Sesgos En Modelos Log-Normales Alometricos Linealizados Utilizados Para La Estimacion De La Biomasa Aerea 20 pp. | |
| Eucalyptus occidentalis | Oceania | |  | | Paul, K. I., S. H. Roxburgh, et al. (2013). "Development and testing of allometric equations for estimating above-ground biomass of mixed-species environmental plantings." Forest Ecology and Management 310(0): 483-494. | |
| Quercus Mongolica Fisch. | Asia | |  | | Wang, C. (2006). "Biomass allometric equations for 10 co-occurring tree species in Chinese temperate forests." Forest Ecology and Management 222(1-3): 9-16 | |
| Scorodophloeus zenkeri | Africa | |  | | Kahindo T M., Dimandja L. J. P., Picard N. 2010. Volume equations and biomass estimates for three species in tropical moist forest in the Orientale province, Democratic Republic of Congo.Southern Forests.72:141-146 | |
| Shorea leprosula | Asia | |  | | Krisnawati, H., W. C. Adinugroho and R. Imanuddin (2012). Monograph Allometric Models for Estimating Tree Biomass at Vrious Forest Ecosystem Types in Indonesia. Bogor, Indonesia, Research and Development Center for Conservation and Rehabilitation, Forestry Research and Development Agency, Ministry of Forestry. | |
| Mimosa albida | North America | |  | | RodrÃ­guez R., J. JimÃ©nez, J. Meza, O. Aguirre y R. Razo. 2008. Carbono contenido en un bosque tropical subcaducifolio en la reserva de la biosfera el cielo, Tamaulipas, MÃ©xico. Revista Latinoamericana de Recursos Naturales 4 (2):215 -222. | |
| Robinsonella discolor | North America | |  | | RodrÃ­guez R., J. JimÃ©nez, J. Meza, O. Aguirre y R. Razo. 2008. Carbono contenido en un bosque tropical subcaducifolio en la reserva de la biosfera el cielo, Tamaulipas, MÃ©xico. Revista Latinoamericana de Recursos Naturales 4 (2):215 -222. | |
| Quercus Aquifolioides | Asia | |  | | Liu, X., Liu, S., et al. (2006). "Aboveground Biomass of Quercus aquifolioides Shrub Community and Its Responses to Altitudinal Gradients in Balangshan Mountain, Shichuan Province." Scientia Silvae Sinicae 42(2):1-7 | |
| Lithocarpus Glaber | Asia | |  | | Zhang, K., Xu, X., et al. (2010). "Biomass, and carbon and nitrogen pools in a subtropical evergreen broad-leaved forest in eastern China." Journal of Forest Research 15(4): 274-282 | |
| Quercus spp | North America | |  | | GonzÃ¡lez, M. 2008. EstimaciÃ³n de la biomasa aÃ©rea y la captura de carbono en regeneraciÃ³n natural de Pinus maximinoi H. E. Moore, Pinus oocarpa var. ochoterenai Mtz. Y Quercus sp. en el norte del Estado de Chiapas, MÃ©xico. Tesis de MaestrÃ­a. Centro AgronÃ³mico Tropical de investigaciÃ³n y EnseÃ±anza. Costa Rica. 81 p. | |
| Peumus boldus | South America | |  | | Duran Garate, L. 2005. Evaluacion De La Produccion Y Productividad En Biomasa Aerea De Boldo (Peumus Boldus Mol.) En Un Bosque Esclerofilo De La Comuna De Maria Pinto, Provincia De Melipilla, Region Metropolitana. Universidad de Chile, Santiago, CL. | |
| Pinus banksiana | North America | |  | | MacLean; D; A; Wein; R; W; 1976; Biomass of jack pine and mixed hardwood stands in northeastern New Brunswick; Canadian Journal of Forest Research; 6; 441-447; | |
| Populus deltoides | Asia | |  | | Toky,O.P.,Riddell-Black,D.,Harris,P.J.C.,Vasudevan,P. & Davies, P.A. 2011. Biomass production in short rotation effluent-irrigated plantations in North-West India. Journal of Scientific & Industrial Research, 70: 601?609. | |
| Populus grandidentata | North America | |  | | Freedman; B; 1984; The relationship between the aboveground dry weight and diameter for a wide size range of erect land plants; Canadian Journal of Botany; 62; 2370-2374; | |
| Eucalyptus falcata | Oceania | |  | | Jonson, J. H. and D. Freudenberger (2011). "Restore and sequester: Estimating biomass in native Australian woodland ecosystems for their carbon-funded restoration." Australian Journal of Botany 59(7): 639-652 | |
| General | Asia | |  | | Krisnawati, H., W. C. Adinugroho and R. Imanuddin (2012). Monograph Allometric Models for Estimating Tree Biomass at Vrious Forest Ecosystem Types in Indonesia. Bogor, Indonesia, Research and Development Center for Conservation and Rehabilitation, Forestry Research and Development Agency, Ministry of Forestry. | |
| Acacia mangium | Asia | |  | | Krisnawati, H., W. C. Adinugroho and R. Imanuddin (2012). Monograph Allometric Models for Estimating Tree Biomass at Vrious Forest Ecosystem Types in Indonesia. Bogor, Indonesia, Research and Development Center for Conservation and Rehabilitation, Forestry Research and Development Agency, Ministry of Forestry. | |
| Picea glauca | North America | |  | | Ker; M; 1984; Biomass equations for seven major maritimes tree species; Inf; Rep; M-X-148; Fredericton; NS; Canadian Forestry Service; Maritime Forest Research Center; | |
| Pseudotsuga menziesii | North America | |  | | Helgerson; O; Cromack; K; Stafford; S; Miller; R; Slagle; R; 1988; Equations for estimating aboveground components of young Douglas-fir and red alder in a coastal Oregon plantation; Canadian Journal of Forest Research; 18; 1082-1085; | |
| General | Africa | |  | | Vieilledent G., R. Vaudry, S. F. D. Andriamanohisoa, O. S. Rakotonarivo, H. Z. Randrianasolo, H. N. Razafindrabe, C. Bidaud Rakotoarivony, J. Ebeling, and M. Rasamoelina. 2012. A universal approach to estimate biomass and carbon stock in tropical forests using generic allometric models. Ecological Applications 22:572â€“583. | |
| Faramea flavicans | South America | |  | | Perez Lara, M; Diaz Timote, J. 2010. Estimacion del carbono contenido en la biomasa forestal aerea de dos bosques andinos en los departamentos de Santander y Cundinamarca. Ing. Forestal. CO., Universidad Distrital Francisco Jose de Caldas. 87 p. p. | |
| Populus tremuloides | North America | |  | | Campbell; J; S; Lieffers; V; J; Pielou; E; C; 1985; Regression equations for estimating single tree biomass of trembling aspen; assessing their applicability to more than one population; Forest Ecology and Management; 11; 283-295; | |
| Quercus coccinea | North America | |  | | Whittaker, R. H.; Woodwell, G. M. 1968. Dimension and production relations of trees and shrubs in the Brookhaven Forest, New York. Journal of Ecology. 56: 1-25. | |
| Clusia shomburgkiana | South America | |  | | Perez Lara, M; Diaz Timote, J. 2010. Estimacion del carbono contenido en la biomasa forestal aerea de dos bosques andinos en los departamentos de Santander y Cundinamarca. Ing. Forestal. CO., Universidad Distrital Francisco Jose de Caldas. 87 p. p. | |
| Bambusa procera | Asia | |  | | Phuong, V.T., Xuan, N.X., Trieu, D.T., D., Trung, P.D., Giap, N.X., Thanh, P.N. (2012) Tree allometric equation development for estimation of forest above-ground biomass in Viet Nam -- Evergreen broadleaf, Deciduous, and Bamboo forests in the Central Highland region in (Eds) Inoguchi, A., Henry, M. Birigazzi, L. Sola, G. Tree allometric equation development for estimation of forest above-ground biomass in Viet Nam, UN-REDD Programme, Hanoi, Viet Nam | |
| Gironniera subaequalis | Asia | |  | | Lv, X., Tang, J., et al. (2007). "Biomass and its allocation in tropical seasonal rainforest in Xishuangbanna, Southwest China." Journal of Plant Ecology 31(1): 11-22 | |
| General | Asia | |  | | Banaticla, M. R. N., R. F. Sales and R. D. Lasco (2007). "Biomass equations for tropical tree plantation species using secondary data from the Philippines." Annals of Tropical Research 29(3): 73-90. | |
| Rhizophora mucronata | Africa | |  | | Kairo J. G., Bosire J., Langat J., Kirui B., Koedam N. 2009. Allometry and biomass distribution in replanted mangrove plantations at Gazi Bay, Kenya.Aquatic Conservation: Marine and Freshwater Ecosystems.19:63-69 | |
| Acacia mangium | Asia | |  | | Krisnawati, H., W. C. Adinugroho and R. Imanuddin (2012). Monograph Allometric Models for Estimating Tree Biomass at Vrious Forest Ecosystem Types in Indonesia. Bogor, Indonesia, Research and Development Center for Conservation and Rehabilitation, Forestry Research and Development Agency, Ministry of Forestry. | |
| Pinus leiophylla | North America | |  | | NÃ¡var, J. 2009. Allometric equations for tree species and carbon stocks for forests of northwestern Mexico.Forest Ecology and Management 257:427-434 | |
| Paraserianthes falcataria | Asia | |  | | Banaticla, M. R. N., R. F. Sales and R. D. Lasco (2007). "Biomass equations for tropical tree plantation species using secondary data from the Philippines." Annals of Tropical Research 29(3): 73-90. | |
| Liquidambar Formosana Hance | Asia | |  | | Zhang, K., Xu, X., et al. (2010). "Biomass, and carbon and nitrogen pools in a subtropical evergreen broad-leaved forest in eastern China." Journal of Forest Research 15(4): 274-282 | |
| General | Africa | |  | | Kaire, 1999. La production ligneuse des jacheres et son utilisation par l'homme au Senegal, Universite de Provence Marseille, France. | |
| General | Africa | |  | | Vieilledent G., R. Vaudry, S. F. D. Andriamanohisoa, O. S. Rakotonarivo, H. Z. Randrianasolo, H. N. Razafindrabe, C. Bidaud Rakotoarivony, J. Ebeling, and M. Rasamoelina. 2012. A universal approach to estimate biomass and carbon stock in tropical forests using generic allometric models. Ecological Applications 22:572â€“583. | |
| Quercus magnoliifolia | North America | |  | | Gomez, J., J. Etchevers, A. Monterrosos, J.Campo y J. Tinoco. 2011. Ecuaciones alomÃ©tricas para estimar biomasa y carbono en Quercus magnoliaefolia. Revista Chapingo Serie Ciencias Forestales y del Ambiente 17(2): 261-272. | |
| Quercus spp | North America | |  | | Aguilar, R., A. Ghilardi, E. Vega, M. Skutsch y K. Oyama. 2012. Sprouting productivity and allometric relationships of two oak species managed for traditional charcoal making in central Mexico. Biomass and Bioenergy 36: 192-207. | |
| General | Africa | |  | | Djomo A. N., Ibrahima A., Saborowski J., Gravenhorst G., 2010. Allometric equations for biomass equations for biomass estimations in Cameroon and pan moist tropical equations including biomass data from Africa.Forest Ecology and Management.260:1863-1885 | |
| Betula alleghaniensis | North America | |  | | Siccama; T; G; Hamburg; S; P; Arthur; M; A; Yanai; R; D; Bormann; F; H; Likens; G; E; 1994; Corrections to allometric equations and plant tissue chemistry for Hubbard Brook Experimental Forest; Ecology; 75; 246-248; | |
| Pinus sylvestris | Europe | |  | | Oleksyn, J., Reich, P.B., Chalupka, W. and Tjoelker, M.G. 1999. Differential above- and below-ground biomass accumulation of European Pinus sylvestris populations in a 12-year-old provenance experiment. Scandinavian Journal of Forest Research (14) 1-17 | |
| Betula populifolia | North America | |  | | Ker, M. 1980, Tree biomass equations for seven species in southwestern New Brunswick, Inf. Rep. No. M-X-114, Fredericton, NS, Canadian Forestry Service, Maritime Forest Research Center | |
| Larix laricina | North America | |  | | Ker, M. 1980, Tree biomass equations for seven species in southwestern New Brunswick, Inf. Rep. No. M-X-114, Fredericton, NS, Canadian Forestry Service, Maritime Forest Research Center | |
| Eucalyptus cypellocarpa | Oceania | |  | | Bi, H., J. Turner, et al. (2004). "Additive biomass equations for native eucalypt forest trees of temperate Australia." Trees 18(4): 467-479 | |
| Elaeis guineensis | Asia | |  | | Krisnawati, H., W. C. Adinugroho and R. Imanuddin (2012). Monograph Allometric Models for Estimating Tree Biomass at Vrious Forest Ecosystem Types in Indonesia. Bogor, Indonesia, Research and Development Center for Conservation and Rehabilitation, Forestry Research and Development Agency, Ministry of Forestry. | |
| Acacia auriculiformis | Asia | |  | | Kumar, B.M., George, S.J., Jamaludheen, V. & Suresh, T.K. 1998. Comparison of biomass production , tree allometry and nutrient use efficiency of multipurpose trees grown in woodlot and silvopastoral experiments in Kerala , India. Forest Ecology and Management, 112: 145?163. | |
| General | South America | |  | | Salis, S. M., Assis, M. A., Mattos, P. P. and Piao, A. C. S. 2006. Estimating the Aboveground Biomass and Wood Volume of Savanna Woodlands in Brazils Pantanal Wetlands Based on Allometric Correlations. Forest Ecology and Management,(228): 61-68. | |
| Clethra mexicana | North America | |  | | Acosta, M., F. Carrillo y R. GÃ³mez. 2011. EstimaciÃ³n de biomasa y carbono en dos especies de bosque mesÃ³filo de montaÃ±a. Revista Mexicana de Ciencias AgrÃ­colas 2(4): 529-543. | |
| Compsoneura rigidifolia | South America | |  | | Perez Lara, M; Diaz Timote, J. 2010. Estimacion del carbono contenido en la biomasa forestal aerea de dos bosques andinos en los departamentos de Santander y Cundinamarca. Ing. Forestal. CO., Universidad Distrital Francisco Jose de Caldas. 87 p. p. | |
| Drimys granatensis | South America | |  | | Perez Lara, M; Diaz Timote, J. 2010. Estimacion del carbono contenido en la biomasa forestal aerea de dos bosques andinos en los departamentos de Santander y Cundinamarca. Ing. Forestal. CO., Universidad Distrital Francisco Jose de Caldas. 87 p. p. | |
| Clusia shomburgkiana | South America | |  | | Perez Lara, M; Diaz Timote, J. 2010. Estimacion del carbono contenido en la biomasa forestal aerea de dos bosques andinos en los departamentos de Santander y Cundinamarca. Ing. Forestal. CO., Universidad Distrital Francisco Jose de Caldas. 87 p. p. | |
| General | South America | |  | | Perez Lara, M; Diaz Timote, J. 2010. Estimacion del carbono contenido en la biomasa forestal aerea de dos bosques andinos en los departamentos de Santander y Cundinamarca. Ing. Forestal. CO., Universidad Distrital Francisco Jose de Caldas. 87 p. p. | |
| Abies Nephrolepis | Asia | |  | | Wang, J., Zhang, C., et al. (2011). "Biomass Structure and Allometry of Abies nephrolepis (Maxim) in Northeast China." Silva Fennica 45(2): 211-226 | |
| Compsoneura rigidifolia | South America | |  | | Perez Lara, M; Diaz Timote, J. 2010. Estimacion del carbono contenido en la biomasa forestal aerea de dos bosques andinos en los departamentos de Santander y Cundinamarca. Ing. Forestal. CO., Universidad Distrital Francisco Jose de Caldas. 87 p. p. | |
| Rhizophora apiculata | Asia | |  | | Krisnawati, H., W. C. Adinugroho and R. Imanuddin (2012). Monograph Allometric Models for Estimating Tree Biomass at Vrious Forest Ecosystem Types in Indonesia. Bogor, Indonesia, Research and Development Center for Conservation and Rehabilitation, Forestry Research and Development Agency, Ministry of Forestry. | |
| Pinus teocote | North America | |  | | Aguirre, O. y J. JimÃ©nez. 2011. EvaluaciÃ³n del contenido de carbono en bosques del sur de Nuevo LeÃ³n. Revista Mexicana de Ciencias Forestales 2 (6): 73-83. | |
| Abies amabilis | North America | |  | | Krumlik; G; J; Kimmins; J; P; 1973; Studies of biomass distribution and tree form in old virgin forests in the mountains of south coastal British Columbia; Canada; In; Young; H; ed; IUFRO biomass studies; Nancy; France and Vancouver; BC; Orono; ME; Univ | |
| Harpalyce arborescens | North America | |  | | RodrÃ­guez R., J. JimÃ©nez, J. Meza, O. Aguirre y R. Razo. 2008. Carbono contenido en un bosque tropical subcaducifolio en la reserva de la biosfera el cielo, Tamaulipas, MÃ©xico. Revista Latinoamericana de Recursos Naturales 4 (2):215 -222. | |
| Terminalia sericea | Africa | |  | | de Klerk, J.N. 2002. Bush encroachment in Namibia. Report on Phase 1 of the Bush Encroachment Research. Monitoring and Management Project, Ministry of Environment and Tourism. | |
| Vatairea paraensis | South America | |  | | Overman, JPM; Witte, HJL; Saldarriaga, JG. 1994. Evaluation of regression models for above-ground biomass determination in Amazon Rainforest. Journal of Tropical Ecology 10(2). | |
| Acer saccharum | North America | |  | | Freedman; B; 1984; The relationship between the aboveground dry weight and diameter for a wide size range of erect land plants; Canadian Journal of Botany; 62; 2370-2374; | |
| Acer rubrum | North America | |  | | Martin; J; Kloeppel; B; Schaefer; T; Kimbler; D; McNulty; S; 1998; Aboveground biomass and nitrogen allocation of ten deciduous southern Appalachian tree species; Canadian Journal of Forest Research; 28; 1648-1659; | |
| Eucalyptus camaldulensis | Asia | |  | | Ranasinghe, D.M.S.H.K. & Mayhead, G.J. 1991. Dry matter content and its distribution in an age series of Eucalyptus camaldulensis(Dehn.)plantations in Srilanka. Forest Ecology and Management, 41: 137?142. | |
| Eucalyptus captiosa | Oceania | |  | | Jonson, J. H. and D. Freudenberger (2011). "Restore and sequester: Estimating biomass in native Australian woodland ecosystems for their carbon-funded restoration." Australian Journal of Botany 59(7): 639-652 | |
| Nectandra sanguinea | North America | |  | | RodrÃ­guez R., J. JimÃ©nez, O. Aguirre, E. TreviÃ±o y E. TreviÃ±o. 2006. EstimaciÃ³n de carbono almacenado de niebla en Tamaulipas, MÃ©xico. Ciencia UANL 9(2): 179-188. | |
| Eucalyptus tereticornis | Oceania | |  | | Paul, K. I., S. H. Roxburgh, et al. (2013). "Development and testing of allometric equations for estimating above-ground biomass of mixed-species environmental plantings." Forest Ecology and Management 310(0): 483-494. | |
| Ailanthus triphysa | Asia | |  | | Kumar, B.M., George, S.J., Jamaludheen, V. & Suresh, T.K. 1998. Comparison of biomass production , tree allometry and nutrient use efficiency of multipurpose trees grown in woodlot and silvopastoral experiments in Kerala , India. Forest Ecology and Management, 112: 145?163. | |
| Leucaena leucocephala | Asia | |  | | Tandug, L. M. (1986). "Biomass prediction equations for giant ipil-ipil (Leucaena leucocephala (Lam.) de Wit)." Sylvatrop Philippine Forest Resources Journal 11(1 & 2): 1-22. | |
| Tsuga mertensiana | North America | |  | | Krumlik; G; J; Kimmins; J; P; 1973; Studies of biomass distribution and tree form in old virgin forests in the mountains of south coastal British Columbia; Canada; In; Young; H; ed; IUFRO biomass studies; Nancy; France and Vancouver; BC; Orono; ME; Univ | |
| Acacia mangium | Asia | |  | | Miyakuni, K., I. Heriansyah, N. M. Heriyanto and Y. Kiyono (2004). "Allometric biomass equations, biomas expansion factors and root-to-shoot ratios of planted Acacia mangium Willd. Forests in West Java, Indonesia." Japan Society of Forest Planning 10: 69-76. | |
| Acacia mangium | Asia | |  | | Krisnawati, H., W. C. Adinugroho and R. Imanuddin (2012). Monograph Allometric Models for Estimating Tree Biomass at Vrious Forest Ecosystem Types in Indonesia. Bogor, Indonesia, Research and Development Center for Conservation and Rehabilitation, Forestry Research and Development Agency, Ministry of Forestry. | |
| Blakea granatensis | South America | |  | | Perez Lara, M; Diaz Timote, J. 2010. Estimacion del carbono contenido en la biomasa forestal aerea de dos bosques andinos en los departamentos de Santander y Cundinamarca. Ing. Forestal. CO., Universidad Distrital Francisco Jose de Caldas. 87 p. p. | |
| Acmena graveolens | Oceania | |  | | Liddell, M. J., N. Nieullet, et al. (2007). "Assessing the above-ground biomass of a complex tropical rainforest using a canopy crane." Austral Ecology 32(1): 43-58 | |
| Pinus Koraiensis Sieb. et Zucc. | Asia | |  | | Wang, C. (2006). "Biomass allometric equations for 10 co-occurring tree species in Chinese temperate forests." Forest Ecology and Management 222(1-3): 9-16 | |
| Shorea robusta | Asia | |  | | Laamanen, R., Joshi, M.R. & Sharma, S.P. 1995. Biomass and volume models for Sal(Shorea robusta) in the central Terai of Nepal. . | |
| General | South America | |  | | Perez Lara, M; Diaz Timote, J. 2010. Estimacion del carbono contenido en la biomasa forestal aerea de dos bosques andinos en los departamentos de Santander y Cundinamarca. Ing. Forestal. CO., Universidad Distrital Francisco Jose de Caldas. 87 p. p. | |
| Quercus ilex | Europe | |  | | Ferres, L., Roda, F., Verdu, A.M.C. and Terradas, J. 1980. Estructura y funcionalismo de un encinar montano en el Montseny. II. Biomasa arborea. Mediterranea (4) 23-36 | |
| Acacia mangium | Asia | |  | | Miyakuni, K., I. Heriansyah, N. M. Heriyanto and Y. Kiyono (2004). "Allometric biomass equations, biomas expansion factors and root-to-shoot ratios of planted Acacia mangium Willd. Forests in West Java, Indonesia." Japan Society of Forest Planning 10: 69-76. | |
| Bambusa balcooa | Asia | |  | | Nath, A.J., Das, G. & Das, A.K. 2009. Above ground standing biomass and carbon storage in village bamboos in North East India. Biomass and Bioenergy, 33(9): 1188?1196. | |
| Shorea contorta | Asia | |  | | Santos Martin, F., R. M. Navarro-Cerrillo, R. Mulia and M. Noordwijk (2010). "Allometric equations based on a fractal branching model for estimating aboveground biomass of four native tree species in the Philippines." Agroforestry Systems 78(3): 193-202. | |
| Theobroma cacao | South America | |  | | Rojas-GarcÃ­a, F., P. MartÃ­nez-Zurimendi, M. OlguÃ­n y B. De Jong. 2009. Ecuaciones alomÃ©tricas para estimar biomasa aÃ©rea en MÃ©xico. ECOSUR-CONAFOR. InÃ©dito. | |
| Leucaena leucocephala | Asia | |  | | Tandug, L. M. (1986). "Biomass prediction equations for giant ipil-ipil (Leucaena leucocephala (Lam.) de Wit)." Sylvatrop Philippine Forest Resources Journal 11(1 & 2): 1-22. | |
| Bambusa vulgaris | Asia | |  | | Nath, A.J., Das, G. & Das, A.K. 2009. Above ground standing biomass and carbon storage in village bamboos in North East India. Biomass and Bioenergy, 33(9): 1188?1196. | |
| Eucalyptus camaldulensis | Oceania | |  | | Paul, K. I., S. H. Roxburgh, et al. (2013). "Development and testing of allometric equations for estimating above-ground biomass of mixed-species environmental plantings." Forest Ecology and Management 310(0): 483-494. | |
| Eucalyptus moluccana | Oceania | |  | | Paul, K. I., S. H. Roxburgh, et al. (2013). "Development and testing of allometric equations for estimating above-ground biomass of mixed-species environmental plantings." Forest Ecology and Management 310(0): 483-494. | |
| Hesperomeles goudotiana | South America | |  | | Perez Lara, M; Diaz Timote, J. 2010. Estimacion del carbono contenido en la biomasa forestal aerea de dos bosques andinos en los departamentos de Santander y Cundinamarca. Ing. Forestal. CO., Universidad Distrital Francisco Jose de Caldas. 87 p. p. | |
| Acacia nilotica | Asia | |  | | Raizada, A., Rao, M.S.R.M., Nambiar, K.T.N. & Padmaiah, M. 2007. Biomass production and prediction models for Acacia nilotica affected vertisols in Karnataka. Indian Forester, 133(1): 239?246. | |
| Acacia nilotica | Asia | |  | | Singh, V. & Toky, O.P. 1995. Biomass Acacia and net primary productivity and Eucalyptus , (? energy ?) plantations in arid in Leucaena , high density India. Journal of Arid Environments, 31: 301?309. | |
| Elmerrillia celebica | Asia | |  | | Krisnawati, H., W. C. Adinugroho and R. Imanuddin (2012). Monograph Allometric Models for Estimating Tree Biomass at Vrious Forest Ecosystem Types in Indonesia. Bogor, Indonesia, Research and Development Center for Conservation and Rehabilitation, Forestry Research and Development Agency, Ministry of Forestry. | |
| General | Asia | |  | | Basuki, T. M., P. E. van Laake, A. K. Skidmore and Y. A. Hussin (2009). "Allometric equations for estimating the above-ground biomass in tropical lowland Dipterocarp forests." Forest Ecology and Management 257(8): 1684-1694 | |
| Clethra pringlei | North America | |  | | RodrÃ­guez R., J. JimÃ©nez, O. Aguirre, E. TreviÃ±o y E. TreviÃ±o. 2006. EstimaciÃ³n de carbono almacenado de niebla en Tamaulipas, MÃ©xico. Ciencia UANL 9(2): 179-188. | |
| Lumnitzera spp | Asia | |  | | Nam pers. Comm., 2010 | |
| Pinus merkusii | Asia | |  | | Krisnawati, H., W. C. Adinugroho and R. Imanuddin (2012). Monograph Allometric Models for Estimating Tree Biomass at Vrious Forest Ecosystem Types in Indonesia. Bogor, Indonesia, Research and Development Center for Conservation and Rehabilitation, Forestry Research and Development Agency, Ministry of Forestry. | |
| Paraserianthes falcataria | Asia | |  | | Krisnawati, H., W. C. Adinugroho and R. Imanuddin (2012). Monograph Allometric Models for Estimating Tree Biomass at Vrious Forest Ecosystem Types in Indonesia. Bogor, Indonesia, Research and Development Center for Conservation and Rehabilitation, Forestry Research and Development Agency, Ministry of Forestry. | |
| Vatairea paraensis | South America | |  | | Overman, JPM; Witte, HJL; Saldarriaga, JG. 1994. Evaluation of regression models for above-ground biomass determination in Amazon Rainforest. Journal of Tropical Ecology 10(2). | |
| Populus tremuloides | North America | |  | | MacLean; D; A; Wein; R; W; 1976; Biomass of jack pine and mixed hardwood stands in northeastern New Brunswick; Canadian Journal of Forest Research; 6; 441-447; | |
| Eucalyptus kochii | Oceania | |  | | Paul, K. I., S. H. Roxburgh, et al. (2013). "Development and testing of allometric equations for estimating above-ground biomass of mixed-species environmental plantings." Forest Ecology and Management 310(0): 483-494. | |
| Acacia pycnantha | Oceania | |  | | Paul, K. I., S. H. Roxburgh, et al. (2013). "Development and testing of allometric equations for estimating above-ground biomass of mixed-species environmental plantings." Forest Ecology and Management 310(0): 483-494. | |
| Eucalyptus grandis | Asia | |  | | Tandon, V.N., Pande, M.C. & Singh, R. 1988. Biomass estimation and distribution of nutrients in five different aged Eucalyptus grandis plantation ecosystems in Kerala state. Indian Forester, 114(4): 184?199. | |
| Cupressus macrocarpa | Asia | |  | | Rai, S.N. & Proctor, J. 1986. Ecological studies on four rainforests in karnataka , india. Journal of Ecology, 74(2): 439?454. | |
| Abies Nephrolepis | Asia | |  | | Wang, J., Zhang, C., et al. (2011). "Biomass Structure and Allometry of Abies nephrolepis (Maxim) in Northeast China." Silva Fennica 45(2): 211-226 | |
| General | Asia | |  | | Banaticla, M. R. N., R. F. Sales and R. D. Lasco (2007). "Biomass equations for tropical tree plantation species using secondary data from the Philippines." Annals of Tropical Research 29(3): 73-90. | |
| Betula alleghaniensis | North America | |  | | Morrison; I; 1990; Organic matter and mineral distribution in an old-growth Acer saccharum forest near the northern limit of its range; Canadian Journal of Forest Research; 20; 1332-1342; | |
| Pinus taeda | North America | |  | | Van Lear, D.; Waide, J.; Teuke, M. 1984. Biomass and nutrient content of a 41-year-old loblolly pine (Pinus taeda L.) plantation on a poor site in South Carolina. Forest Science. 30: 395-404. | |
| Terminalia amazonia | North America | |  | | Arreaga Gramajo, W. 2002. Almacenamiento del carbono en bosques con manejo forestal sostenible en la Reserva de Biosfera Maya, Peten, Guatemala. Tesis Mag. Sc. Turrialba, CR., CATIE. 86 p. p. | |
| Acacia mangium | Asia | |  | | Krisnawati, H., W. C. Adinugroho and R. Imanuddin (2012). Monograph Allometric Models for Estimating Tree Biomass at Vrious Forest Ecosystem Types in Indonesia. Bogor, Indonesia, Research and Development Center for Conservation and Rehabilitation, Forestry Research and Development Agency, Ministry of Forestry. | |
| Acacia stenophylla | Oceania | |  | | Paul, K. I., S. H. Roxburgh, et al. (2013). "Development and testing of allometric equations for estimating above-ground biomass of mixed-species environmental plantings." Forest Ecology and Management 310(0): 483-494. | |
| Clusia cruciata | South America | |  | | Perez Lara, M; Diaz Timote, J. 2010. Estimacion del carbono contenido en la biomasa forestal aerea de dos bosques andinos en los departamentos de Santander y Cundinamarca. Ing. Forestal. CO., Universidad Distrital Francisco Jose de Caldas. 87 p. p. | |
| Eucalyptus annulata | Oceania | |  | | Paul, K. I., S. H. Roxburgh, et al. (2013). "Development and testing of allometric equations for estimating above-ground biomass of mixed-species environmental plantings." Forest Ecology and Management 310(0): 483-494. | |
| Butea monospperma | Asia | |  | | Kumar, J.I.N., Sajish, P.R., Kumar, R.N., and Patel, K. 2011. Biomass and Net Primary Productivity in three different Aged Butea Forest Ecosystems in Western India , Rajasthan. Our Nature 9, 73?82. | |
| Shorea leprosula | Asia | |  | | Krisnawati, H., W. C. Adinugroho and R. Imanuddin (2012). Monograph Allometric Models for Estimating Tree Biomass at Vrious Forest Ecosystem Types in Indonesia. Bogor, Indonesia, Research and Development Center for Conservation and Rehabilitation, Forestry Research and Development Agency, Ministry of Forestry. | |
| Eucalyptus leucoxylon | Oceania | |  | | Paul, K. I., S. H. Roxburgh, et al. (2013). "Development and testing of allometric equations for estimating above-ground biomass of mixed-species environmental plantings." Forest Ecology and Management 310(0): 483-494. | |
| General | Asia | |  | | Banaticla, M. R. N., R. F. Sales and R. D. Lasco (2007). "Biomass equations for tropical tree plantation species using secondary data from the Philippines." Annals of Tropical Research 29(3): 73-90. | |
| Piper aduncum | Asia | |  | | Krisnawati, H., W. C. Adinugroho and R. Imanuddin (2012). Monograph Allometric Models for Estimating Tree Biomass at Vrious Forest Ecosystem Types in Indonesia. Bogor, Indonesia, Research and Development Center for Conservation and Rehabilitation, Forestry Research and Development Agency, Ministry of Forestry. | |
| Cavendishia cordifolia | South America | |  | | Perez Lara, M; Diaz Timote, J. 2010. Estimacion del carbono contenido en la biomasa forestal aerea de dos bosques andinos en los departamentos de Santander y Cundinamarca. Ing. Forestal. CO., Universidad Distrital Francisco Jose de Caldas. 87 p. p. | |
| Alnus jorullensis | North America | |  | | JuÃ¡rez, B. 2008. Uso de ecuaciones alomÃ©tricas para estimar de biomasa y carbono de Alnus jorullensis H. B. K. spp. jurullensis en bosques mezclados de Tequexquinahuac, Texcoco, MÃ©xico. Tesis Profesional. Universidad AutÃ³noma Chapingo, MÃ©xico. 63 p. | |
| General | Asia | |  | | Kenzo, T., Furutani R., Hattori D., Jawa Kendawang J., Tanaka S. & Sakurai K., Ninomiya I. 2009. Allometric equations for accurate estimation of above-ground biomass in logged-over tropical rainforests in Sarawak, Malaysia. Journal of Forest Research, (14) : 365-372 | |
| Vatairea paraensis | South America | |  | | Overman, JPM; Witte, HJL; Saldarriaga, JG. 1994. Evaluation of regression models for above-ground biomass determination in Amazon Rainforest. Journal of Tropical Ecology 10(2). | |
| Bambusa cacharensis | Asia | |  | | Nath, A.J., Das, G. & Das, A.K. 2009. Above ground standing biomass and carbon storage in village bamboos in North East India. Biomass and Bioenergy, 33(9): 1188?1196. | |
| Rhizophora apiculata | Asia | |  | | Krisnawati, H., W. C. Adinugroho and R. Imanuddin (2012). Monograph Allometric Models for Estimating Tree Biomass at Vrious Forest Ecosystem Types in Indonesia. Bogor, Indonesia, Research and Development Center for Conservation and Rehabilitation, Forestry Research and Development Agency, Ministry of Forestry. | |
| General | South America | |  | | Sierra, C., del Valle, J., Orrego, S., Moreno, F., Harmon, M., Zapata, M., Colorado, G., Herrera, M., Lara, W., Restrepo, D., Berrouet, L., Loaiza, L. and Benjumea, J. 2007. Total Carbon Stocks in a Tropical Forest Landscape of the Porce Region, Colombia. Forest Ecology and Management,(243): 299-309. | |
| Quercus spp | North America | |  | | DomÃ­nguez, G., O. Aguirre, J. JimÃ©nez,R. RodrÃ­guezy J. DÃ­az. 2009. Biomasa aÃ©rea y factores de expansiÃ³n de especies arbÃ³reas en bosques del sur de Nuevo LeÃ³n. Revista Chapingo Serie Ciencias Forestales y del Ambiente 15(1): 59-64. | |
| granatensis granatensis | South America | |  | | Perez Lara, M; Diaz Timote, J. 2010. Estimacion del carbono contenido en la biomasa forestal aerea de dos bosques andinos en los departamentos de Santander y Cundinamarca. Ing. Forestal. CO., Universidad Distrital Francisco Jose de Caldas. 87 p. p. | |
| Betula populifolia | North America | |  | | Freedman; B; 1984; The relationship between the aboveground dry weight and diameter for a wide size range of erect land plants; Canadian Journal of Botany; 62; 2370-2374; | |
| Eucalyptus leptophylla | Oceania | |  | | Paul, K. I., S. H. Roxburgh, et al. (2013). "Development and testing of allometric equations for estimating above-ground biomass of mixed-species environmental plantings." Forest Ecology and Management 310(0): 483-494. | |
| Acacia saligna | Oceania | |  | | Jonson, J. H. and D. Freudenberger (2011). "Restore and sequester: Estimating biomass in native Australian woodland ecosystems for their carbon-funded restoration." Australian Journal of Botany 59(7): 639-652 | |
| Acacia micobotrya | Oceania | |  | | Paul, K. I., S. H. Roxburgh, et al. (2013). "Development and testing of allometric equations for estimating above-ground biomass of mixed-species environmental plantings." Forest Ecology and Management 310(0): 483-494. | |
| General | South America | |  | | Perez Lara, M; Diaz Timote, J. 2010. Estimacion del carbono contenido en la biomasa forestal aerea de dos bosques andinos en los departamentos de Santander y Cundinamarca. Ing. Forestal. CO., Universidad Distrital Francisco Jose de Caldas. 87 p. p. | |
| Ipomoea arborescens | North America | |  | | GÃ³mez, J. 2008. DeterminaciÃ³n de los almacenes de carbono en los compartimentos aÃ¨reo y subterrÃ neo de dos tios de vegetaciÃ³n en la reserva de la bÃ³sfera"Sierra de Huatla", Morelos, MÃ©xico. Tesis Doctoral . Colegio de Postgraduados. MÃ©xico. 194p. | |
| Inga vera | North America | |  | | Douterlungne, D. 2013. Ãrboles de rÃ¡pido crecimiento para la restauraciÃ³n ecolÃ³gica y la captura de carbono en el trÃ³pico hÃºmedo de MÃ©xico. Tesis de Doctorado. El Colegio de la Frontera Sur. MÃ©xico. 83 p. | |
| Conzattia multiflora | North America | |  | | GÃ³mez, J. 2008. DeterminaciÃ³n de los almacenes de carbono en los compartimentos aÃ¨reo y subterrÃ neo de dos tios de vegetaciÃ³n en la reserva de la bÃ³sfera"Sierra de Huatla", Morelos, MÃ©xico. Tesis Doctoral . Colegio de Postgraduados. MÃ©xico. 194p. | |
| Quercus spp | North America | |  | | RodrÃ­guez R., J. JimÃ©nez, O. Aguirre, E. TreviÃ±o y R. Razo. 2009. EstimaciÃ³n de carbono almacenado en el bosque de pino-encino en la Reserva de la Biosfera el Cielo, Tamaulipas, MÃ©xico. Ra Ximhai 5 (3): 317-327. | |
| Butea monospperma | Asia | |  | | Kumar, J.I.N., Sajish, P.R., Kumar, R.N., and Patel, K. 2011. Biomass and Net Primary Productivity in three different Aged Butea Forest Ecosystems in Western India , Rajasthan. Our Nature 9, 73?82. | |
| Eucalyptus flocktoniae | Oceania | |  | | Jonson, J. H. and D. Freudenberger (2011). "Restore and sequester: Estimating biomass in native Australian woodland ecosystems for their carbon-funded restoration." Australian Journal of Botany 59(7): 639-652 | |
| General | South America | |  | | Perez Lara, M; Diaz Timote, J. 2010. Estimacion del carbono contenido en la biomasa forestal aerea de dos bosques andinos en los departamentos de Santander y Cundinamarca. Ing. Forestal. CO., Universidad Distrital Francisco Jose de Caldas. 87 p. p. | |
| Betula papyrifera | North America | |  | | Ker, M. 1980, Tree biomass equations for seven species in southwestern New Brunswick, Inf. Rep. No. M-X-114, Fredericton, NS, Canadian Forestry Service, Maritime Forest Research Center | |
| Acacia saligna | Oceania | |  | | Paul, K. I., S. H. Roxburgh, et al. (2013). "Development and testing of allometric equations for estimating above-ground biomass of mixed-species environmental plantings." Forest Ecology and Management 310(0): 483-494. | |
| Abies balsamea | North America | |  | | Freedman; B; 1984; The relationship between the aboveground dry weight and diameter for a wide size range of erect land plants; Canadian Journal of Botany; 62; 2370-2374; | |
| Pinus resinosa | North America | |  | | Bockheim; J; Lee; S; 1984; Biomass and net primary production equations for thinned red pine plantations in central Wisconsin; For; Res; Notes 256; Madison; WI; University of Wisconsin; College of Agriculture; | |
| Eucalyptus socialis | Oceania | |  | | Paul, K. I., S. H. Roxburgh, et al. (2013). "Development and testing of allometric equations for estimating above-ground biomass of mixed-species environmental plantings." Forest Ecology and Management 310(0): 483-494. | |
| Eucalyptus melliodora | Oceania | |  | | Paul, K. I., S. H. Roxburgh, et al. (2013). "Development and testing of allometric equations for estimating above-ground biomass of mixed-species environmental plantings." Forest Ecology and Management 310(0): 483-494. | |
| Carya spp | North America | |  | | Martin; J; Kloeppel; B; Schaefer; T; Kimbler; D; McNulty; S; 1998; Aboveground biomass and nitrogen allocation of ten deciduous southern Appalachian tree species; Canadian Journal of Forest Research; 28; 1648-1659; | |
| Pterocarpus indicus | Asia | |  | | Santos Martin, F., R. M. Navarro-Cerrillo, R. Mulia and M. Noordwijk (2010). "Allometric equations based on a fractal branching model for estimating aboveground biomass of four native tree species in the Philippines." Agroforestry Systems 78(3): 193-202. | |
| Shorea leprosula | Asia | |  | | Krisnawati, H., W. C. Adinugroho and R. Imanuddin (2012). Monograph Allometric Models for Estimating Tree Biomass at Vrious Forest Ecosystem Types in Indonesia. Bogor, Indonesia, Research and Development Center for Conservation and Rehabilitation, Forestry Research and Development Agency, Ministry of Forestry. | |
| Alfaroa colombiana | South America | |  | | Perez Lara, M; Diaz Timote, J. 2010. Estimacion del carbono contenido en la biomasa forestal aerea de dos bosques andinos en los departamentos de Santander y Cundinamarca. Ing. Forestal. CO., Universidad Distrital Francisco Jose de Caldas. 87 p. p. | |
| General | Africa | |  | | Chamshama, S.A.O., Mugasha, A.G. and Zahabu, E. 2004. Stand biomass and volume estimation for Miombo Woodlands at Kitulangalo, Morogoro, Tanzania. South African Forestry Journal 200: 59-70. | |
| Quercus humboldtii | South America | |  | | Perez Lara, M; Diaz Timote, J. 2010. Estimacion del carbono contenido en la biomasa forestal aerea de dos bosques andinos en los departamentos de Santander y Cundinamarca. Ing. Forestal. CO., Universidad Distrital Francisco Jose de Caldas. 87 p. p. | |
| Acacia mangium | Asia | |  | | Krisnawati, H., W. C. Adinugroho and R. Imanuddin (2012). Monograph Allometric Models for Estimating Tree Biomass at Vrious Forest Ecosystem Types in Indonesia. Bogor, Indonesia, Research and Development Center for Conservation and Rehabilitation, Forestry Research and Development Agency, Ministry of Forestry. | |
| Quercus humboldtii | South America | |  | | Perez Lara, M; Diaz Timote, J. 2010. Estimacion del carbono contenido en la biomasa forestal aerea de dos bosques andinos en los departamentos de Santander y Cundinamarca. Ing. Forestal. CO., Universidad Distrital Francisco Jose de Caldas. 87 p. p. | |
| Compsoneura rigidifolia | South America | |  | | Perez Lara, M; Diaz Timote, J. 2010. Estimacion del carbono contenido en la biomasa forestal aerea de dos bosques andinos en los departamentos de Santander y Cundinamarca. Ing. Forestal. CO., Universidad Distrital Francisco Jose de Caldas. 87 p. p. | |
| Compsoneura rigidifolia | South America | |  | | Perez Lara, M; Diaz Timote, J. 2010. Estimacion del carbono contenido en la biomasa forestal aerea de dos bosques andinos en los departamentos de Santander y Cundinamarca. Ing. Forestal. CO., Universidad Distrital Francisco Jose de Caldas. 87 p. p. | |
| Eucalyptus annulata | Oceania | |  | | Jonson, J. H. and D. Freudenberger (2011). "Restore and sequester: Estimating biomass in native Australian woodland ecosystems for their carbon-funded restoration." Australian Journal of Botany 59(7): 639-652 | |
| Populus tremuloides | North America | |  | | Peterson; E; B; Chan; Y; H; Cragg; J; B; 1970; Aboveground standing crop; leaf area; and caloric value in an aspen clone near Calgary; Alberta; Canadian Journal of Botany; 48; 1459-1469; | |
| Picea mariana | North America | |  | | Singh; K; P; Misra; R; 1979; Structure and function of natural; modified; and silvicultural ecosystems in Uttar Pradesh; Varanasi; Final Tech Report (1975-1978) Man and the Biosphere (MAB) Research Project; | |
| Shorea spp | Asia | |  | | Basuki, T. M., P. E. van Laake, A. K. Skidmore and Y. A. Hussin (2009). "Allometric equations for estimating the above-ground biomass in tropical lowland Dipterocarp forests." Forest Ecology and Management 257(8): 1684-1694 | |
| Blakea granatensis | South America | |  | | Perez Lara, M; Diaz Timote, J. 2010. Estimacion del carbono contenido en la biomasa forestal aerea de dos bosques andinos en los departamentos de Santander y Cundinamarca. Ing. Forestal. CO., Universidad Distrital Francisco Jose de Caldas. 87 p. p. | |
| Pinus sylvestris | Europe | |  | | Makela, A. and Vanninen, P. 1998. Impacts of size and competition on tree form and distribution of aboveground biomass in Scots pine. Canadian Journal of Forest Research (28) 216-227 | |
| Eucalyptus ferdinandiana | Oceania | |  | | Williams, R. J., A. Zerihun, et al. (2005). "Allometry for estimating aboveground tree biomass in tropical and subtropical eucalypt woodlands: towards general predictive equations." Australian Journal of Botany 53(7): 607-619 | |
| Abies Nephrolepis | Asia | |  | | Wang, J., Zhang, C., et al. (2011). "Biomass Structure and Allometry of Abies nephrolepis (Maxim) in Northeast China." Silva Fennica 45(2): 211-226 | |
| Eucalyptus mannifera | Oceania | |  | | Bi, H., J. Turner, et al. (2004). "Additive biomass equations for native eucalypt forest trees of temperate Australia." Trees 18(4): 467-479 | |
| Abies Nephrolepis | Asia | |  | | Wang, J., Zhang, C., et al. (2011). "Biomass Structure and Allometry of Abies nephrolepis (Maxim) in Northeast China." Silva Fennica 45(2): 211-226 | |
| Abies Nephrolepis | Asia | |  | | Wang, J., Zhang, C., et al. (2011). "Biomass Structure and Allometry of Abies nephrolepis (Maxim) in Northeast China." Silva Fennica 45(2): 211-226 | |
| Betula papyrifera | North America | |  | | MacLean; D; A; Wein; R; W; 1976; Biomass of jack pine and mixed hardwood stands in northeastern New Brunswick; Canadian Journal of Forest Research; 6; 441-447; | |
| Ceriops spp | Asia | |  | | Nam pers. Comm., 2010 | |
| Eucalyptus camadulensis | Africa | |  | | Hailu, Z. 2002. Ecological impact evaluation of Eucalyptus plantations in comparison with agricultural and grazing land-use types in the Highlands of Ethiopia. Vienna University of Agricultural Sciences, Vienna. | |
| Leucaena leucocephala | Asia | |  | | Tandug, L. M. (1986). "Biomass prediction equations for giant ipil-ipil (Leucaena leucocephala (Lam.) de Wit)." Sylvatrop Philippine Forest Resources Journal 11(1 & 2): 1-22. | |
| Ailanthus excelsa | Asia | |  | | Pande, M.C.,Tandon, V.N. & Negi, M. 1988. Biomass production in plantation ecosystem of Ailanthus excelsa at five different ages in Uttar Pradesh. Indian Forester, 114(7): 362?371. | |
| General | Asia | |  | | Krisnawati, H., W. C. Adinugroho and R. Imanuddin (2012). Monograph Allometric Models for Estimating Tree Biomass at Vrious Forest Ecosystem Types in Indonesia. Bogor, Indonesia, Research and Development Center for Conservation and Rehabilitation, Forestry Research and Development Agency, Ministry of Forestry. | |
| General | South America | |  | | Gerwing, J. J. and Farias, D. L. 2000. Integrating Liana Abundance and Forest Stature into an Estimate of Total Aboveground Biomass for an Eastern Amazonian Forest. Journal of Tropical Ecology,(16): 327-335. | |
| Quercus castanea | North America | |  | | Aguilar, R., A. Ghilardi, E. Vega, M. Skutsch y K. Oyama. 2012. Sprouting productivity and allometric relationships of two oak species managed for traditional charcoal making in central Mexico. Biomass and Bioenergy 36: 192-207. | |
| Pinus banksiana | North America | |  | | Ker, M. 1980, Tree biomass equation for ten major species in Cumberland County, Nova Scotia. Inf. Rep. M-X-108; Fredericton, NS, Canadian Forestry Service, Maritime Forest Research Center | |
| Acer rubrum | North America | |  | | Ker, M. 1980, Tree biomass equation for ten major species in Cumberland County, Nova Scotia. Inf. Rep. M-X-108; Fredericton, NS, Canadian Forestry Service, Maritime Forest Research Center | |
| Abies balsamea | North America | |  | | Ker, M. 1980, Tree biomass equation for ten major species in Cumberland County, Nova Scotia. Inf. Rep. M-X-108; Fredericton, NS, Canadian Forestry Service, Maritime Forest Research Center | |
| Juniperus virginiana | North America | |  | | Schnell; R; 1976; Biomass estimates of eastern redcedar tree components; Tech; Note B15; Norris; TN; Tennessee Valley Authority; Division of Forestry; Fisheries and Wildlife Development; | |
| Scorodophloeus zenkeri | Africa | |  | | Kahindo T M., Dimandja L. J. P., Picard N. 2010. Volume equations and biomass estimates for three species in tropical moist forest in the Orientale province, Democratic Republic of Congo.Southern Forests.72:141-146 | |
| Gilbertiodendron dewevrei | Africa | |  | | Kahindo T M., Dimandja L. J. P., Picard N. 2010. Volume equations and biomass estimates for three species in tropical moist forest in the Orientale province, Democratic Republic of Congo.Southern Forests.72:141-146 | |
| Liriodendron tulipifera | North America | |  | | Martin; J; Kloeppel; B; Schaefer; T; Kimbler; D; McNulty; S; 1998; Aboveground biomass and nitrogen allocation of ten deciduous southern Appalachian tree species; Canadian Journal of Forest Research; 28; 1648-1659; | |
| Acacia mangium | Asia | |  | | Krisnawati, H., W. C. Adinugroho and R. Imanuddin (2012). Monograph Allometric Models for Estimating Tree Biomass at Vrious Forest Ecosystem Types in Indonesia. Bogor, Indonesia, Research and Development Center for Conservation and Rehabilitation, Forestry Research and Development Agency, Ministry of Forestry. | |
| General | Africa | |  | | Mugasha, W. A., Eid, T., BollandsÃ¥s, O. M., Malimbwi, R. E., Chamshama, S. A. O., Zahabu, E. and Katani, J. Z. 2013. Allometric models for prediction of above- and belowground biomass of trees in the miombo woodlands of Tanzania. Forest Ecology and Management 310: 87 â€“ 101. | |
| Pinus caribaea | North America | |  | | Arias D., Calvo-Alvarado J.,deB. Richter D., Dohrenbusch A. Productivity, aboveground biomass, nutrient uptake and carbon content in fast-growing Tree Plantations of native and introduced species in the Southern Region of Costa Rica. Biomass and Bioenergy 35: 1779-1788 | |
| Terminalia amazonia | North America | |  | | Arreaga Gramajo, W. 2002. Almacenamiento del carbono en bosques con manejo forestal sostenible en la Reserva de Biosfera Maya, Peten, Guatemala. Tesis Mag. Sc. Turrialba, CR., CATIE. 86 p. p. | |
| Melia azedarach | Asia | |  | | Toky,O.P.,Riddell-Black,D.,Harris,P.J.C.,Vasudevan,P. & Davies, P.A. 2011. Biomass production in short rotation effluent-irrigated plantations in North-West India. Journal of Scientific & Industrial Research, 70: 601?609. | |
| Ficus spp | Asia | |  | | Krisnawati, H., W. C. Adinugroho and R. Imanuddin (2012). Monograph Allometric Models for Estimating Tree Biomass at Vrious Forest Ecosystem Types in Indonesia. Bogor, Indonesia, Research and Development Center for Conservation and Rehabilitation, Forestry Research and Development Agency, Ministry of Forestry. | |
| Drimys granatensis | South America | |  | | Perez Lara, M; Diaz Timote, J. 2010. Estimacion del carbono contenido en la biomasa forestal aerea de dos bosques andinos en los departamentos de Santander y Cundinamarca. Ing. Forestal. CO., Universidad Distrital Francisco Jose de Caldas. 87 p. p. | |
| Tectona grandis | Asia | |  | | Krisnawati, H., W. C. Adinugroho and R. Imanuddin (2012). Monograph Allometric Models for Estimating Tree Biomass at Vrious Forest Ecosystem Types in Indonesia. Bogor, Indonesia, Research and Development Center for Conservation and Rehabilitation, Forestry Research and Development Agency, Ministry of Forestry. | |
| Acacia saligna | South America | |  | | Bratti R. M., Vita A, A. and Wrann H, J. 1998. Efecto De La Altura De Corte En El Rebrote De Acacia Saligna (Labill.) Wendl. Ciencia e Investigacion Forestal,(12): 39-50. | |
| Acacia nilotica | Asia | |  | | Raizada, A., Rao, M.S.R.M., Nambiar, K.T.N. & Padmaiah, M. 2007. Biomass production and prediction models for Acacia nilotica affected vertisols in Karnataka. Indian Forester, 133(1): 239?246. | |
| Liriodendron tulipifera | North America | |  | | Williams, R. A.; McClenahen, J. R. 1984. Biomass prediction equations for seedlings, sprouts, and saplings of ten central hardwood species. Forest Science. 30: 523-527. | |
| Vallea stipularis | South America | |  | | Perez Lara, M; Diaz Timote, J. 2010. Estimacion del carbono contenido en la biomasa forestal aerea de dos bosques andinos en los departamentos de Santander y Cundinamarca. Ing. Forestal. CO., Universidad Distrital Francisco Jose de Caldas. 87 p. p. | |
| Eucalyptus regnans | Oceania | |  | | Bi, H., J. Turner, et al. (2004). "Additive biomass equations for native eucalypt forest trees of temperate Australia." Trees 18(4): 467-479 | |
| Abies Nephrolepis | Asia | |  | | Wang, J., Zhang, C., et al. (2011). "Biomass Structure and Allometry of Abies nephrolepis (Maxim) in Northeast China." Silva Fennica 45(2): 211-226 | |
| Populus tremuloides | North America | |  | | Lieffers; V; Campbell; J; 1984; Biomass and growth of Populus tremuloides in northeastern Alberta; estimates using hierarchy in tree size; Canadian Journal of Forest Research; 14; 610-616; | |
| Eucalyptus camaldulensis | Asia | |  | | Ranasinghe, D.M.S.H.K. & Mayhead, G.J. 1991. Dry matter content and its distribution in an age series of Eucalyptus camaldulensis(Dehn.)plantations in Srilanka. Forest Ecology and Management, 41: 137?142. | |
| Corymbia intermedia | Oceania | |  | | Paul, K. I., S. H. Roxburgh, et al. (2013). "Development and testing of allometric equations for estimating above-ground biomass of mixed-species environmental plantings." Forest Ecology and Management 310(0): 483-494. | |
| Eucalyptus occidentalis | Oceania | |  | | Jonson, J. H. and D. Freudenberger (2011). "Restore and sequester: Estimating biomass in native Australian woodland ecosystems for their carbon-funded restoration." Australian Journal of Botany 59(7): 639-652 | |
| Liquidambar styraciflua | North America | |  | | RodrÃ­guez R., J. JimÃ©nez, O. Aguirre, E. TreviÃ±o y E. TreviÃ±o. 2006. EstimaciÃ³n de carbono almacenado de niebla en Tamaulipas, MÃ©xico. Ciencia UANL 9(2): 179-188. | |
| Eucalyptus camaldulensis | Asia | |  | | Mishra, H.C., Chandra, S.& Khanduja, C.P. 1994. Menagement of Forest Plantation Resources of Central Tarai Forest DivisionUsing Remote Sensing and GIS.75pp . | |
| Pinus devoniana | North America | |  | | MÃ©ndez, J., L. Luckie, M. CapÃ³ y J. NÃ¡jera. 2011. Ecuaciones alomÃ©tricas y estimaciÃ³n de incrementos en biomasa aÃ©rea y carbono en una plantaciÃ³n mixta de Pinus devoniana Lindl. y P. pseudostrobus Lindl., en Guanajuato, MÃ©xico. Agrociencia 45: 479-491. | |
| Nicotiana glauca | North America | |  | | RodrÃ­guez R., J. JimÃ©nez, J. Meza, O. Aguirre y R. Razo. 2008. Carbono contenido en un bosque tropical subcaducifolio en la reserva de la biosfera el cielo, Tamaulipas, MÃ©xico. Revista Latinoamericana de Recursos Naturales 4 (2):215 -222. | |
| Carapa guianensis | North America | |  | | Segura, M; Kanninen, M. 2005. Allometric Models for Tree Volume and Total Aboveground Biomass in a Tropical Humid Forest in Costa Rica1. Biotropica 37(1):2-8. | |
| Schima wallichii | Asia | |  | | Krisnawati, H., W. C. Adinugroho and R. Imanuddin (2012). Monograph Allometric Models for Estimating Tree Biomass at Vrious Forest Ecosystem Types in Indonesia. Bogor, Indonesia, Research and Development Center for Conservation and Rehabilitation, Forestry Research and Development Agency, Ministry of Forestry. | |
| Ceriops tagal | Africa | |  | | Kairo J. G., Bosire J., Langat J., Kirui B., Koedam N. 2009. Allometry and biomass distribution in replanted mangrove plantations at Gazi Bay, Kenya.Aquatic Conservation: Marine and Freshwater Ecosystems.19:63-69 | |
| Artocarpus hirsutus | Asia | |  | | Kumar, B.M., George, S.J., Jamaludheen, V. & Suresh, T.K. 1998. Comparison of biomass production , tree allometry and nutrient use efficiency of multipurpose trees grown in woodlot and silvopastoral experiments in Kerala , India. Forest Ecology and Management, 112: 145?163. | |
| General | Asia | |  | | Banaticla, M. R. N., R. F. Sales and R. D. Lasco (2007). "Biomass equations for tropical tree plantation species using secondary data from the Philippines." Annals of Tropical Research 29(3): 73-90. | |
| Acacia mellifera | Africa | |  | | de Klerk, J.N. 2002. Bush encroachment in Namibia. Report on Phase 1 of the Bush Encroachment Research. Monitoring and Management Project, Ministry of Environment and Tourism. | |
| Lophostemon sauaveolens | Oceania | |  | | Paul, K. I., S. H. Roxburgh, et al. (2013). "Development and testing of allometric equations for estimating above-ground biomass of mixed-species environmental plantings." Forest Ecology and Management 310(0): 483-494. | |
| Acacia salicina | Oceania | |  | | Paul, K. I., S. H. Roxburgh, et al. (2013). "Development and testing of allometric equations for estimating above-ground biomass of mixed-species environmental plantings." Forest Ecology and Management 310(0): 483-494. | |
| Leucaena leucocephala | Asia | |  | | Kumar, B.M., George, S.J., Jamaludheen, V. & Suresh, T.K. 1998. Comparison of biomass production , tree allometry and nutrient use efficiency of multipurpose trees grown in woodlot and silvopastoral experiments in Kerala , India. Forest Ecology and Management, 112: 145?163. | |
| Terminalia superba | Africa | |  | | Asomaning, G. 2006. Carbon estimation of teak (Tectona grandis) and socio-economic impact of reforestation on some Ghanaian rural communities. Kumasi, Ghana. | |
| Palaquium spp | Asia | |  | | Basuki, T. M., P. E. van Laake, A. K. Skidmore and Y. A. Hussin (2009). "Allometric equations for estimating the above-ground biomass in tropical lowland Dipterocarp forests." Forest Ecology and Management 257(8): 1684-1694 | |
| Intsia spp | Asia | |  | | Krisnawati, H., W. C. Adinugroho and R. Imanuddin (2012). Monograph Allometric Models for Estimating Tree Biomass at Vrious Forest Ecosystem Types in Indonesia. Bogor, Indonesia, Research and Development Center for Conservation and Rehabilitation, Forestry Research and Development Agency, Ministry of Forestry. | |
| Xylocarpus granatum | Asia | |  | | Krisnawati, H., W. C. Adinugroho and R. Imanuddin (2012). Monograph Allometric Models for Estimating Tree Biomass at Vrious Forest Ecosystem Types in Indonesia. Bogor, Indonesia, Research and Development Center for Conservation and Rehabilitation, Forestry Research and Development Agency, Ministry of Forestry. | |
| Quercus xalapensis | North America | |  | | RodrÃ­guez R., J. JimÃ©nez, O. Aguirre, E. TreviÃ±o y R. Razo. 2009. EstimaciÃ³n de carbono almacenado en el bosque de pino-encino en la Reserva de la Biosfera el Cielo, Tamaulipas, MÃ©xico. Ra Ximhai 5 (3): 317-327. | |
| Eucalyptus albida | Oceania | |  | | Paul, K. I., S. H. Roxburgh, et al. (2013). "Development and testing of allometric equations for estimating above-ground biomass of mixed-species environmental plantings." Forest Ecology and Management 310(0): 483-494. | |
| Avicennia marina | Africa | |  | | Kairo J. G., Bosire J., Langat J., Kirui B., Koedam N. 2009. Allometry and biomass distribution in replanted mangrove plantations at Gazi Bay, Kenya.Aquatic Conservation: Marine and Freshwater Ecosystems.19:63-69 | |
| Betula lenta | North America | |  | | Martin; J; Kloeppel; B; Schaefer; T; Kimbler; D; McNulty; S; 1998; Aboveground biomass and nitrogen allocation of ten deciduous southern Appalachian tree species; Canadian Journal of Forest Research; 28; 1648-1659; | |
| Cercocarpus ledifolius | North America | |  | | Chojnacky; D; Moisen; G; 1993; Converting wood volume to biomass for pinyon and juniper; Res; Note INT-411; Ogden; UT; U;S; Department of Agriculture; Forest Service; Intermountain Research Station; | |
| Endiandra microneura | Oceania | |  | | Liddell, M. J., N. Nieullet, et al. (2007). "Assessing the above-ground biomass of a complex tropical rainforest using a canopy crane." Austral Ecology 32(1): 43-58 | |
| Populus Davidiana Dode | Asia | |  | | Wang, C. (2006). "Biomass allometric equations for 10 co-occurring tree species in Chinese temperate forests." Forest Ecology and Management 222(1-3): 9-16 | |
| Melicope elleryana | Oceania | |  | | Paul, K. I., S. H. Roxburgh, et al. (2013). "Development and testing of allometric equations for estimating above-ground biomass of mixed-species environmental plantings." Forest Ecology and Management 310(0): 483-494. | |
| Eucalyptus captiosa | Oceania | |  | | Jonson, J. H. and D. Freudenberger (2011). "Restore and sequester: Estimating biomass in native Australian woodland ecosystems for their carbon-funded restoration." Australian Journal of Botany 59(7): 639-652 | |
| Abies Nephrolepis | Asia | |  | | Wang, J., Zhang, C., et al. (2011). "Biomass Structure and Allometry of Abies nephrolepis (Maxim) in Northeast China." Silva Fennica 45(2): 211-226 | |
| Acacia dealbata | Oceania | |  | | Bi, H., J. Turner, et al. (2004). "Additive biomass equations for native eucalypt forest trees of temperate Australia." Trees 18(4): 467-479 | |
| Picea rubens | North America | |  | | Freedman; B; 1984; The relationship between the aboveground dry weight and diameter for a wide size range of erect land plants; Canadian Journal of Botany; 62; 2370-2374; | |
| General | Africa | |  | | Djomo A. N., Ibrahima A., Saborowski J., Gravenhorst G., 2010. Allometric equations for biomass equations for biomass estimations in Cameroon and pan moist tropical equations including biomass data from Africa.Forest Ecology and Management.260:1863-1885 | |
| Cleistanthus myrianthus | Oceania | |  | | Liddell, M. J., N. Nieullet, et al. (2007). "Assessing the above-ground biomass of a complex tropical rainforest using a canopy crane." Austral Ecology 32(1): 43-58 | |
| Xanthostemon chrysanthus | Oceania | |  | | Paul, K. I., S. H. Roxburgh, et al. (2013). "Development and testing of allometric equations for estimating above-ground biomass of mixed-species environmental plantings." Forest Ecology and Management 310(0): 483-494. | |
| Olneya tesota | North America | |  | | Ramseur; G; S; Kelly; J; M; 1981; Forest characterization and biomass estimates for two sites on the Cumberland Plateau; Journal of the Tennessee Academy of Science; 56; 99-104; | |
| Bruguiera spp | Asia | |  | | Krisnawati, H., W. C. Adinugroho and R. Imanuddin (2012). Monograph Allometric Models for Estimating Tree Biomass at Vrious Forest Ecosystem Types in Indonesia. Bogor, Indonesia, Research and Development Center for Conservation and Rehabilitation, Forestry Research and Development Agency, Ministry of Forestry. | |
| Garcinia indica | Asia | |  | | Rai, S.N. 1984. Bark,Branches,Leaves,Stump and Trunk in tropical rain forests of western ghats,India. Indian Forester, 110(8):754-764. | |
| Populus deltoides | Asia | |  | | Negi, M.S. & Tandon, V.N. 1997. Biomass and nutrient distribution in the age sequence of Populas deltoides ecosystems in Haryana. Indian Forester, 123(2): 111?117. | |
| Pseudotsuga menziesii | North America | |  | | Barclay; H; Pang; P; Pollard; D; 1986; Aboveground biomass distribution within trees and stands in thinned and fertilized Douglas-fir; Canadian Journal of Forest Research; 16; 438-442; | |
| Terminalia amazonia | North America | |  | | Arreaga Gramajo, W. 2002. Almacenamiento del carbono en bosques con manejo forestal sostenible en la Reserva de Biosfera Maya, Peten, Guatemala. Tesis Mag. Sc. Turrialba, CR., CATIE. 86 p. p. | |
| Dendropanax arboreus | North America | |  | | RodrÃ­guez R., J. JimÃ©nez, J. Meza, O. Aguirre y R. Razo. 2008. Carbono contenido en un bosque tropical subcaducifolio en la reserva de la biosfera el cielo, Tamaulipas, MÃ©xico. Revista Latinoamericana de Recursos Naturales 4 (2):215 -222. | |
| Elmerrillia celebica | Asia | |  | | Krisnawati, H., W. C. Adinugroho and R. Imanuddin (2012). Monograph Allometric Models for Estimating Tree Biomass at Vrious Forest Ecosystem Types in Indonesia. Bogor, Indonesia, Research and Development Center for Conservation and Rehabilitation, Forestry Research and Development Agency, Ministry of Forestry. | |
| General | Asia | |  | | Krisnawati, H., W. C. Adinugroho and R. Imanuddin (2012). Monograph Allometric Models for Estimating Tree Biomass at Vrious Forest Ecosystem Types in Indonesia. Bogor, Indonesia, Research and Development Center for Conservation and Rehabilitation, Forestry Research and Development Agency, Ministry of Forestry. | |
| Jatropha mollissima | South America | |  | | Sampaio, EVSB; Silva, GC. 2005. Biomass equations for Brazilian semiarid caatinga plants. Acta Botanica Brasilica 19(4):935-943. | |
| Eucalyptus platypus | Oceania | |  | | Jonson, J. H. and D. Freudenberger (2011). "Restore and sequester: Estimating biomass in native Australian woodland ecosystems for their carbon-funded restoration." Australian Journal of Botany 59(7): 639-652 | |
| Eucalyptus cinerea | Oceania | |  | | Paul, K. I., S. H. Roxburgh, et al. (2013). "Development and testing of allometric equations for estimating above-ground biomass of mixed-species environmental plantings." Forest Ecology and Management 310(0): 483-494. | |
| Acacia dealbata | Oceania | |  | | Paul, K. I., S. H. Roxburgh, et al. (2013). "Development and testing of allometric equations for estimating above-ground biomass of mixed-species environmental plantings." Forest Ecology and Management 310(0): 483-494. | |
| Paraserianthes falcataria | Asia | |  | | Krisnawati, H., W. C. Adinugroho and R. Imanuddin (2012). Monograph Allometric Models for Estimating Tree Biomass at Vrious Forest Ecosystem Types in Indonesia. Bogor, Indonesia, Research and Development Center for Conservation and Rehabilitation, Forestry Research and Development Agency, Ministry of Forestry. | |
| Eucalyptus bleeseri | Oceania | |  | | O'Grady, A. P., X. Chen, et al. (2000). "Composition, leaf area index and standing biomass of eucalypt open forests near Darwin in the Northern Territory, Australia." Australian Journal of Botany 48(5): 629-638 | |
| Cratoxylum pruniflorum | Asia | |  | | Phuong, V.T., Xuan, N.X., Trieu, D.T., D., Trung, P.D., Giap, N.X., Thanh, P.N. (2012) Tree allometric equation development for estimation of forest above-ground biomass in Viet Nam -- Evergreen broadleaf, Deciduous, and Bamboo forests in the Central Highland region in (Eds) Inoguchi, A., Henry, M. Birigazzi, L. Sola, G. Tree allometric equation development for estimation of forest above-ground biomass in Viet Nam, UN-REDD Programme, Hanoi, Viet Nam | |
| Eucalyptus ovata | Oceania | |  | | Paul, K. I., S. H. Roxburgh, et al. (2013). "Development and testing of allometric equations for estimating above-ground biomass of mixed-species environmental plantings." Forest Ecology and Management 310(0): 483-494. | |
| Eucalyptus obliqua | Oceania | |  | | Paul, K. I., S. H. Roxburgh, et al. (2013). "Development and testing of allometric equations for estimating above-ground biomass of mixed-species environmental plantings." Forest Ecology and Management 310(0): 483-494. | |
| Berula Platyphylla Suk. | Asia | |  | | Wang, C. (2006). "Biomass allometric equations for 10 co-occurring tree species in Chinese temperate forests." Forest Ecology and Management 222(1-3): 9-16 | |
| Carapa guianensis | North America | |  | | Segura, M; Kanninen, M. 2005. Allometric Models for Tree Volume and Total Aboveground Biomass in a Tropical Humid Forest in Costa Rica1. Biotropica 37(1):2-8. | |
| Leucaena leucocephala | Asia | |  | | Tandug, L. M. (1986). "Biomass prediction equations for giant ipil-ipil (Leucaena leucocephala (Lam.) de Wit)." Sylvatrop Philippine Forest Resources Journal 11(1 & 2): 1-22. | |
| Wimmeria concolor | North America | |  | | RodrÃ­guez R., J. JimÃ©nez, O. Aguirre, E. TreviÃ±o y R. Razo. 2009. EstimaciÃ³n de carbono almacenado en el bosque de pino-encino en la Reserva de la Biosfera el Cielo, Tamaulipas, MÃ©xico. Ra Ximhai 5 (3): 317-327. | |
| Leucaena leucocephala | Asia | |  | | Tandug, L. M. (1986). "Biomass prediction equations for giant ipil-ipil (Leucaena leucocephala (Lam.) de Wit)." Sylvatrop Philippine Forest Resources Journal 11(1 & 2): 1-22. | |
| Artocarpus heterophyllus | Asia | |  | | Santos Martin, F., R. M. Navarro-Cerrillo, R. Mulia and M. Noordwijk (2010). "Allometric equations based on a fractal branching model for estimating aboveground biomass of four native tree species in the Philippines." Agroforestry Systems 78(3): 193-202. | |
| Acacia cochliacantha | North America | |  | | GÃ³mez, J. 2008. DeterminaciÃ³n de los almacenes de carbono en los compartimentos aÃ¨reo y subterrÃ neo de dos tios de vegetaciÃ³n en la reserva de la bÃ³sfera"Sierra de Huatla", Morelos, MÃ©xico. Tesis Doctoral . Colegio de Postgraduados. MÃ©xico. 194p. | |
| Pinus arizonica | North America | |  | | NÃ¡var, J. 2010. AlometrÃ­a para biomasa en especies arbÃ³reas del noroeste de MÃ©xico. Tropical and Subtropical Agroecosystems (12): 507-519. | |
| Coffea arabica | North America | |  | | Acosta, M. 2003. DiseÃ±o y aplicaciÃ³n de un mÃ©todo para medir los almacenes de carbono en sistemas con vegetaciÃ³n forestal y agricolas de ladera de MÃ©xico. Tesis de Doctorado. Colegio de Postgraduados. MÃ©xico. 135 p. | |
| Pinus arizonica | North America | |  | | NÃ¡var, J. 2010. AlometrÃ­a para biomasa en especies arbÃ³reas del noroeste de MÃ©xico. Tropical and Subtropical Agroecosystems (12): 507-519. | |
| Pinus cembroides | North America | |  | | Guerrero L. 2013. CuantificaciÃ³n de biomasa, carbono y producciÃ³n de oxÃ­geno de Pinus cembroides Zucc. en Mazapil, Zacatecas, MÃ©xico. Tesis Profesional. Universidad AutÃ³noma Agraria Antonio Narro. MÃ©xico. 33 p. | |
| Tectona grandis | Asia | |  | | Buvaneswaran, C., George, M., Perez, D.& Kanninen, M.2006. Notes Biomass of Teak plantations in Tamilogadu , India and Costa Rica compared. Journal of Tropical Forest Science, 18(3): 195?197. | |
| Eucalyptus globulus | Oceania | |  | | Paul, K. I., S. H. Roxburgh, et al. (2013). "Development and testing of allometric equations for estimating above-ground biomass of mixed-species environmental plantings." Forest Ecology and Management 310(0): 483-494. | |
| Terminalia amazonia | North America | |  | | Arreaga Gramajo, W. 2002. Almacenamiento del carbono en bosques con manejo forestal sostenible en la Reserva de Biosfera Maya, Peten, Guatemala. Tesis Mag. Sc. Turrialba, CR., CATIE. 86 p. p. | |
| Pinus sylvestris | Europe | |  | | Brakke, F.H. 1986. Distribution and yield of biomass from young Pinus sylvestris and Picea abies stands on draines and fertilized peatland. Scandinavian Journal of Forest Research (1) 49-66 | |
| Pinus sylvestris | Europe | |  | | Brakke, F.H. 1986. Distribution and yield of biomass from young Pinus sylvestris and Picea abies stands on draines and fertilized peatland. Scandinavian Journal of Forest Research (1) 49-66 | |
| Picea abies | Europe | |  | | Brakke, F.H. 1986. Distribution and yield of biomass from young Pinus sylvestris and Picea abies stands on draines and fertilized peatland. Scandinavian Journal of Forest Research (1) 49-66 | |
| Picea abies | Europe | |  | | Brakke, F.H. 1986. Distribution and yield of biomass from young Pinus sylvestris and Picea abies stands on draines and fertilized peatland. Scandinavian Journal of Forest Research (1) 49-66 | |
| Sterigmapetalum tachirensis | South America | |  | | Perez Lara, M; Diaz Timote, J. 2010. Estimacion del carbono contenido en la biomasa forestal aerea de dos bosques andinos en los departamentos de Santander y Cundinamarca. Ing. Forestal. CO., Universidad Distrital Francisco Jose de Caldas. 87 p. p. | |
| Hesperomeles goudotiana | South America | |  | | Perez Lara, M; Diaz Timote, J. 2010. Estimacion del carbono contenido en la biomasa forestal aerea de dos bosques andinos en los departamentos de Santander y Cundinamarca. Ing. Forestal. CO., Universidad Distrital Francisco Jose de Caldas. 87 p. p. | |
| Pinus merkusii | Asia | |  | | Krisnawati, H., W. C. Adinugroho and R. Imanuddin (2012). Monograph Allometric Models for Estimating Tree Biomass at Vrious Forest Ecosystem Types in Indonesia. Bogor, Indonesia, Research and Development Center for Conservation and Rehabilitation, Forestry Research and Development Agency, Ministry of Forestry. | |
| Acacia mangium | Asia | |  | | Tsai, L. M. (1986). "Biomass and productivity of 4.5 year-old Acacia mangium in Sarawak." Pertanika 9(1): 81-87. | |
| Leucaena leucocephala | Asia | |  | | Banaticla, M. R. N., R. F. Sales and R. D. Lasco (2007). "Biomass equations for tropical tree plantation species using secondary data from the Philippines." Annals of Tropical Research 29(3): 73-90. | |
| Licania minutiflora | South America | |  | | Salis, S. M., Assis, M. A., Mattos, P. P. and Piao, A. C. S. 2006. Estimating the Aboveground Biomass and Wood Volume of Savanna Woodlands in Brazils Pantanal Wetlands Based on Allometric Correlations. Forest Ecology and Management,(228): 61-68. | |
| Leucaena leucocephala | Asia | |  | | Tandug, L. M. (1986). "Biomass prediction equations for giant ipil-ipil (Leucaena leucocephala (Lam.) de Wit)." Sylvatrop Philippine Forest Resources Journal 11(1 & 2): 1-22. | |
| Alstonia scholaris | Asia | |  | | Toky,O.P.,Riddell-Black,D.,Harris,P.J.C.,Vasudevan,P. & Davies, P.A. 2011. Biomass production in short rotation effluent-irrigated plantations in North-West India. Journal of Scientific & Industrial Research, 70: 601?609. | |
| Oxydendrum arboreum | North America | |  | | Martin; J; Kloeppel; B; Schaefer; T; Kimbler; D; McNulty; S; 1998; Aboveground biomass and nitrogen allocation of ten deciduous southern Appalachian tree species; Canadian Journal of Forest Research; 28; 1648-1659; | |
| Eucalyptus papuana | Oceania | |  | | Werner, P. A. and P. G. Murphy (2001). "Size-specific biomass allocation and water content of above- and below-ground components of three <i>Eucalyptus</i> species in a northern Australian savanna." Australian Journal of Botany 49(2): 155-167 | |
| Clethra fimbriata | South America | |  | | Perez Lara, M; Diaz Timote, J. 2010. Estimacion del carbono contenido en la biomasa forestal aerea de dos bosques andinos en los departamentos de Santander y Cundinamarca. Ing. Forestal. CO., Universidad Distrital Francisco Jose de Caldas. 87 p. p. | |
| Quercus rubra | North America | |  | | Perala; D; A; Alban; D; H; 1994; Allometric biomass estimators for aspen-dominated ecosystems in the upper Great Lakes; Res; Pap; NC-314; St; Paul; MN; U;S; Department of Agriculture; Forest Service; North Central Forest Experiment Station; | |
| Acacia dispparrrima | Oceania | |  | | Paul, K. I., S. H. Roxburgh, et al. (2013). "Development and testing of allometric equations for estimating above-ground biomass of mixed-species environmental plantings." Forest Ecology and Management 310(0): 483-494. | |
| Populus Davidiana Dode | Asia | |  | | Wang, C. (2006). "Biomass allometric equations for 10 co-occurring tree species in Chinese temperate forests." Forest Ecology and Management 222(1-3): 9-16 | |
| Pinus spp | North America | |  | | NÃ¡var, J. 2009. Allometric equations for tree species and carbon stocks for forests of northwestern Mexico.Forest Ecology and Management 257:427-434 | |
| Hevea brasiliensis | North America | |  | | Monroy C. y J. NÃ¡var. 2004. Ecuaciones de aditividad para estimar componentes de biomasa de hevea brasiliensis Muell. Arg., en Veracruz, MÃ©xico. Madera y Bosques 10(2): 29-43. | |
| Bursera penicillata | North America | |  | | NÃ¡var, J. 2009. Allometric equations for tree species and carbon stocks for forests of northwestern Mexico.Forest Ecology and Management 257:427-434 | |
| Pinus durangensis | North America | |  | | NÃ¡var, J. 2010. AlometrÃ­a para biomasa en especies arbÃ³reas del noroeste de MÃ©xico. Tropical and Subtropical Agroecosystems (12): 507-519. | |
| Pinus durangensis | North America | |  | | NÃ¡var, J. 2010. AlometrÃ­a para biomasa en especies arbÃ³reas del noroeste de MÃ©xico. Tropical and Subtropical Agroecosystems (12): 507-519. | |
| Pinus arizonica var. ornelasii | North America | |  | | NÃ¡var, J. 2010. AlometrÃ­a para biomasa en especies arbÃ³reas del noroeste de MÃ©xico. Tropical and Subtropical Agroecosystems (12): 507-519. | |
| Clethra spp | North America | |  | | Acosta, M., J. Vargas, A. VelÃ¡zquez y J. Etchevers. 2002. EstimaciÃ³n de la biomasa aÃ©rea mediante el uso de relaciones alomÃ©tricas en seis especies arbÃ³reas en Oaxaca, MÃ©xico. Agrociencia 36(6): 725-736. | |
| Clethra hartwegii | North America | |  | | Acosta, M., J. Vargas, A. VelÃ¡zquez y J. Etchevers. 2002. EstimaciÃ³n de la biomasa aÃ©rea mediante el uso de relaciones alomÃ©tricas en seis especies arbÃ³reas en Oaxaca, MÃ©xico. Agrociencia 36(6): 725-736. | |
| Rapanea spp | North America | |  | | Acosta, M., J. Vargas, A. VelÃ¡zquez y J. Etchevers. 2002. EstimaciÃ³n de la biomasa aÃ©rea mediante el uso de relaciones alomÃ©tricas en seis especies arbÃ³reas en Oaxaca, MÃ©xico. Agrociencia 36(6): 725-736. | |
| Gironniera subaequalis | Asia | |  | | Lv, X., Tang, J., et al. (2007). "Biomass and its allocation in tropical seasonal rainforest in Xishuangbanna, Southwest China." Journal of Plant Ecology 31(1): 11-22 | |
| Pinus merkusii | Asia | |  | | Krisnawati, H., W. C. Adinugroho and R. Imanuddin (2012). Monograph Allometric Models for Estimating Tree Biomass at Vrious Forest Ecosystem Types in Indonesia. Bogor, Indonesia, Research and Development Center for Conservation and Rehabilitation, Forestry Research and Development Agency, Ministry of Forestry. | |
| Vallea stipularis | South America | |  | | Perez Lara, M; Diaz Timote, J. 2010. Estimacion del carbono contenido en la biomasa forestal aerea de dos bosques andinos en los departamentos de Santander y Cundinamarca. Ing. Forestal. CO., Universidad Distrital Francisco Jose de Caldas. 87 p. p. | |
| General | Africa | |  | | Williams, M., Ryan, C.M., Rees, R.M., Sambane, E., Fernando, J. and Grace, J. 2008. Carbon sequestration and biodiversity of re-growing miombo woodlands in Mozambique. Forest Ecology and Management 254: 145-155. | |
| Pinus pseudostrobus | North America | |  | | DomÃ­nguez, G., O. Aguirre, J. JimÃ©nez,R. RodrÃ­guezy J. DÃ­az. 2009. Biomasa aÃ©rea y factores de expansiÃ³n de especies arbÃ³reas en bosques del sur de Nuevo LeÃ³n. Revista Chapingo Serie Ciencias Forestales y del Ambiente 15(1): 59-64. | |
| Gardenia Jasminoides | Asia | |  | | Zeng, H., Liu, Q., et al. (2009). "Biomass equations for four shrub species in subtropical China." Journal of Forest Research 15(2): 83-90 | |
| Shorea parvifolia | Asia | |  | | Krisnawati, H., W. C. Adinugroho and R. Imanuddin (2012). Monograph Allometric Models for Estimating Tree Biomass at Vrious Forest Ecosystem Types in Indonesia. Bogor, Indonesia, Research and Development Center for Conservation and Rehabilitation, Forestry Research and Development Agency, Ministry of Forestry. | |
| Quercus sartorii | North America | |  | | RodrÃ­guez R., J. JimÃ©nez, O. Aguirre, E. TreviÃ±o y E. TreviÃ±o. 2006. EstimaciÃ³n de carbono almacenado de niebla en Tamaulipas, MÃ©xico. Ciencia UANL 9(2): 179-188. | |
| Ocotea tampicensis | North America | |  | | RodrÃ­guez R., J. JimÃ©nez, J. Meza, O. Aguirre y R. Razo. 2008. Carbono contenido en un bosque tropical subcaducifolio en la reserva de la biosfera el cielo, Tamaulipas, MÃ©xico. Revista Latinoamericana de Recursos Naturales 4 (2):215 -222. | |
| Casimiroa greggii | North America | |  | | RodrÃ­guez R., J. JimÃ©nez, J. Meza, O. Aguirre y R. Razo. 2008. Carbono contenido en un bosque tropical subcaducifolio en la reserva de la biosfera el cielo, Tamaulipas, MÃ©xico. Revista Latinoamericana de Recursos Naturales 4 (2):215 -222. | |
| Vatairea paraensis | South America | |  | | Overman, JPM; Witte, HJL; Saldarriaga, JG. 1994. Evaluation of regression models for above-ground biomass determination in Amazon Rainforest. Journal of Tropical Ecology 10(2). | |
| Dalbergia sissoo | Asia | |  | | Rai, A.P., Singh, U.P. & Jabeen, N. 2010. Statistical models for prediction of growth and yield of Dalbergia sisoo and Hardwickia binnata under silvipastoral system in India. Indian Journal of Forestry, 33(1): 13?20. | |
| Elaeocarpus angustifolius | Oceania | |  | | Paul, K. I., S. H. Roxburgh, et al. (2013). "Development and testing of allometric equations for estimating above-ground biomass of mixed-species environmental plantings." Forest Ecology and Management 310(0): 483-494. | |
| Myrsine dependens | South America | |  | | Perez Lara, M; Diaz Timote, J. 2010. Estimacion del carbono contenido en la biomasa forestal aerea de dos bosques andinos en los departamentos de Santander y Cundinamarca. Ing. Forestal. CO., Universidad Distrital Francisco Jose de Caldas. 87 p. p. | |
| Eucalyptus robusta | North America | |  | | Schubert; T; Strand; R; Cole; T; McDuffie; K; 1988; Equations for predicting biomass of six introduced subtropical tree species; Island of Hawaii; Res; Note PSW-401; Albany; CA; U;S; Department of Agriculture; Forest Service; Pacific Southwest Forest | |
| Avicennia spp | Asia | |  | | Nam pers. Comm., 2010 | |
| Eucalyptus globulus | Africa | |  | | Hailu, Z. 2002. Ecological impact evaluation of Eucalyptus plantations in comparison with agricultural and grazing land-use types in the Highlands of Ethiopia. Vienna University of Agricultural Sciences, Vienna. | |
| Eucalyptus viminalis | Oceania | |  | | Paul, K. I., S. H. Roxburgh, et al. (2013). "Development and testing of allometric equations for estimating above-ground biomass of mixed-species environmental plantings." Forest Ecology and Management 310(0): 483-494. | |
| Acer saccharum | North America | |  | | Chapman; J; Gower; S; 1991; Aboveground production and canopy dynamics in sugar maple and red oak trees in southwestern Wisconsin; Canadian Journal of Forest Research; 21; 1533-1543; | |
| Acer rubrum | North America | |  | | Freedman; B; 1984; The relationship between the aboveground dry weight and diameter for a wide size range of erect land plants; Canadian Journal of Botany; 62; 2370-2374; | |
| Eucalyptus crenulata | Oceania | |  | | Paul, K. I., S. H. Roxburgh, et al. (2013). "Development and testing of allometric equations for estimating above-ground biomass of mixed-species environmental plantings." Forest Ecology and Management 310(0): 483-494. | |
| Olneya tesota | North America | |  | | Monk; C; Child; G; Nicholson; S; 1970; Biomass; litter and leaf surface area estimates of an oak-hickory forest; Oikos; 21; 138-141; | |
| Liquidambar styraciflua | North America | |  | | Lefsky, M., D. harding, W. B. Cohen, G. Parker y h. Shugart. 1999. Surface lidar remote sensing of basal area and biomass in deciduous forests of Eastern Maryland, USA. Remote Sensing of Environment 67:83-98. (67) 83-98 | |
| Loropetalum Chinense | Asia | |  | | Zeng, H., Liu, Q., et al. (2009). "Biomass equations for four shrub species in subtropical China." Journal of Forest Research 15(2): 83-90 | |
| Eucalyptus blakelyi | Oceania | |  | | Paul, K. I., S. H. Roxburgh, et al. (2013). "Development and testing of allometric equations for estimating above-ground biomass of mixed-species environmental plantings." Forest Ecology and Management 310(0): 483-494. | |
| Pinus radiata | Europe | |  | | Menguzzato, G. 1988. Modelli di previsione del peso fresco, della biomassa e del volume per pino insigne ed eucalitti nell'Azienda Massanova (Salerno). Ann. Ist. Sper. Selvicoltura (19) 323-354 | |
| Pinus patula | North America | |  | | DÃ­az, R. 2005. DeterminaciÃ³n de ecuaciones alomÃ©tricas para estimar biomasa y carbono en el estrato aÃ©reo en bosques de Pinus patula Schl. Cham. en Tlaxcala MÃ©xico. Tesis Profesional. Universidad Nacional AutÃ³noma Chapingo. MÃ©xico. 50 p. | |
| Protium heptaphyllum | South America | |  | | Salis, S. M., Assis, M. A., Mattos, P. P. and Piao, A. C. S. 2006. Estimating the Aboveground Biomass and Wood Volume of Savanna Woodlands in Brazils Pantanal Wetlands Based on Allometric Correlations. Forest Ecology and Management,(228): 61-68. | |
| Aniba cinnamomiflora | South America | |  | | Perez Lara, M; Diaz Timote, J. 2010. Estimacion del carbono contenido en la biomasa forestal aerea de dos bosques andinos en los departamentos de Santander y Cundinamarca. Ing. Forestal. CO., Universidad Distrital Francisco Jose de Caldas. 87 p. p. | |
| Juniperus flaccida | North America | |  | | RodrÃ­guez, R., J. JÃ­menez, O. Aguirre y E. Jurado. 2007. Ecuaciones alomÃ©tricas para estimar biomasa aÃ©rea en especies de encino y pino en Iturbide,N.L. Ciencia Forestal en MÃ©xico 32(1): 39-56. | |
| Quercus laceyi | North America | |  | | RodrÃ­guez, R., J. JÃ­menez, O. Aguirre y E. Jurado. 2007. Ecuaciones alomÃ©tricas para estimar biomasa aÃ©rea en especies de encino y pino en Iturbide,N.L. Ciencia Forestal en MÃ©xico 32(1): 39-56. | |
| Ochroma pyramidale | North America | |  | | Douterlungne, D. 2013. Ãrboles de rÃ¡pido crecimiento para la restauraciÃ³n ecolÃ³gica y la captura de carbono en el trÃ³pico hÃºmedo de MÃ©xico. Tesis de Doctorado. El Colegio de la Frontera Sur. MÃ©xico. 83 p. | |
| Pinus durangensis | North America | |  | | NÃ¡var, J. 2010. AlometrÃ­a para biomasa en especies arbÃ³reas del noroeste de MÃ©xico. Tropical and Subtropical Agroecosystems (12): 507-519. | |
| Quercus sideroxyla | North America | |  | | NÃ¡var, J. 2010. AlometrÃ­a para biomasa en especies arbÃ³reas del noroeste de MÃ©xico. Tropical and Subtropical Agroecosystems (12): 507-519. | |
| Pinus pseudostrobus | North America | |  | | NÃ¡var, J. 2010. AlometrÃ­a para biomasa en especies arbÃ³reas del noroeste de MÃ©xico. Tropical and Subtropical Agroecosystems (12): 507-519. | |
| Quercus spp | North America | |  | | NÃ¡var, J. 2010. AlometrÃ­a para biomasa en especies arbÃ³reas del noroeste de MÃ©xico. Tropical and Subtropical Agroecosystems (12): 507-519. | |
| Prunus persica | North America | |  | | Acosta, M. 2003. DiseÃ±o y aplicaciÃ³n de un mÃ©todo para medir los almacenes de carbono en sistemas con vegetaciÃ³n forestal y agricolas de ladera de MÃ©xico. Tesis de Doctorado. Colegio de Postgraduados. MÃ©xico. 135 p. | |
| Quercus laceyi | North America | |  | | RodrÃ­guez, R., J. JÃ­menez, O. Aguirre y E. Jurado. 2007. Ecuaciones alomÃ©tricas para estimar biomasa aÃ©rea en especies de encino y pino en Iturbide,N.L. Ciencia Forestal en MÃ©xico 32(1): 39-56. | |
| Psidium guajava | North America | |  | | Meraz, J., F. Rojas-GarcÃ­a, J. Galarza, J. Torres, J. Luna , A. Ponce y J. Romo. 2013. UtilizaciÃ³n de ecuaciones alomÃ©tricas para la estimaciÃ³n de biomasa y carbono en huertos de guayabo. Memorias IV Congreso Mexicano de EcologÃ­a. Villahermosa, Tabasco. pp. 223. | |
| Avicennia marina | Asia | |  | | Krisnawati, H., W. C. Adinugroho and R. Imanuddin (2012). Monograph Allometric Models for Estimating Tree Biomass at Vrious Forest Ecosystem Types in Indonesia. Bogor, Indonesia, Research and Development Center for Conservation and Rehabilitation, Forestry Research and Development Agency, Ministry of Forestry. | |
| Acacia nilotica | Asia | |  | | Tandon, V.N., Pande, M.C., Rai, L. & Rawat, H.S. 1988. Biomass production and its distribution by Acacia nilotica plantations at five different ages in Hariyana. Indian Forester, 114(11): 770?775. | |
| Zanthoxylum riedelianum | North America | |  | | Manzano, F. 2010. Crecimiento, periodicidad y biomasa de Zanthoxylum kellermanii P. Wilson en una selva perennifolia del norte de Oaxaca. Tesis de Doctorado. Colegio de Postgraduados. MÃ©xico. 85 p. | |
| General | Asia | |  | | Banaticla, M. R. N., R. F. Sales and R. D. Lasco (2007). "Biomass equations for tropical tree plantation species using secondary data from the Philippines." Annals of Tropical Research 29(3): 73-90. | |
| Eucalyptus porosa | Oceania | |  | | Paul, K. I., S. H. Roxburgh, et al. (2013). "Development and testing of allometric equations for estimating above-ground biomass of mixed-species environmental plantings." Forest Ecology and Management 310(0): 483-494. | |
| Coffea spp | Asia | |  | | Krisnawati, H., W. C. Adinugroho and R. Imanuddin (2012). Monograph Allometric Models for Estimating Tree Biomass at Vrious Forest Ecosystem Types in Indonesia. Bogor, Indonesia, Research and Development Center for Conservation and Rehabilitation, Forestry Research and Development Agency, Ministry of Forestry. | |
| Pinus banksiana | North America | |  | | Hegyi; F; 1972; Dry matter distribution in jack pine stands in northern Ontario; Forestry Chronicle; 48; 193-197; | |
| Pinus sylvestris | Europe | |  | | Oleksyn, J., Reich, P.B., Chalupka, W. and Tjoelker, M.G. 1999. Differential above- and below-ground biomass accumulation of European Pinus sylvestris populations in a 12-year-old provenance experiment. Scandinavian Journal of Forest Research (14) 1-17 | |
| Quercus gambelii | North America | |  | | Chojnacky; D; 1984; Volume and biomass for curlleaf cercocarpus in Nevada; Res; Pap; INT-332; Ogden; UT; U;S; Department of Agriculture; Forest Service; Intermountain Forest and Range Experiment Station; | |
| Pseudotsuga menziesii | Europe | |  | | Menguzzato, G. 1988. Modelli di previsione del peso fresco, della biomassa e del volume per pino insigne ed eucalitti nell'Azienda Massanova (Salerno). Ann. Ist. Sper. Selvicoltura (19) 323-354 | |
| Quercus xalapensis | North America | |  | | RodrÃ­guez R., J. JimÃ©nez, O. Aguirre, E. TreviÃ±o y E. TreviÃ±o. 2006. EstimaciÃ³n de carbono almacenado de niebla en Tamaulipas, MÃ©xico. Ciencia UANL 9(2): 179-188. | |
| Picea rubens | North America | |  | | Siccama; T; G; Hamburg; S; P; Arthur; M; A; Yanai; R; D; Bormann; F; H; Likens; G; E; 1994; Corrections to allometric equations and plant tissue chemistry for Hubbard Brook Experimental Forest; Ecology; 75; 246-248; | |
| Ceanothus caeruleus | North America | |  | | RodrÃ­guez R., J. JimÃ©nez, J. Meza, O. Aguirre y R. Razo. 2008. Carbono contenido en un bosque tropical subcaducifolio en la reserva de la biosfera el cielo, Tamaulipas, MÃ©xico. Revista Latinoamericana de Recursos Naturales 4 (2):215 -222. | |
| Pinus pseudostrobus | North America | |  | | RodrÃ­guez, R., J. JÃ­menez, O. Aguirre y E. Jurado. 2007. Ecuaciones alomÃ©tricas para estimar biomasa aÃ©rea en especies de encino y pino en Iturbide,N.L. Ciencia Forestal en MÃ©xico 32(1): 39-56. | |
| Pinus teocote | North America | |  | | NÃ¡var, J. 2010. AlometrÃ­a para biomasa en especies arbÃ³reas del noroeste de MÃ©xico. Tropical and Subtropical Agroecosystems (12): 507-519. | |
| Pinus spp | North America | |  | | NÃ¡var, J. 2010. AlometrÃ­a para biomasa en especies arbÃ³reas del noroeste de MÃ©xico. Tropical and Subtropical Agroecosystems (12): 507-519. | |
| Hevea brasiliensis | North America | |  | | Rojo, G., J. Jasso, J. Vargas, D. Palma y A. VelÃ¡zquez. 2005. Biomasa aÃ©rea en plantaciones comerciales de hule (hevea brasiliensis MÃ¼ll. Arg.) en el estado de Oaxaca, MÃ©xico. Agrociencia 39: 449-456. | |
| Pinus ayacahuite | North America | |  | | NÃ¡var, J. 2010. AlometrÃ­a para biomasa en especies arbÃ³reas del noroeste de MÃ©xico. Tropical and Subtropical Agroecosystems (12): 507-519. | |
| Euphorbia schlechtendalii | North America | |  | | GÃ³mez, J. 2008. DeterminaciÃ³n de los almacenes de carbono en los compartimentos aÃ¨reo y subterrÃ neo de dos tios de vegetaciÃ³n en la reserva de la bÃ³sfera"Sierra de Huatla", Morelos, MÃ©xico. Tesis Doctoral . Colegio de Postgraduados. MÃ©xico. 194p. | |
| Pinus leiophylla | North America | |  | | NÃ¡var, J. 2010. AlometrÃ­a para biomasa en especies arbÃ³reas del noroeste de MÃ©xico. Tropical and Subtropical Agroecosystems (12): 507-519. | |
| Pinus oocarpa | North America | |  | | NÃ¡var, J. 2010. AlometrÃ­a para biomasa en especies arbÃ³reas del noroeste de MÃ©xico. Tropical and Subtropical Agroecosystems (12): 507-519. | |
| Terminalia amazonia | North America | |  | | Arreaga Gramajo, W. 2002. Almacenamiento del carbono en bosques con manejo forestal sostenible en la Reserva de Biosfera Maya, Peten, Guatemala. Tesis Mag. Sc. Turrialba, CR., CATIE. 86 p. p. | |
| Garcinia cambogia | Asia | |  | | Rai, S.N. 1984. Bark,Branches,Leaves,Stump and Trunk in tropical rain forests of western ghats,India. Indian Forester, 110(8):754-764. | |
| Eucalyptus bridgesiana | Oceania | |  | | Paul, K. I., S. H. Roxburgh, et al. (2013). "Development and testing of allometric equations for estimating above-ground biomass of mixed-species environmental plantings." Forest Ecology and Management 310(0): 483-494. | |
| General | Africa | |  | | Henry, M., Besnard, A., Asante, W.A., Eshun, J., Adu-Bredu, S., Valentini, R., Bernoux, M. and Saint-Andre, L. 2010. Wood density, phytomass variations within and among trees, and allometric equations in a tropical rainforest of Africa. Forest Ecology and Management 260: 1375-1388. | |
| Cotylelobium burckii | Asia | |  | | Krisnawati, H., W. C. Adinugroho and R. Imanuddin (2012). Monograph Allometric Models for Estimating Tree Biomass at Vrious Forest Ecosystem Types in Indonesia. Bogor, Indonesia, Research and Development Center for Conservation and Rehabilitation, Forestry Research and Development Agency, Ministry of Forestry. | |
| Shorea leprosula | Asia | |  | | Krisnawati, H., W. C. Adinugroho and R. Imanuddin (2012). Monograph Allometric Models for Estimating Tree Biomass at Vrious Forest Ecosystem Types in Indonesia. Bogor, Indonesia, Research and Development Center for Conservation and Rehabilitation, Forestry Research and Development Agency, Ministry of Forestry. | |
| Inga spp | North America | |  | | Segura, M., M. Kanninen y D. SuÃ¡rez. 2006. Allometric models for estimating aboveground biomass of shade trees and coffee bushes grown together. Agroforest Syst 68:143-150. | |
| Eucalyptus camadulensis | Africa | |  | | Hailu, Z. 2002. Ecological impact evaluation of Eucalyptus plantations in comparison with agricultural and grazing land-use types in the Highlands of Ethiopia. Vienna University of Agricultural Sciences, Vienna. | |
| Eucalyptus loxophleba | Oceania | |  | | Paul, K. I., S. H. Roxburgh, et al. (2013). "Development and testing of allometric equations for estimating above-ground biomass of mixed-species environmental plantings." Forest Ecology and Management 310(0): 483-494. | |
| Dalbergia sissoo | Asia | |  | | Tyagi, K., Sharma, S.D. & Tyagi, P. 2009. Development of biomass and productivity in age series of Dalbegia sisoo plantations in sodic lands of Uttar pradesh. Annals of Forestry, 17(2): 219?233. | |
| Eucalyptus kitsoniana | Oceania | |  | | Paul, K. I., S. H. Roxburgh, et al. (2013). "Development and testing of allometric equations for estimating above-ground biomass of mixed-species environmental plantings." Forest Ecology and Management 310(0): 483-494. | |
| Ulmus americana | North America | |  | | Perala; D; A; Alban; D; H; 1994; Allometric biomass estimators for aspen-dominated ecosystems in the upper Great Lakes; Res; Pap; NC-314; St; Paul; MN; U;S; Department of Agriculture; Forest Service; North Central Forest Experiment Station; | |
| Betula alleghaniensis | North America | |  | | Perala; D; A; Alban; D; H; 1994; Allometric biomass estimators for aspen-dominated ecosystems in the upper Great Lakes; Res; Pap; NC-314; St; Paul; MN; U;S; Department of Agriculture; Forest Service; North Central Forest Experiment Station; | |
| Thuja occidentalis | North America | |  | | Perala; D; A; Alban; D; H; 1994; Allometric biomass estimators for aspen-dominated ecosystems in the upper Great Lakes; Res; Pap; NC-314; St; Paul; MN; U;S; Department of Agriculture; Forest Service; North Central Forest Experiment Station; | |
| Eucalyptus gardneri | Oceania | |  | | Paul, K. I., S. H. Roxburgh, et al. (2013). "Development and testing of allometric equations for estimating above-ground biomass of mixed-species environmental plantings." Forest Ecology and Management 310(0): 483-494. | |
| Eucalyptus grandis | Asia | |  | | Krisnawati, H., W. C. Adinugroho and R. Imanuddin (2012). Monograph Allometric Models for Estimating Tree Biomass at Vrious Forest Ecosystem Types in Indonesia. Bogor, Indonesia, Research and Development Center for Conservation and Rehabilitation, Forestry Research and Development Agency, Ministry of Forestry. | |
| Schima wallichii | Asia | |  | | Krisnawati, H., W. C. Adinugroho and R. Imanuddin (2012). Monograph Allometric Models for Estimating Tree Biomass at Vrious Forest Ecosystem Types in Indonesia. Bogor, Indonesia, Research and Development Center for Conservation and Rehabilitation, Forestry Research and Development Agency, Ministry of Forestry. | |
| Populus tremuloides | North America | |  | | Freedman; B; 1984; The relationship between the aboveground dry weight and diameter for a wide size range of erect land plants; Canadian Journal of Botany; 62; 2370-2374; | |
| Acacia auriculiformis | Asia | |  | | Kumar, B.M., George, S.J., Jamaludheen, V. & Suresh, T.K. 1998. Comparison of biomass production , tree allometry and nutrient use efficiency of multipurpose trees grown in woodlot and silvopastoral experiments in Kerala , India. Forest Ecology and Management, 112: 145?163. | |
| Diptychandra aurantiaca | South America | |  | | Salis, S. M., Assis, M. A., Mattos, P. P. and Piao, A. C. S. 2006. Estimating the Aboveground Biomass and Wood Volume of Savanna Woodlands in Brazils Pantanal Wetlands Based on Allometric Correlations. Forest Ecology and Management,(228): 61-68. | |
| Bambusa vulgaris | Asia | |  | | Nath, A.J., Das, G. & Das, A.K. 2009. Above ground standing biomass and carbon storage in village bamboos in North East India. Biomass and Bioenergy, 33(9): 1188?1196. | |
| Eucalyptus tetrodonta | Oceania | |  | | O'Grady, A. P., X. Chen, et al. (2000). "Composition, leaf area index and standing biomass of eucalypt open forests near Darwin in the Northern Territory, Australia." Australian Journal of Botany 48(5): 629-638 | |
| Vitellaria paradoxa | Africa | |  | | Peltier, R., Njiti, C.F., Ntoupka, M., Manlay, R., Henry, M. and Morillon, V. 2007. Evaluation du stock de carbone et de la productivite en bois d'un parc a Karites du Nord-Cameroun. Bois et foret des tropiques 294: 39-50. | |
| Eucalyptus porrecta | Oceania | |  | | O'Grady, A. P., X. Chen, et al. (2000). "Composition, leaf area index and standing biomass of eucalypt open forests near Darwin in the Northern Territory, Australia." Australian Journal of Botany 48(5): 629-638 | |
| Eucalyptus bleeseri | Oceania | |  | | O'Grady, A. P., X. Chen, et al. (2000). "Composition, leaf area index and standing biomass of eucalypt open forests near Darwin in the Northern Territory, Australia." Australian Journal of Botany 48(5): 629-638 | |
| Quercus alba | North America | |  | | Martin; J; Kloeppel; B; Schaefer; T; Kimbler; D; McNulty; S; 1998; Aboveground biomass and nitrogen allocation of ten deciduous southern Appalachian tree species; Canadian Journal of Forest Research; 28; 1648-1659; | |
| Populus grandidentata | North America | |  | | Williams, R. A.; McClenahen, J. R. 1984. Biomass prediction equations for seedlings, sprouts, and saplings of ten central hardwood species. Forest Science. 30: 523-527. | |
| Archidendron spp | Asia | |  | | Samalca, I. 2007. Estimation of forest biomass and its error: A case in Kalimantan, Indonesia. MSc thesis. International Institute for Geo-information Science and Earth Observation, Enschede. | |
| Pinus tabuliformis | Asia | |  | | Zhao, J., Kang, F., Wang, L., Yu, X., Zhao, W., Song, X., Zhang, Y., Chen, F., Sun, Y., He, T. & Han, H. 2014. Patterns of biomass and carbon distribution across a chronosequence of Chinese pine (Pinus tabulaeformis) forests. PLoS One. 9(4), p.e94966. | |
| Acacia mangium | Asia | |  | | Syahrinudin. 2005. The potential of oil palm and forest plantations for carbon sequestration on degraded land in Indonesia. Ecology and Development Series No. 28. Cuviller Verlag GÃ¶ttingen. | |
| Pinus merkusii | Asia | |  | | Miyakuni, K., Heriyanto, N., Heriansyah, I., Imanuddin, R. & Kiyono, Y. 2005. Allometric equations and parameters for estimating the biomass of planted Pinus merkusii Jungh. et de Vr. forests. Japanese Journal of Forest Environment. 47(2): 95-104. | |
| Diospyros spp | Asia | |  | | Samalca, I. 2007. Estimation of forest biomass and its error: A case in Kalimantan, Indonesia. MSc thesis. International Institute for Geo-information Science and Earth Observation, Enschede. | |
| Lophopetalum spp | Asia | |  | | Samalca, I. 2007. Estimation of forest biomass and its error: A case in Kalimantan, Indonesia. MSc thesis. International Institute for Geo-information Science and Earth Observation, Enschede. | |
| Vatica spp | Asia | |  | | Samalca, I. 2007. Estimation of forest biomass and its error: A case in Kalimantan, Indonesia. MSc thesis. International Institute for Geo-information Science and Earth Observation, Enschede. | |
| Pinus tabuliformis | Asia | |  | | Zhao, J., Kang, F., Wang, L., Yu, X., Zhao, W., Song, X., Zhang, Y., Chen, F., Sun, Y., He, T. & Han, H. 2014. Patterns of biomass and carbon distribution across a chronosequence of Chinese pine (Pinus tabulaeformis) forests. PLoS One. 9(4), p.e94966. | |
| Spatholobus ferrugineus | Asia | |  | | Addo-Fordjour, P. & Rahmad, Z. 2013. Development of allometric equations for estimating above-ground liana biomass in tropical primary and secondary forests, Malaysia. International Journal of Ecology. 2013. | |
| Cnestis palala | Asia | |  | | Addo-Fordjour, P. & Rahmad, Z. 2013. Development of allometric equations for estimating above-ground liana biomass in tropical primary and secondary forests, Malaysia. International Journal of Ecology. 2013. | |
| Canarium spp | Asia | |  | | Samalca, I. 2007. Estimation of forest biomass and its error: A case in Kalimantan, Indonesia. MSc thesis. International Institute for Geo-information Science and Earth Observation, Enschede. | |
| Acacia mangium | Asia | |  | | Nurwahyudi., & Tarigan, M. 2001. Logging residue management and productivity in short-rotation Acacia mangium plantation in Riau Province, Sumatra, Indonesia. In Site Management and Productivity in Tropical Plantation Forests. Proceeding of Workshops in Congo July: 109-119. | |
| Dorophyllum spp | Asia | |  | | Samalca, I. 2007. Estimation of forest biomass and its error: A case in Kalimantan, Indonesia. MSc thesis. International Institute for Geo-information Science and Earth Observation, Enschede. | |
| General | Asia | |  | | Huy, B., Kralicek, K., Poudel, K., Phuong, V., Van Khoa, P., Hung, N. & Temesgen, H. 2016. Allometric equations for estimating tree aboveground biomass in evergreen broadleaf forests of Viet Nam. Forest Ecology and Management. 382: 193-205. | |
| Stemonurus spp | Asia | |  | | Samalca, I. 2007. Estimation of forest biomass and its error: A case in Kalimantan, Indonesia. MSc thesis. International Institute for Geo-information Science and Earth Observation, Enschede. | |
| Garcinia spp | Asia | |  | | Samalca, I. 2007. Estimation of forest biomass and its error: A case in Kalimantan, Indonesia. MSc thesis. International Institute for Geo-information Science and Earth Observation, Enschede. | |
| Mezzettia spp | Asia | |  | | Samalca, I. 2007. Estimation of forest biomass and its error: A case in Kalimantan, Indonesia. MSc thesis. International Institute for Geo-information Science and Earth Observation, Enschede. | |
| General | Asia | |  | | Huy, B., Poudel, K. & Temesgen, H. 2016. Aboveground biomass equations for evergreen broadleaf forests in South Central Coastal ecoregion of Viet Nam: Selection of eco-regional or pantropical models. Forest Ecology and Management. 376: 276-283. | |
| General | Asia | |  | | Huy, B., Poudel, K. & Temesgen, H. 2016. Aboveground biomass equations for evergreen broadleaf forests in South Central Coastal ecoregion of Viet Nam: Selection of eco-regional or pantropical models. Forest Ecology and Management. 376: 276-283. | |
| Piper aduncum | Asia | |  | | Hashimoto, T., Tange, T., Masumori, M., Yagi, H., Sasaki, S. & Kojima, K. 2004. Allometric equations for pioneer tree species and estimation of the aboveground biomass of a tropical secondary forest in East Kalimantan. Tropics. 14(1): 123-130. | |
| Lophopetalum spp | Asia | |  | | Samalca, I. 2007. Estimation of forest biomass and its error: A case in Kalimantan, Indonesia. MSc thesis. International Institute for Geo-information Science and Earth Observation, Enschede. | |
| Pinus tabuliformis | Asia | |  | | Zhao, J., Kang, F., Wang, L., Yu, X., Zhao, W., Song, X., Zhang, Y., Chen, F., Sun, Y., He, T. & Han, H. 2014. Patterns of biomass and carbon distribution across a chronosequence of Chinese pine (Pinus tabulaeformis) forests. PLoS One. 9(4), p.e94966. | |
| Willughbeia angustifolia | Asia | |  | | Addo-Fordjour, P. & Rahmad, Z. 2013. Development of allometric equations for estimating above-ground liana biomass in tropical primary and secondary forests, Malaysia. International Journal of Ecology. 2013. | |
| Mezzettia spp | Asia | |  | | Samalca, I. 2007. Estimation of forest biomass and its error: A case in Kalimantan, Indonesia. MSc thesis. International Institute for Geo-information Science and Earth Observation, Enschede. | |
| Baccaurea spp | Asia | |  | | Samalca, I. 2007. Estimation of forest biomass and its error: A case in Kalimantan, Indonesia. MSc thesis. International Institute for Geo-information Science and Earth Observation, Enschede. | |
| General | Asia | |  | | Kenzo, T., Furutani, R., Hattori, D., Kendawang, J., Tanaka, S., Sakurai, K. & Ninomiya, I. 2009. Allometric equations for accurate estimation of above-ground biomass in logged-over tropical rainforests in Sarawak, Malaysia. Journal of Forest Research, 14(6): 365. | |
| Pinus tabuliformis | Asia | |  | | Zhao, J., Kang, F., Wang, L., Yu, X., Zhao, W., Song, X., Zhang, Y., Chen, F., Sun, Y., He, T. & Han, H. 2014. Patterns of biomass and carbon distribution across a chronosequence of Chinese pine (Pinus tabulaeformis) forests. PLoS One. 9(4), p.e94966. | |
| General | Asia | |  | | Hashimoto, T., Tange, T., Masumori, M., Yagi, H., Sasaki, S. & Kojima, K. 2004. Allometric equations for pioneer tree species and estimation of the aboveground biomass of a tropical secondary forest in East Kalimantan. Tropics. 14(1): 123-130. | |
| General | Asia | |  | | McNicol, I., Berry, N., Bruun, T., Hergoualcâ€™h, K., Mertz, O., de Neergaard, A. & Ryan, C. 2015. Development of allometric models for above and belowground biomass in swidden cultivation fallows of Northern Laos. Forest Ecology and Management. 357: 104-116. | |
| General | Asia | |  | | Khalid, N. & Hamid, J. 2017. Development of Allometric Equation for Estimating Aboveground Biomass in Ampang Forest Reserve, Malaysia. Journal of Biodiversity Management & Forestry. 2017. | |
| Heretiera spp | Asia | |  | | Samalca, I. 2007. Estimation of forest biomass and its error: A case in Kalimantan, Indonesia. MSc thesis. International Institute for Geo-information Science and Earth Observation, Enschede. | |
| Tetracera macrophylla | Asia | |  | | Addo-Fordjour, P. & Rahmad, Z. 2013. Development of allometric equations for estimating above-ground liana biomass in tropical primary and secondary forests, Malaysia. International Journal of Ecology. 2013. | |
| Eucalyptus grandis | Asia | |  | | Onrizal, K., Kusmana, C., Mansor, M., & Hartono, R. 2010. Allometric biomass and carbon stock equations of planted Eucalyptus grandis in Toba Plateau, North Sumatra. In: Rimbawanto, A., Febrianto, F., Komar, E.T. (Eds.), Proceedings International Seminar Research on Plantation Forest Management: Challenges and opportunities. 5-6 November 2009. Bogor, Indonesia. Centre for Plantation Forest Research and Development, Bogor. | |
| General | Asia | |  | | Manuri, S., Brack, C., Rusolono, T., Noorâ€™an, F., Verchot, L., Maulana, S., Adinugroho, W., Kurniawan, H., Sukisno, D., Kusuma, G. & Budiman, A. 2017. Effect of species grouping and site variables on aboveground biomass models for lowland tropical forests of the Indo-Malay region. Annals of Forest Science. 74(1): 23. | |
| General | Asia | |  | | Manuri, S., Brack, C., Rusolono, T., Noorâ€™an, F., Verchot, L., Maulana, S., Adinugroho, W., Kurniawan, H., Sukisno, D., Kusuma, G. & Budiman, A. 2017. Effect of species grouping and site variables on aboveground biomass models for lowland tropical forests of the Indo-Malay region. Annals of Forest Science. 74(1): 23. | |
| Lumnitzera racemosa | Asia | |  | | Kangkuso, A., Jamili, J., Septiana, A., Raya, R., Sahidin, I., Rianse, U., Rahim, S., Alfirman, A., Sharma, S. & Nadaoka, K. 2016. Allometric models and aboveground biomass of Lumnitzera racemosa Willd. forest in Rawa Aopa Watumohai National Park, Southeast Sulawesi, Indonesia. Forest Science and Technology. 12(1): 43-50. | |
| General | Asia | |  | | Manuri, S., Brack, C., Rusolono, T., Noorâ€™an, F., Verchot, L., Maulana, S., Adinugroho, W., Kurniawan, H., Sukisno, D., Kusuma, G. & Budiman, A. 2017. Effect of species grouping and site variables on aboveground biomass models for lowland tropical forests of the Indo-Malay region. Annals of Forest Science. 74(1): 23. | |
| Dialium spp | Asia | |  | | Samalca, I. 2007. Estimation of forest biomass and its error: A case in Kalimantan, Indonesia. MSc thesis. International Institute for Geo-information Science and Earth Observation, Enschede. | |
| General | Asia | |  | | Manuri, S., Brack, C., Nugroho, N., Hergoualcâ€™h, K., Novita, N., Dotzauer, H., Verchot, L., Putra, C. & Widyasari, E. 2014. Tree biomass equations for tropical peat swamp forest ecosystems in Indonesia. Forest Ecology and Management. 334: 241-253. | |
| General | Asia | |  | | Manuri, S., Brack, C., Nugroho, N., Hergoualcâ€™h, K., Novita, N., Dotzauer, H., Verchot, L., Putra, C. & Widyasari, E. 2014. Tree biomass equations for tropical peat swamp forest ecosystems in Indonesia. Forest Ecology and Management. 334: 241-253. | |
| General | Asia | |  | | Manuri, S., Brack, C., Nugroho, N., Hergoualcâ€™h, K., Novita, N., Dotzauer, H., Verchot, L., Putra, C. & Widyasari, E. 2014. Tree biomass equations for tropical peat swamp forest ecosystems in Indonesia. Forest Ecology and Management. 334: 241-253. | |
| Pinus tabuliformis | Asia | |  | | Zhao, J., Kang, F., Wang, L., Yu, X., Zhao, W., Song, X., Zhang, Y., Chen, F., Sun, Y., He, T. & Han, H. 2014. Patterns of biomass and carbon distribution across a chronosequence of Chinese pine (Pinus tabulaeformis) forests. PLoS One. 9(4), p.e94966. | |
| Pinus merkusii | Asia | |  | | Miyakuni, K., Heriyanto, N., Heriansyah, I., Imanuddin, R. & Kiyono, Y. 2005. Allometric equations and parameters for estimating the biomass of planted Pinus merkusii Jungh. et de Vr. forests. Japanese Journal of Forest Environment. 47(2): 95-104. | |
| Koompassia spp | Asia | |  | | Samalca, I. 2007. Estimation of forest biomass and its error: A case in Kalimantan, Indonesia. MSc thesis. International Institute for Geo-information Science and Earth Observation, Enschede. | |
| Bouea spp | Asia | |  | | Samalca, I. 2007. Estimation of forest biomass and its error: A case in Kalimantan, Indonesia. MSc thesis. International Institute for Geo-information Science and Earth Observation, Enschede. | |
| Tectona grandis | Asia | |  | | Ounban, W., Puangchit, L. & Diloksumpun, S. 2016. Development of general biomass allometric equations for Tectona grandis Linn. f. and Eucalyptus camaldulensis Dehnh. plantations in Thailand. Agriculture and Natural Resources. 50(1): 48-53. | |
| Lithocarpus spp | Asia | |  | | Samalca, I. 2007. Estimation of forest biomass and its error: A case in Kalimantan, Indonesia. MSc thesis. International Institute for Geo-information Science and Earth Observation, Enschede. | |
| Tectona grandis | Asia | |  | | Ounban, W., Puangchit, L. & Diloksumpun, S. 2016. Development of general biomass allometric equations for Tectona grandis Linn. f. and Eucalyptus camaldulensis Dehnh. plantations in Thailand. Agriculture and Natural Resources. 50(1): 48-53. | |
| Shorea spp | Asia | |  | | Samalca, I. 2007. Estimation of forest biomass and its error: A case in Kalimantan, Indonesia. MSc thesis. International Institute for Geo-information Science and Earth Observation, Enschede. | |
| Dialium spp | Asia | |  | | Samalca, I. 2007. Estimation of forest biomass and its error: A case in Kalimantan, Indonesia. MSc thesis. International Institute for Geo-information Science and Earth Observation, Enschede. | |
| Stemonurus spp | Asia | |  | | Samalca, I. 2007. Estimation of forest biomass and its error: A case in Kalimantan, Indonesia. MSc thesis. International Institute for Geo-information Science and Earth Observation, Enschede. | |
| Dacryodes spp | Asia | |  | | Samalca, I. 2007. Estimation of forest biomass and its error: A case in Kalimantan, Indonesia. MSc thesis. International Institute for Geo-information Science and Earth Observation, Enschede. | |
| Kandelia candel | Asia | |  | | Hossain, M., Saha, C., Abdullah, S., Saha, S. & Siddique, M. 2016. Allometric biomass, nutrient and carbon stock models for Kandelia candel of the Sundarbans, Bangladesh.Â Trees.Â 30(3): 709-717. | |
| Kandelia candel | Asia | |  | | Hossain, M., Saha, C., Abdullah, S., Saha, S. & Siddique, M. 2016. Allometric biomass, nutrient and carbon stock models for Kandelia candel of the Sundarbans, Bangladesh.Â Trees.Â 30(3): 709-717. | |
| Dorophyllum spp | Asia | |  | | Samalca, I. 2007. Estimation of forest biomass and its error: A case in Kalimantan, Indonesia. MSc thesis. International Institute for Geo-information Science and Earth Observation, Enschede. | |
| Lithocarpus spp | Asia | |  | | Samalca, I. 2007. Estimation of forest biomass and its error: A case in Kalimantan, Indonesia. MSc thesis. International Institute for Geo-information Science and Earth Observation, Enschede. | |
| Tetracera macrophylla | Asia | |  | | Addo-Fordjour, P. & Rahmad, Z. 2013. Development of allometric equations for estimating above-ground liana biomass in tropical primary and secondary forests, Malaysia. International Journal of Ecology. 2013. | |
| Tetracera macrophylla | Asia | |  | | Addo-Fordjour, P. & Rahmad, Z. 2013. Development of allometric equations for estimating above-ground liana biomass in tropical primary and secondary forests, Malaysia. International Journal of Ecology. 2013. | |
| Bruguiera parviflora | Asia | |  | | Nugroho, N. 2014. Developing Site-specific Allometric Equations for Above-ground Biomass Estimation in Peat Swamp Forests of Rokan Hilir District, Riau Province, Indonesia. Indonesian Journal of Forestry Research. 1(1): 47-65. | |
| Coffea spp | Asia | |  | | Hairiah, K., Arifin, J., Berlain, Prayogo, C., van Noordwijk, M. 2002. Carbon stock assessment for a forest-to-coffee conversion landscape in Malang (East Java) and Sumber Jaya (Lampung) Indonesia. International Symposium on Forest Carbon Sequestration and Monitoring. pp. 28-36. | |
| Acacia mangium | Asia | |  | | Nurwahyudi & Tarigan, M. 2004. Logging Residue Management and Productivity in Short-rotation Acacia mangium Plantations in Riau Province, Sumatra, Indonesia. In Site Management and Productivity in Tropical Plantation Forests: Proceedings of Workshops in Congo, July 2001 and China, February 2003 (p. 109). CIFOR. | |
| Shorea spp | Asia | |  | | Samalca, I. 2007. Estimation of forest biomass and its error: A case in Kalimantan, Indonesia. MSc thesis. International Institute for Geo-information Science and Earth Observation, Enschede. | |
| Fitzroya cupressoides | South America | |  | | Vann, D., Palmiotto, P. & Strimbeck, G. 1998. Allometric equations for two South American conifers: test of a non-destructive method. Forest Ecology and Management. 106(2-3): 55-71. | |
| Fitzroya cupressoides | South America | |  | | Vann, D., Palmiotto, P. & Strimbeck, G. 1998. Allometric equations for two South American conifers: test of a non-destructive method. Forest Ecology and Management. 106(2-3): 55-71. | |
| Pinus merkusii | Asia | |  | | Miyakuni, K., Heriyanto, N., Heriansyah, I., Imanuddin, R. & Kiyono, Y. 2005. Allometric equations and parameters for estimating the biomass of planted Pinus merkusii Jungh. et de Vr. forests. Japanese Journal of Forest Environment. 47(2): 95-104. | |
| Pinus merkusii | Asia | |  | | Miyakuni, K., Heriyanto, N., Heriansyah, I., Imanuddin, R. & Kiyono, Y. 2005. Allometric equations and parameters for estimating the biomass of planted Pinus merkusii Jungh. et de Vr. forests. Japanese Journal of Forest Environment. 47(2): 95-104. | |
| Dacryodes spp | Asia | |  | | Samalca, I. 2007. Estimation of forest biomass and its error: A case in Kalimantan, Indonesia. MSc thesis. International Institute for Geo-information Science and Earth Observation, Enschede. | |
| Parishia spp | Asia | |  | | Samalca, I. 2007. Estimation of forest biomass and its error: A case in Kalimantan, Indonesia. MSc thesis. International Institute for Geo-information Science and Earth Observation, Enschede. | |
| Dalbergia rostrata | Asia | |  | | Addo-Fordjour, P. & Rahmad, Z. 2013. Development of allometric equations for estimating above-ground liana biomass in tropical primary and secondary forests, Malaysia. International Journal of Ecology. 2013. | |
| General | Asia | |  | | Samalca, I. 2007. Estimation of forest biomass and its error: A case in Kalimantan, Indonesia. MSc thesis. International Institute for Geo-information Science and Earth Observation, Enschede. | |
| Knema spp | Asia | |  | | Samalca, I. 2007. Estimation of forest biomass and its error: A case in Kalimantan, Indonesia. MSc thesis. International Institute for Geo-information Science and Earth Observation, Enschede. | |
| Dalbergia rostrata | Asia | |  | | Addo-Fordjour, P. & Rahmad, Z. 2013. Development of allometric equations for estimating above-ground liana biomass in tropical primary and secondary forests, Malaysia. International Journal of Ecology. 2013. | |
| General | Asia | |  | | Monda, Y., Ito, E., Kiyono, Y., Sato, T., Toriyama, J., Sokh, H., Chann, S., Tith, B., Keth, S., Phallaphearaoth, O. & Bounthabandid, S. 2016. Allometric Equations for Tropical Seasonal Deciduous Forests in Cambodia: A Method of Estimating Belowground Tree Biomass with Reduced Sampling Loss of Roots. Japan Agricultural Research Quarterly: JARQ. 50(4): 369-377. | |
| Cyathostemma hookeri | Asia | |  | | Addo-Fordjour, P. & Rahmad, Z. 2013. Development of allometric equations for estimating above-ground liana biomass in tropical primary and secondary forests, Malaysia. International Journal of Ecology. 2013. | |
| Cyathostemma hookeri | Asia | |  | | Addo-Fordjour, P. & Rahmad, Z. 2013. Development of allometric equations for estimating above-ground liana biomass in tropical primary and secondary forests, Malaysia. International Journal of Ecology. 2013. | |
| Pilgerodendron uviferum | South America | |  | | Vann, D., Palmiotto, P. & Strimbeck, G. 1998. Allometric equations for two South American conifers: test of a non-destructive method. Forest Ecology and Management. 106(2-3): 55-71. | |
| Drypetes spp | Asia | |  | | Samalca, I. 2007. Estimation of forest biomass and its error: A case in Kalimantan, Indonesia. MSc thesis. International Institute for Geo-information Science and Earth Observation, Enschede. | |
| Xanthophyllum spp | Asia | |  | | Samalca, I. 2007. Estimation of forest biomass and its error: A case in Kalimantan, Indonesia. MSc thesis. International Institute for Geo-information Science and Earth Observation, Enschede. | |
| Strychnos curtisii | Asia | |  | | Addo-Fordjour, P. & Rahmad, Z. 2013. Development of allometric equations for estimating above-ground liana biomass in tropical primary and secondary forests, Malaysia. International Journal of Ecology. 2013. | |
| Kandelia candel | Asia | |  | | Hossain, M., Saha, C., Abdullah, S., Saha, S. & Siddique, M. 2016. Allometric biomass, nutrient and carbon stock models for Kandelia candel of the Sundarbans, Bangladesh.Â Trees.Â 30(3): 709-717. | |
| Cyathostemma hookeri | Asia | |  | | Addo-Fordjour, P. & Rahmad, Z. 2013. Development of allometric equations for estimating above-ground liana biomass in tropical primary and secondary forests, Malaysia. International Journal of Ecology. 2013. | |
| Eucalyptus camaldulensis | Asia | |  | | Ounban, W., Puangchit, L. & Diloksumpun, S. 2016. Development of general biomass allometric equations for Tectona grandis Linn. f. and Eucalyptus camaldulensis Dehnh. plantations in Thailand. Agriculture and Natural Resources. 50(1): 48-53. | |
| Hydnocarpus ilicifolia | Asia | |  | | Sabharsi, S., Khenmark, C., Aksornhoae, S. & Ratisoonthorn, P. 1968. Primary Production in Dry-Evergreen Forest at Sakaerat, Amphoe Pak Thongchai, Changwat Nakhonratchasima. 1. Estimation of Biomass and Distribution amongst various organs. ASRCT Cooperative Research Program. (27). | |
| General | Asia | |  | | Sabharsi, S., Khenmark, C., Aksornhoae, S. & Ratisoonthorn, P. 1968. Primary Production in Dry-Evergreen Forest at Sakaerat, Amphoe Pak Thongchai, Changwat Nakhonratchasima. 1. Estimation of Biomass and Distribution amongst various organs. ASRCT Cooperative Research Program. (27). | |
| Hopea ferrea | Asia | |  | | Sabharsi, S., Khenmark, C., Aksornhoae, S. & Ratisoonthorn, P. 1968. Primary Production in Dry-Evergreen Forest at Sakaerat, Amphoe Pak Thongchai, Changwat Nakhonratchasima. 1. Estimation of Biomass and Distribution amongst various organs. ASRCT Cooperative Research Program. (27). | |
| Coptosapelta parviflora | Asia | |  | | Addo-Fordjour, P. & Rahmad, Z. 2013. Development of allometric equations for estimating above-ground liana biomass in tropical primary and secondary forests, Malaysia. International Journal of Ecology. 2013. | |
| Coptosapelta parviflora | Asia | |  | | Addo-Fordjour, P. & Rahmad, Z. 2013. Development of allometric equations for estimating above-ground liana biomass in tropical primary and secondary forests, Malaysia. International Journal of Ecology. 2013. | |
| Coptosapelta parviflora | Asia | |  | | Addo-Fordjour, P. & Rahmad, Z. 2013. Development of allometric equations for estimating above-ground liana biomass in tropical primary and secondary forests, Malaysia. International Journal of Ecology. 2013. | |
| General | South America | |  | | Sato, T., Saito, M., Ramirez, D., de Molas, L., Toriyama, J., Monda, Y., Kiyono, Y., Herebia, E., Dubie, N., Vera, E. & Ortega, J. 2015. Development of allometric equations for tree biomass in forest ecosystems in Paraguay. Japan Agricultural Research Quarterly. 49(3): 281-291. | |
| Willughbeia angustifolia | Asia | |  | | Addo-Fordjour, P. & Rahmad, Z. 2013. Development of allometric equations for estimating above-ground liana biomass in tropical primary and secondary forests, Malaysia. International Journal of Ecology. 2013. | |
| Dalbergia rostrata | Asia | |  | | Addo-Fordjour, P. & Rahmad, Z. 2013. Development of allometric equations for estimating above-ground liana biomass in tropical primary and secondary forests, Malaysia. International Journal of Ecology. 2013. | |
| Shorea spp | Asia | |  | | Samalca, I. 2007. Estimation of forest biomass and its error: A case in Kalimantan, Indonesia. MSc thesis. International Institute for Geo-information Science and Earth Observation, Enschede. | |
| Madhuca spp | Asia | |  | | Samalca, I. 2007. Estimation of forest biomass and its error: A case in Kalimantan, Indonesia. MSc thesis. International Institute for Geo-information Science and Earth Observation, Enschede. | |
| Rourea rugosa | Asia | |  | | Addo-Fordjour, P. & Rahmad, Z. 2013. Development of allometric equations for estimating above-ground liana biomass in tropical primary and secondary forests, Malaysia. International Journal of Ecology. 2013. | |
| Rourea rugosa | Asia | |  | | Addo-Fordjour, P. & Rahmad, Z. 2013. Development of allometric equations for estimating above-ground liana biomass in tropical primary and secondary forests, Malaysia. International Journal of Ecology. 2013. | |
| Spatholobus ferrugineus | Asia | |  | | Addo-Fordjour, P. & Rahmad, Z. 2013. Development of allometric equations for estimating above-ground liana biomass in tropical primary and secondary forests, Malaysia. International Journal of Ecology. 2013. | |
| Scaphium spp | Asia | |  | | Samalca, I. 2007. Estimation of forest biomass and its error: A case in Kalimantan, Indonesia. MSc thesis. International Institute for Geo-information Science and Earth Observation, Enschede. | |
| Allantospermum spp | Asia | |  | | Samalca, I. 2007. Estimation of forest biomass and its error: A case in Kalimantan, Indonesia. MSc thesis. International Institute for Geo-information Science and Earth Observation, Enschede. | |
| Pilgerodendron uviferum | South America | |  | | Vann, D., Palmiotto, P. & Strimbeck, G. 1998. Allometric equations for two South American conifers: test of a non-destructive method. Forest Ecology and Management. 106(2-3): 55-71. | |
| Geunsia pentandra | Asia | |  | | Hashimoto, T., Tange, T., Masumori, M., Yagi, H., Sasaki, S. & Kojima, K. 2004. Allometric equations for pioneer tree species and estimation of the aboveground biomass of a tropical secondary forest in East Kalimantan. Tropics. 14(1): 123-130. | |
| General | Asia | |  | | Hashimoto, T., Tange, T., Masumori, M., Yagi, H., Sasaki, S. & Kojima, K. 2004. Allometric equations for pioneer tree species and estimation of the aboveground biomass of a tropical secondary forest in East Kalimantan. Tropics. 14(1): 123-130. | |
| Cnestis palala | Asia | |  | | Addo-Fordjour, P. & Rahmad, Z. 2013. Development of allometric equations for estimating above-ground liana biomass in tropical primary and secondary forests, Malaysia. International Journal of Ecology. 2013. | |
| Heretiera spp | Asia | |  | | Samalca, I. 2007. Estimation of forest biomass and its error: A case in Kalimantan, Indonesia. MSc thesis. International Institute for Geo-information Science and Earth Observation, Enschede. | |
| Scaphium spp | Asia | |  | | Samalca, I. 2007. Estimation of forest biomass and its error: A case in Kalimantan, Indonesia. MSc thesis. International Institute for Geo-information Science and Earth Observation, Enschede. | |
| Tectona grandis | Asia | |  | | Kato T., Rohman., Oktalina S., Supryo H., & Simon. 2005. Allometric Patterns of Young Teak Trees Managed With Different Silvicultural Systems in Madiun, Indonesia. In FORDA & JICA. Proceedings of the 2nd Workshop on Demonstration Study on Carbon Fixing Forest Management in Indonesia: How to increase the welfare of local people through the sustainable forest management. Bogor, January 11, 2005. | |
| Strychnos ignatii | Asia | |  | | Addo-Fordjour, P. & Rahmad, Z. 2013. Development of allometric equations for estimating above-ground liana biomass in tropical primary and secondary forests, Malaysia. International Journal of Ecology. 2013. | |
| Parishia spp | Asia | |  | | Samalca, I. 2007. Estimation of forest biomass and its error: A case in Kalimantan, Indonesia. MSc thesis. International Institute for Geo-information Science and Earth Observation, Enschede. | |
| Pinus merkusii | Asia | |  | | Miyakuni, K., Heriyanto, N., Heriansyah, I., Imanuddin, R. & Kiyono, Y. 2005. Allometric equations and parameters for estimating the biomass of planted Pinus merkusii Jungh. et de Vr. forests. Japanese Journal of Forest Environment. 47(2): 95-104. | |
| Eucalyptus camaldulensis | Asia | |  | | Ounban, W., Puangchit, L. & Diloksumpun, S. 2016. Development of general biomass allometric equations for Tectona grandis Linn. f. and Eucalyptus camaldulensis Dehnh. plantations in Thailand. Agriculture and Natural Resources. 50(1): 48-53. | |
| Pinus merkusii | Asia | |  | | Miyakuni, K., Heriyanto, N., Heriansyah, I., Imanuddin, R. & Kiyono, Y. 2005. Allometric equations and parameters for estimating the biomass of planted Pinus merkusii Jungh. et de Vr. forests. Japanese Journal of Forest Environment. 47(2): 95-104. | |
| Trema cannabina | Asia | |  | | Hiratsuka, M., Toma, T., Diana, R., Hadriyanto, D. & Morikawa, Y. 2006. Biomass recovery of naturally regenerated vegetation after the 1998 forest fire in East Kalimantan, Indonesia. Japan Agricultural Research Quarterly: JARQ. 40(3): 277-282. | |
| Pinus merkusii | Asia | |  | | Miyakuni, K., Heriyanto, N., Heriansyah, I., Imanuddin, R. & Kiyono, Y. 2005. Allometric equations and parameters for estimating the biomass of planted Pinus merkusii Jungh. et de Vr. forests. Japanese Journal of Forest Environment. 47(2): 95-104. | |
| Strychnos ignatii | Asia | |  | | Addo-Fordjour, P. & Rahmad, Z. 2013. Development of allometric equations for estimating above-ground liana biomass in tropical primary and secondary forests, Malaysia. International Journal of Ecology. 2013. | |
| Eugenia spp | Asia | |  | | Nugroho, N. 2014. Developing Site-specific Allometric Equations for Above-ground Biomass Estimation in Peat Swamp Forests of Rokan Hilir District, Riau Province, Indonesia. Indonesian Journal of Forestry Research. 1(1): 47-65. | |
| Garcinia celebica | Asia | |  | | Nugroho, N. 2014. Developing Site-specific Allometric Equations for Above-ground Biomass Estimation in Peat Swamp Forests of Rokan Hilir District, Riau Province, Indonesia. Indonesian Journal of Forestry Research. 1(1): 47-65. | |
| General | South America | |  | | Sato, T., Saito, M., Ramirez, D., de Molas, L., Toriyama, J., Monda, Y., Kiyono, Y., Herebia, E., Dubie, N., Vera, E. & Ortega, J. 2015. Development of allometric equations for tree biomass in forest ecosystems in Paraguay. Japan Agricultural Research Quarterly. 49(3): 281-291. | |
| Syzygium spp | Asia | |  | | Samalca, I. 2007. Estimation of forest biomass and its error: A case in Kalimantan, Indonesia. MSc thesis. International Institute for Geo-information Science and Earth Observation, Enschede. | |
| Melaleuca cajuputi | Asia | |  | | Alpian, A., Prayitno, T., Sutapa, J. & Budiadi, B. 2013. Biomass Distribution of Cajuput Stand in Central Kalimantan Swamp Forest. Jurnal Manajemen Hutan Tropika. 19(1): 1-10. | |
| Cnestis palala | Asia | |  | | Addo-Fordjour, P. & Rahmad, Z. 2013. Development of allometric equations for estimating above-ground liana biomass in tropical primary and secondary forests, Malaysia. International Journal of Ecology. 2013. | |
| Heretiera spp | Asia | |  | | Samalca, I. 2007. Estimation of forest biomass and its error: A case in Kalimantan, Indonesia. MSc thesis. International Institute for Geo-information Science and Earth Observation, Enschede. | |
| Alseodaphne spp | Asia | |  | | Samalca, I. 2007. Estimation of forest biomass and its error: A case in Kalimantan, Indonesia. MSc thesis. International Institute for Geo-information Science and Earth Observation, Enschede. | |
| Willughbeia spp | Asia | |  | | Addo-Fordjour, P. & Rahmad, Z. 2013. Development of allometric equations for estimating above-ground liana biomass in tropical primary and secondary forests, Malaysia. International Journal of Ecology. 2013. | |
| Calophyllum spp | Asia | |  | | Samalca, I. 2007. Estimation of forest biomass and its error: A case in Kalimantan, Indonesia. MSc thesis. International Institute for Geo-information Science and Earth Observation, Enschede. | |
| Archidendron spp | Asia | |  | | Samalca, I. 2007. Estimation of forest biomass and its error: A case in Kalimantan, Indonesia. MSc thesis. International Institute for Geo-information Science and Earth Observation, Enschede. | |
| Mangifera spp | Asia | |  | | Samalca, I. 2007. Estimation of forest biomass and its error: A case in Kalimantan, Indonesia. MSc thesis. International Institute for Geo-information Science and Earth Observation, Enschede. | |
| General | Asia | |  | | Manuri, S., Brack, C., Nugroho, N., Hergoualcâ€™h, K., Novita, N., Dotzauer, H., Verchot, L., Putra, C. & Widyasari, E. 2014. Tree biomass equations for tropical peat swamp forest ecosystems in Indonesia. Forest Ecology and Management. 334: 241-253. | |
| General | South America | |  | | Sato, T., Saito, M., Ramirez, D., de Molas, L., Toriyama, J., Monda, Y., Kiyono, Y., Herebia, E., Dubie, N., Vera, E. & Ortega, J. 2015. Development of allometric equations for tree biomass in forest ecosystems in Paraguay. Japan Agricultural Research Quarterly. 49(3): 281-291. | |
| General | South America | |  | | Sato, T., Saito, M., Ramirez, D., de Molas, L., Toriyama, J., Monda, Y., Kiyono, Y., Herebia, E., Dubie, N., Vera, E. & Ortega, J. 2015. Development of allometric equations for tree biomass in forest ecosystems in Paraguay. Japan Agricultural Research Quarterly. 49(3): 281-291. | |
| General | Asia | |  | | Manuri, S., Brack, C., Nugroho, N., Hergoualcâ€™h, K., Novita, N., Dotzauer, H., Verchot, L., Putra, C. & Widyasari, E. 2014. Tree biomass equations for tropical peat swamp forest ecosystems in Indonesia. Forest Ecology and Management. 334: 241-253. | |
| General | Asia | |  | | Xu, Y., Zhang, J., Franklin, S., Liang, J., Ding, P., Luo, Y., Lu, Z., Bao, D. & Jiang, M. 2015. Improving allometry models to estimate the aboveâ€and belowground biomass of subtropical forest, China. Ecosphere. 6(12): 1-15. | |
| Canarium spp | Asia | |  | | Samalca, I. 2007. Estimation of forest biomass and its error: A case in Kalimantan, Indonesia. MSc thesis. International Institute for Geo-information Science and Earth Observation, Enschede. | |
| General | South America | |  | | Sato, T., Saito, M., Ramirez, D., de Molas, L., Toriyama, J., Monda, Y., Kiyono, Y., Herebia, E., Dubie, N., Vera, E. & Ortega, J. 2015. Development of allometric equations for tree biomass in forest ecosystems in Paraguay. Japan Agricultural Research Quarterly. 49(3): 281-291. | |
| Diospyros spp | Asia | |  | | Samalca, I. 2007. Estimation of forest biomass and its error: A case in Kalimantan, Indonesia. MSc thesis. International Institute for Geo-information Science and Earth Observation, Enschede. | |
| Ilex macrophylla | Asia | |  | | Nugroho, N. 2014. Developing Site-specific Allometric Equations for Above-ground Biomass Estimation in Peat Swamp Forests of Rokan Hilir District, Riau Province, Indonesia. Indonesian Journal of Forestry Research. 1(1): 47-65. | |
| Allantospermum spp | Asia | |  | | Samalca, I. 2007. Estimation of forest biomass and its error: A case in Kalimantan, Indonesia. MSc thesis. International Institute for Geo-information Science and Earth Observation, Enschede. | |
| General | Asia | |  | | Samalca, I. 2007. Estimation of forest biomass and its error: A case in Kalimantan, Indonesia. MSc thesis. International Institute for Geo-information Science and Earth Observation, Enschede. | |
| Horsfieldia glabra | Asia | |  | | Nugroho, N. 2014. Developing Site-specific Allometric Equations for Above-ground Biomass Estimation in Peat Swamp Forests of Rokan Hilir District, Riau Province, Indonesia. Indonesian Journal of Forestry Research. 1(1): 47-65. | |
| Xanthophyllum spp | Asia | |  | | Samalca, I. 2007. Estimation of forest biomass and its error: A case in Kalimantan, Indonesia. MSc thesis. International Institute for Geo-information Science and Earth Observation, Enschede. | |
| Knema spp | Asia | |  | | Samalca, I. 2007. Estimation of forest biomass and its error: A case in Kalimantan, Indonesia. MSc thesis. International Institute for Geo-information Science and Earth Observation, Enschede. | |
| Willughbeia angustifolia | Asia | |  | | Addo-Fordjour, P. & Rahmad, Z. 2013. Development of allometric equations for estimating above-ground liana biomass in tropical primary and secondary forests, Malaysia. International Journal of Ecology. 2013. | |
| Syzygium spp | Asia | |  | | Samalca, I. 2007. Estimation of forest biomass and its error: A case in Kalimantan, Indonesia. MSc thesis. International Institute for Geo-information Science and Earth Observation, Enschede. | |
| Pinus merkusii | Asia | |  | | Miyakuni, K., Heriyanto, N., Heriansyah, I., Imanuddin, R. & Kiyono, Y. 2005. Allometric equations and parameters for estimating the biomass of planted Pinus merkusii Jungh. et de Vr. forests. Japanese Journal of Forest Environment. 47(2): 95-104. | |
| Pinus merkusii | Asia | |  | | Miyakuni, K., Heriyanto, N., Heriansyah, I., Imanuddin, R. & Kiyono, Y. 2005. Allometric equations and parameters for estimating the biomass of planted Pinus merkusii Jungh. et de Vr. forests. Japanese Journal of Forest Environment. 47(2): 95-104. | |
| Artabotrys oblongus | Asia | |  | | Addo-Fordjour, P. & Rahmad, Z. 2013. Development of allometric equations for estimating above-ground liana biomass in tropical primary and secondary forests, Malaysia. International Journal of Ecology. 2013. | |
| Artabotrys oblongus | Asia | |  | | Addo-Fordjour, P. & Rahmad, Z. 2013. Development of allometric equations for estimating above-ground liana biomass in tropical primary and secondary forests, Malaysia. International Journal of Ecology. 2013. | |
| Artabotrys oblongus | Asia | |  | | Addo-Fordjour, P. & Rahmad, Z. 2013. Development of allometric equations for estimating above-ground liana biomass in tropical primary and secondary forests, Malaysia. International Journal of Ecology. 2013. | |
| General | Asia | |  | | Manuri, S., Brack, C., Nugroho, N., Hergoualcâ€™h, K., Novita, N., Dotzauer, H., Verchot, L., Putra, C. & Widyasari, E. 2014. Tree biomass equations for tropical peat swamp forest ecosystems in Indonesia. Forest Ecology and Management. 334: 241-253. | |
| Dialium spp | Asia | |  | | Samalca, I. 2007. Estimation of forest biomass and its error: A case in Kalimantan, Indonesia. MSc thesis. International Institute for Geo-information Science and Earth Observation, Enschede. | |
| Koompassia spp | Asia | |  | | Samalca, I. 2007. Estimation of forest biomass and its error: A case in Kalimantan, Indonesia. MSc thesis. International Institute for Geo-information Science and Earth Observation, Enschede. | |
| Drypetes spp | Asia | |  | | Samalca, I. 2007. Estimation of forest biomass and its error: A case in Kalimantan, Indonesia. MSc thesis. International Institute for Geo-information Science and Earth Observation, Enschede. | |
| General | South America | |  | | Sato, T., Saito, M., Ramirez, D., de Molas, L., Toriyama, J., Monda, Y., Kiyono, Y., Herebia, E., Dubie, N., Vera, E. & Ortega, J. 2015. Development of allometric equations for tree biomass in forest ecosystems in Paraguay. Japan Agricultural Research Quarterly. 49(3): 281-291. | |
| General | South America | |  | | Sato, T., Saito, M., Ramirez, D., de Molas, L., Toriyama, J., Monda, Y., Kiyono, Y., Herebia, E., Dubie, N., Vera, E. & Ortega, J. 2015. Development of allometric equations for tree biomass in forest ecosystems in Paraguay. Japan Agricultural Research Quarterly. 49(3): 281-291. | |
| General | South America | |  | | Sato, T., Saito, M., Ramirez, D., de Molas, L., Toriyama, J., Monda, Y., Kiyono, Y., Herebia, E., Dubie, N., Vera, E. & Ortega, J. 2015. Development of allometric equations for tree biomass in forest ecosystems in Paraguay. Japan Agricultural Research Quarterly. 49(3): 281-291. | |
| Xanthophyllum spp | Asia | |  | | Samalca, I. 2007. Estimation of forest biomass and its error: A case in Kalimantan, Indonesia. MSc thesis. International Institute for Geo-information Science and Earth Observation, Enschede. | |
| General | Asia | |  | | Huy, B., Poudel, K. & Temesgen, H. 2016. Aboveground biomass equations for evergreen broadleaf forests in South Central Coastal ecoregion of Viet Nam: Selection of eco-regional or pantropical models. Forest Ecology and Management. 376: 276-283. | |
| Drypetes spp | Asia | |  | | Samalca, I. 2007. Estimation of forest biomass and its error: A case in Kalimantan, Indonesia. MSc thesis. International Institute for Geo-information Science and Earth Observation, Enschede. | |
| Scaphium spp | Asia | |  | | Samalca, I. 2007. Estimation of forest biomass and its error: A case in Kalimantan, Indonesia. MSc thesis. International Institute for Geo-information Science and Earth Observation, Enschede. | |
| Shorea teysmanniana | Asia | |  | | Nugroho, N. 2014. Developing Site-specific Allometric Equations for Above-ground Biomass Estimation in Peat Swamp Forests of Rokan Hilir District, Riau Province, Indonesia. Indonesian Journal of Forestry Research. 1(1): 47-65. | |
| Rourea rugosa | Asia | |  | | Addo-Fordjour, P. & Rahmad, Z. 2013. Development of allometric equations for estimating above-ground liana biomass in tropical primary and secondary forests, Malaysia. International Journal of Ecology. 2013. | |
| Palaquium obovatum | Asia | |  | | Nugroho, N. 2014. Developing Site-specific Allometric Equations for Above-ground Biomass Estimation in Peat Swamp Forests of Rokan Hilir District, Riau Province, Indonesia. Indonesian Journal of Forestry Research. 1(1): 47-65. | |
| Parastemon urophyllus | Asia | |  | | Nugroho, N. 2014. Developing Site-specific Allometric Equations for Above-ground Biomass Estimation in Peat Swamp Forests of Rokan Hilir District, Riau Province, Indonesia. Indonesian Journal of Forestry Research. 1(1): 47-65. | |
| General | Asia | |  | | Descloux, S., Chanudet, V., PoilvÃ©, H. & GrÃ©goire, A. 2011. Co-assessment of biomass and soil organic carbon stocks in a future reservoir area located in Southeast Asia. Environmental Monitoring and Assessment. 173(1-4): 723-741. | |
| Archidendron spp | Asia | |  | | Samalca, I. 2007. Estimation of forest biomass and its error: A case in Kalimantan, Indonesia. MSc thesis. International Institute for Geo-information Science and Earth Observation, Enschede. | |
| Willughbeia spp | Asia | |  | | Addo-Fordjour, P. & Rahmad, Z. 2013. Development of allometric equations for estimating above-ground liana biomass in tropical primary and secondary forests, Malaysia. International Journal of Ecology. 2013. | |
| Salacia spp | Asia | |  | | Addo-Fordjour, P. & Rahmad, Z. 2013. Development of allometric equations for estimating above-ground liana biomass in tropical primary and secondary forests, Malaysia. International Journal of Ecology. 2013. | |
| Salacia spp | Asia | |  | | Addo-Fordjour, P. & Rahmad, Z. 2013. Development of allometric equations for estimating above-ground liana biomass in tropical primary and secondary forests, Malaysia. International Journal of Ecology. 2013. | |
| Salacia spp | Asia | |  | | Addo-Fordjour, P. & Rahmad, Z. 2013. Development of allometric equations for estimating above-ground liana biomass in tropical primary and secondary forests, Malaysia. International Journal of Ecology. 2013. | |
| Gonystylus bancanus | Asia | |  | | Nugroho, N. 2014. Developing Site-specific Allometric Equations for Above-ground Biomass Estimation in Peat Swamp Forests of Rokan Hilir District, Riau Province, Indonesia. Indonesian Journal of Forestry Research. 1(1): 47-65. | |
| Agelaea macrophylla | Asia | |  | | Addo-Fordjour, P. & Rahmad, Z. 2013. Development of allometric equations for estimating above-ground liana biomass in tropical primary and secondary forests, Malaysia. International Journal of Ecology. 2013. | |
| Agelaea macrophylla | Asia | |  | | Addo-Fordjour, P. & Rahmad, Z. 2013. Development of allometric equations for estimating above-ground liana biomass in tropical primary and secondary forests, Malaysia. International Journal of Ecology. 2013. | |
| Canarium spp | Asia | |  | | Samalca, I. 2007. Estimation of forest biomass and its error: A case in Kalimantan, Indonesia. MSc thesis. International Institute for Geo-information Science and Earth Observation, Enschede. | |
| Madhuca spp | Asia | |  | | Samalca, I. 2007. Estimation of forest biomass and its error: A case in Kalimantan, Indonesia. MSc thesis. International Institute for Geo-information Science and Earth Observation, Enschede. | |
| Knema spp | Asia | |  | | Samalca, I. 2007. Estimation of forest biomass and its error: A case in Kalimantan, Indonesia. MSc thesis. International Institute for Geo-information Science and Earth Observation, Enschede. | |
| Alseodaphne spp | Asia | |  | | Samalca, I. 2007. Estimation of forest biomass and its error: A case in Kalimantan, Indonesia. MSc thesis. International Institute for Geo-information Science and Earth Observation, Enschede. | |
| Calophyllum spp | Asia | |  | | Samalca, I. 2007. Estimation of forest biomass and its error: A case in Kalimantan, Indonesia. MSc thesis. International Institute for Geo-information Science and Earth Observation, Enschede. | |
| Garcinia spp | Asia | |  | | Samalca, I. 2007. Estimation of forest biomass and its error: A case in Kalimantan, Indonesia. MSc thesis. International Institute for Geo-information Science and Earth Observation, Enschede. | |
| Bouea spp | Asia | |  | | Samalca, I. 2007. Estimation of forest biomass and its error: A case in Kalimantan, Indonesia. MSc thesis. International Institute for Geo-information Science and Earth Observation, Enschede. | |
| Pinus tabuliformis | Asia | |  | | Zhao, J., Kang, F., Wang, L., Yu, X., Zhao, W., Song, X., Zhang, Y., Chen, F., Sun, Y., He, T. & Han, H. 2014. Patterns of biomass and carbon distribution across a chronosequence of Chinese pine (Pinus tabulaeformis) forests. PLoS One. 9(4), p.e94966. | |
| Syzygium spp | Asia | |  | | Samalca, I. 2007. Estimation of forest biomass and its error: A case in Kalimantan, Indonesia. MSc thesis. International Institute for Geo-information Science and Earth Observation, Enschede. | |
| General | Asia | |  | | Samalca, I. 2007. Estimation of forest biomass and its error: A case in Kalimantan, Indonesia. MSc thesis. International Institute for Geo-information Science and Earth Observation, Enschede. | |
| Gnetum latifolium | Asia | |  | | Addo-Fordjour, P. & Rahmad, Z. 2013. Development of allometric equations for estimating above-ground liana biomass in tropical primary and secondary forests, Malaysia. International Journal of Ecology. 2013. | |
| Gnetum latifolium | Asia | |  | | Addo-Fordjour, P. & Rahmad, Z. 2013. Development of allometric equations for estimating above-ground liana biomass in tropical primary and secondary forests, Malaysia. International Journal of Ecology. 2013. | |
| Gnetum latifolium | Asia | |  | | Addo-Fordjour, P. & Rahmad, Z. 2013. Development of allometric equations for estimating above-ground liana biomass in tropical primary and secondary forests, Malaysia. International Journal of Ecology. 2013. | |
| Agelaea macrophylla | Asia | |  | | Addo-Fordjour, P. & Rahmad, Z. 2013. Development of allometric equations for estimating above-ground liana biomass in tropical primary and secondary forests, Malaysia. International Journal of Ecology. 2013. | |
| Baccaurea spp | Asia | |  | | Samalca, I. 2007. Estimation of forest biomass and its error: A case in Kalimantan, Indonesia. MSc thesis. International Institute for Geo-information Science and Earth Observation, Enschede. | |
| Mangifera spp | Asia | |  | | Samalca, I. 2007. Estimation of forest biomass and its error: A case in Kalimantan, Indonesia. MSc thesis. International Institute for Geo-information Science and Earth Observation, Enschede. | |
| Pinus merkusii | Asia | |  | | Miyakuni, K., Heriyanto, N., Heriansyah, I., Imanuddin, R. & Kiyono, Y. 2005. Allometric equations and parameters for estimating the biomass of planted Pinus merkusii Jungh. et de Vr. forests. Japanese Journal of Forest Environment. 47(2): 95-104. | |
| Dacryodes spp | Asia | |  | | Samalca, I. 2007. Estimation of forest biomass and its error: A case in Kalimantan, Indonesia. MSc thesis. International Institute for Geo-information Science and Earth Observation, Enschede. | |
| Campnosperma coriaceum | Asia | |  | | Nugroho, N. 2014. Developing Site-specific Allometric Equations for Above-ground Biomass Estimation in Peat Swamp Forests of Rokan Hilir District, Riau Province, Indonesia. Indonesian Journal of Forestry Research. 1(1): 47-65. | |
| Willughbeia spp | Asia | |  | | Addo-Fordjour, P. & Rahmad, Z. 2013. Development of allometric equations for estimating above-ground liana biomass in tropical primary and secondary forests, Malaysia. International Journal of Ecology. 2013. | |
| Melaleuca cajuputi | Asia | |  | | Alpian, A., Prayitno, T., Sutapa, J. & Budiadi, B. 2013. Biomass Distribution of Cajuput Stand in Central Kalimantan Swamp Forest. Jurnal Manajemen Hutan Tropika. 19(1): 1-10. | |
| Vatica spp | Asia | |  | | Samalca, I. 2007. Estimation of forest biomass and its error: A case in Kalimantan, Indonesia. MSc thesis. International Institute for Geo-information Science and Earth Observation, Enschede. | |
| Pinus tabuliformis | Asia | |  | | Zhao, J., Kang, F., Wang, L., Yu, X., Zhao, W., Song, X., Zhang, Y., Chen, F., Sun, Y., He, T. & Han, H. 2014. Patterns of biomass and carbon distribution across a chronosequence of Chinese pine (Pinus tabulaeformis) forests. PLoS One. 9(4), p.e94966. | |
| Lophopetalum spp | Asia | |  | | Samalca, I. 2007. Estimation of forest biomass and its error: A case in Kalimantan, Indonesia. MSc thesis. International Institute for Geo-information Science and Earth Observation, Enschede. | |
| Mezzettia spp | Asia | |  | | Samalca, I. 2007. Estimation of forest biomass and its error: A case in Kalimantan, Indonesia. MSc thesis. International Institute for Geo-information Science and Earth Observation, Enschede. | |
| Shorea uliginosa | Asia | |  | | Nugroho, N. 2014. Developing Site-specific Allometric Equations for Above-ground Biomass Estimation in Peat Swamp Forests of Rokan Hilir District, Riau Province, Indonesia. Indonesian Journal of Forestry Research. 1(1): 47-65. | |
| Calophyllum spp | Asia | |  | | Samalca, I. 2007. Estimation of forest biomass and its error: A case in Kalimantan, Indonesia. MSc thesis. International Institute for Geo-information Science and Earth Observation, Enschede. | |
| Homalanthus populneus | Asia | |  | | Hiratsuka, M., Toma, T., Diana, R., Hadriyanto, D. & Morikawa, Y. 2006. Biomass recovery of naturally regenerated vegetation after the 1998 forest fire in East Kalimantan, Indonesia. Japan Agricultural Research Quarterly: JARQ. 40(3): 277-282. | |
| Mallotus paniculatus | Asia | |  | | Hiratsuka, M., Toma, T., Diana, R., Hadriyanto, D. & Morikawa, Y. 2006. Biomass recovery of naturally regenerated vegetation after the 1998 forest fire in East Kalimantan, Indonesia. Japan Agricultural Research Quarterly: JARQ. 40(3): 277-282. | |
| Macaranga gigantea | Asia | |  | | Hiratsuka, M., Toma, T., Diana, R., Hadriyanto, D. & Morikawa, Y. 2006. Biomass recovery of naturally regenerated vegetation after the 1998 forest fire in East Kalimantan, Indonesia. Japan Agricultural Research Quarterly: JARQ. 40(3): 277-282. | |
| Macaranga hypoleuca | Asia | |  | | Hiratsuka, M., Toma, T., Diana, R., Hadriyanto, D. & Morikawa, Y. 2006. Biomass recovery of naturally regenerated vegetation after the 1998 forest fire in East Kalimantan, Indonesia. Japan Agricultural Research Quarterly: JARQ. 40(3): 277-282. | |
| Trema orientalis | Asia | |  | | Hiratsuka, M., Toma, T., Diana, R., Hadriyanto, D. & Morikawa, Y. 2006. Biomass recovery of naturally regenerated vegetation after the 1998 forest fire in East Kalimantan, Indonesia. Japan Agricultural Research Quarterly: JARQ. 40(3): 277-282. | |
| Melastoma malabathricum | Asia | |  | | Hiratsuka, M., Toma, T., Diana, R., Hadriyanto, D. & Morikawa, Y. 2006. Biomass recovery of naturally regenerated vegetation after the 1998 forest fire in East Kalimantan, Indonesia. Japan Agricultural Research Quarterly: JARQ. 40(3): 277-282. | |
| Lithocarpus spp | Asia | |  | | Samalca, I. 2007. Estimation of forest biomass and its error: A case in Kalimantan, Indonesia. MSc thesis. International Institute for Geo-information Science and Earth Observation, Enschede. | |
| Parishia spp | Asia | |  | | Samalca, I. 2007. Estimation of forest biomass and its error: A case in Kalimantan, Indonesia. MSc thesis. International Institute for Geo-information Science and Earth Observation, Enschede. | |
| Spatholobus ferrugineus | Asia | |  | | Addo-Fordjour, P. & Rahmad, Z. 2013. Development of allometric equations for estimating above-ground liana biomass in tropical primary and secondary forests, Malaysia. International Journal of Ecology. 2013. | |
| Bouea spp | Asia | |  | | Samalca, I. 2007. Estimation of forest biomass and its error: A case in Kalimantan, Indonesia. MSc thesis. International Institute for Geo-information Science and Earth Observation, Enschede. | |
| Tectona grandis | Asia | |  | | Hiratsuka, M., Chingchai, V., Kantinan, P., Sirirat, J., Sato, A., Nakayama, Y., Matsunami, C., Osumi, Y. & Morikawa, Y. 2005. Tree biomass and soil carbon in 17-and 22-year-old stands of teak (Tectona grandis Lf) in northern Thailand. Tropics. 14(4): 377-382. | |
| Tectona grandis | Asia | |  | | Hiratsuka, M., Chingchai, V., Kantinan, P., Sirirat, J., Sato, A., Nakayama, Y., Matsunami, C., Osumi, Y. & Morikawa, Y. 2005. Tree biomass and soil carbon in 17-and 22-year-old stands of teak (Tectona grandis Lf) in northern Thailand. Tropics. 14(4): 377-382. | |
| Tectona grandis | Asia | |  | | Hiratsuka, M., Chingchai, V., Kantinan, P., Sirirat, J., Sato, A., Nakayama, Y., Matsunami, C., Osumi, Y. & Morikawa, Y. 2005. Tree biomass and soil carbon in 17-and 22-year-old stands of teak (Tectona grandis Lf) in northern Thailand. Tropics. 14(4): 377-382. | |
| Tectona grandis | Asia | |  | | Hiratsuka, M., Chingchai, V., Kantinan, P., Sirirat, J., Sato, A., Nakayama, Y., Matsunami, C., Osumi, Y. & Morikawa, Y. 2005. Tree biomass and soil carbon in 17-and 22-year-old stands of teak (Tectona grandis Lf) in northern Thailand. Tropics. 14(4): 377-382. | |
| Pinus tabuliformis | Asia | |  | | Zhao, J., Kang, F., Wang, L., Yu, X., Zhao, W., Song, X., Zhang, Y., Chen, F., Sun, Y., He, T. & Han, H. 2014. Patterns of biomass and carbon distribution across a chronosequence of Chinese pine (Pinus tabulaeformis) forests. PLoS One. 9(4), p.e94966. | |
| General | Asia | |  | | Tashi, S., Keitel, C., Singh, B. & Adams, M. 2017. Allometric equations for biomass and carbon stocks of forests along an altitudinal gradient in the eastern Himalayas. Forestry: An International Journal of Forest Research. 90(3): 445-454. | |
| Ficus spp | Asia | |  | | Hashimoto, T., Tange, T., Masumori, M., Yagi, H., Sasaki, S. & Kojima, K. 2004. Allometric equations for pioneer tree species and estimation of the aboveground biomass of a tropical secondary forest in East Kalimantan. Tropics. 14(1): 123-130. | |
| Strychnos curtisii | Asia | |  | | Addo-Fordjour, P. & Rahmad, Z. 2013. Development of allometric equations for estimating above-ground liana biomass in tropical primary and secondary forests, Malaysia. International Journal of Ecology. 2013. | |
| Strychnos curtisii | Asia | |  | | Addo-Fordjour, P. & Rahmad, Z. 2013. Development of allometric equations for estimating above-ground liana biomass in tropical primary and secondary forests, Malaysia. International Journal of Ecology. 2013. | |
| Allantospermum spp | Asia | |  | | Samalca, I. 2007. Estimation of forest biomass and its error: A case in Kalimantan, Indonesia. MSc thesis. International Institute for Geo-information Science and Earth Observation, Enschede. | |
| Ficus spp | Asia | |  | | Hiratsuka, M., Toma, T., Diana, R., Hadriyanto, D. & Morikawa, Y. 2006. Biomass recovery of naturally regenerated vegetation after the 1998 forest fire in East Kalimantan, Indonesia. Japan Agricultural Research Quarterly: JARQ. 40(3): 277-282. | |
| Walsura trichostemon | Asia | |  | | Sabharsi, S., Khenmark, C., Aksornhoae, S. & Ratisoonthorn, P. 1968. Primary Production in Dry-Evergreen Forest at Sakaerat, Amphoe Pak Thongchai, Changwat Nakhonratchasima. 1. Estimation of Biomass and Distribution amongst various organs. ASRCT Cooperative Research Program. (27). | |
| Memecylon ovatum | Asia | |  | | Sabharsi, S., Khenmark, C., Aksornhoae, S. & Ratisoonthorn, P. 1968. Primary Production in Dry-Evergreen Forest at Sakaerat, Amphoe Pak Thongchai, Changwat Nakhonratchasima. 1. Estimation of Biomass and Distribution amongst various organs. ASRCT Cooperative Research Program. (27). | |
| Piper aduncum | Asia | |  | | Hiratsuka, M., Toma, T., Diana, R., Hadriyanto, D. & Morikawa, Y. 2006. Biomass recovery of naturally regenerated vegetation after the 1998 forest fire in East Kalimantan, Indonesia. Japan Agricultural Research Quarterly: JARQ. 40(3): 277-282. | |
| Geunsia pentandra | Asia | |  | | Hiratsuka, M., Toma, T., Diana, R., Hadriyanto, D. & Morikawa, Y. 2006. Biomass recovery of naturally regenerated vegetation after the 1998 forest fire in East Kalimantan, Indonesia. Japan Agricultural Research Quarterly: JARQ. 40(3): 277-282. | |
| Diospyros spp | Asia | |  | | Samalca, I. 2007. Estimation of forest biomass and its error: A case in Kalimantan, Indonesia. MSc thesis. International Institute for Geo-information Science and Earth Observation, Enschede. | |
| Excoecaria agallocha | Asia | |  | | Hossain, M., Siddique, M., Saha, S. & Abdullah, S. 2015. Allometric models for biomass, nutrients and carbon stock in Excoecaria agallocha of the Sundarbans, Bangladesh. Wetlands ecology and management. 23(4): 765-774. | |
| General | Asia | |  | | Manuri, S., Brack, C., Noorâ€™an, F., Rusolono, T., Anggraini, S., Dotzauer, H. & Kumara, I. 2016. Improved allometric equations for tree aboveground biomass estimation in tropical dipterocarp forests of Kalimantan, Indonesia. Forest Ecosystems. 3(1): 28. | |
| General | Asia | |  | | Manuri, S., Brack, C., Noorâ€™an, F., Rusolono, T., Anggraini, S., Dotzauer, H. & Kumara, I. 2016. Improved allometric equations for tree aboveground biomass estimation in tropical dipterocarp forests of Kalimantan, Indonesia. Forest Ecosystems. 3(1): 28. | |
| Vatica spp | Asia | |  | | Samalca, I. 2007. Estimation of forest biomass and its error: A case in Kalimantan, Indonesia. MSc thesis. International Institute for Geo-information Science and Earth Observation, Enschede. | |
| Garcinia spp | Asia | |  | | Samalca, I. 2007. Estimation of forest biomass and its error: A case in Kalimantan, Indonesia. MSc thesis. International Institute for Geo-information Science and Earth Observation, Enschede. | |
| General | Asia | |  | | Tashi, S., Keitel, C., Singh, B. & Adams, M. 2017. Allometric equations for biomass and carbon stocks of forests along an altitudinal gradient in the eastern Himalayas. Forestry: An International Journal of Forest Research. 90(3): 445-454. | |
| General | Asia | |  | | Tashi, S., Keitel, C., Singh, B. & Adams, M. 2017. Allometric equations for biomass and carbon stocks of forests along an altitudinal gradient in the eastern Himalayas. Forestry: An International Journal of Forest Research. 90(3): 445-454. | |
| General | Asia | |  | | Kenzo, T., Furutani, R., Hattori, D., Kendawang, J., Tanaka, S., Sakurai, K. & Ninomiya, I. 2009. Allometric equations for accurate estimation of above-ground biomass in logged-over tropical rainforests in Sarawak, Malaysia. Journal of Forest Research, 14(6): 365. | |
| Stemonurus spp | Asia | |  | | Samalca, I. 2007. Estimation of forest biomass and its error: A case in Kalimantan, Indonesia. MSc thesis. International Institute for Geo-information Science and Earth Observation, Enschede. | |
| Strychnos ignatii | Asia | |  | | Addo-Fordjour, P. & Rahmad, Z. 2013. Development of allometric equations for estimating above-ground liana biomass in tropical primary and secondary forests, Malaysia. International Journal of Ecology. 2013. | |
| Madhuca spp | Asia | |  | | Samalca, I. 2007. Estimation of forest biomass and its error: A case in Kalimantan, Indonesia. MSc thesis. International Institute for Geo-information Science and Earth Observation, Enschede. | |
| Baccaurea spp | Asia | |  | | Samalca, I. 2007. Estimation of forest biomass and its error: A case in Kalimantan, Indonesia. MSc thesis. International Institute for Geo-information Science and Earth Observation, Enschede. | |
| General | | Asia | |  | | Manuri, S., Brack, C., Rusolono, T., Noorâ€™an, F., Verchot, L., Maulana, S., Adinugroho, W., Kurniawan, H., Sukisno, D., Kusuma, G. & Budiman, A. 2017. Effect of species grouping and site variables on aboveground biomass models for lowland tropical forests of the Indo-Malay region. Annals of Forest Science. 74(1): 23. |
| Dorophyllum spp | | Asia | |  | | Samalca, I. 2007. Estimation of forest biomass and its error: A case in Kalimantan, Indonesia. MSc thesis. International Institute for Geo-information Science and Earth Observation, Enschede. |
| Alseodaphne spp | | Asia | |  | | Samalca, I. 2007. Estimation of forest biomass and its error: A case in Kalimantan, Indonesia. MSc thesis. International Institute for Geo-information Science and Earth Observation, Enschede. |
| Koompassia spp | | Asia | |  | | Samalca, I. 2007. Estimation of forest biomass and its error: A case in Kalimantan, Indonesia. MSc thesis. International Institute for Geo-information Science and Earth Observation, Enschede. |
| Mangifera spp | | Asia | |  | | Samalca, I. 2007. Estimation of forest biomass and its error: A case in Kalimantan, Indonesia. MSc thesis. International Institute for Geo-information Science and Earth Observation, Enschede. |
